1 **A CRISPRi/a platform in iPSC-derived microglia uncovers regulators of disease states**

2  
3 Nina M. Dräger<sup>1</sup>, Sydney M. Sattler<sup>1,=</sup>, Cindy Tzu-Ling Huang<sup>2,=</sup>, Olivia M. Teter<sup>1,3</sup>, Kun  
4 Leng<sup>1,4,5</sup>, Sayed Hadi Hashemi<sup>6</sup>, Jason Hong<sup>1</sup>, Giovanni Aviles<sup>1</sup>, Claire D. Clelland<sup>2,7</sup>, Lihong  
5 Zhan<sup>2</sup>, Joe C. Udeochu<sup>2</sup>, Lay Kodama<sup>2,5,8</sup>, Andrew B. Singleton<sup>9,10</sup>, Mike A. Nalls<sup>9,10,11</sup>, Justin  
6 Ichida<sup>12,13,14</sup>, Michael E. Ward<sup>15</sup>, Faraz Faghri<sup>6,9,10,11</sup>, Li Gan<sup>2,7,16,\*</sup>, Martin Kampmann<sup>1,17,18,\*</sup>

7  
8 <sup>1</sup> Institute for Neurodegenerative Diseases, University of California, San Francisco, San  
9 Francisco, CA, USA

10 <sup>2</sup> Gladstone Institute of Neurological Disease, San Francisco, CA, USA

11 <sup>3</sup> UC Berkeley-UCSF Graduate Program in Bioengineering, University of California San  
12 Francisco, San Francisco, CA, USA

13 <sup>4</sup> Biomedical Sciences Graduate Program, University of California, San Francisco, San  
14 Francisco, CA, USA

15 <sup>5</sup> Medical Scientist Training Program, University of California, San Francisco, San Francisco,  
16 CA, USA

17 <sup>6</sup> Department of Computer Science, University of Illinois at Urbana-Champaign, Urbana, IL,  
18 USA

19 <sup>7</sup> Department of Neurology, University of California, San Francisco, CA, 94158, USA.

20 <sup>8</sup> Neuroscience Graduate Program, University of California, San Francisco, San Francisco, CA,  
21 USA

22 <sup>9</sup> Center for Alzheimer's and Related Dementias, National Institutes of Health, Bethesda, MD,  
23 USA

24 <sup>10</sup> Laboratory of Neurogenetics, National Institute on Aging, National Institutes of Health,  
25 Bethesda, MD, USA

26 <sup>11</sup> Data Tecnica International, LLC, Glen Echo, MD, USA

27 <sup>12</sup> Department of Stem Cell Biology and Regenerative Medicine, Keck School of Medicine,  
28 University of Southern California, Los Angeles, CA, USA

29 <sup>13</sup> Eli and Edythe Broad CIRM Center for Regenerative Medicine and Stem Cell Research at  
30 USC, Los Angeles, CA, USA

31 <sup>14</sup> Zilkha Neurogenetic Institute, Keck School of Medicine, University of Southern California,  
32 Los Angeles, CA, USA

33 <sup>15</sup> National Institute of Neurological Disorders and Stroke, National Institutes of Health,  
34 Bethesda, MD, USA

35 <sup>16</sup> Helen and Robert Appel Alzheimer's Disease Research Institute, Brain and Mind Research  
36 Institute, Weill Cornell Medicine, New York, NY, USA

37 <sup>17</sup> Department of Biochemistry and Biophysics, University of California, San Francisco, San  
38 Francisco, CA, USA

39 <sup>18</sup> Chan Zuckerberg Biohub, San Francisco, CA, USA

40 <sup>=</sup>Equal contribution

41  
42 \*Corresponding authors: [lig2033@med.cornell.edu](mailto:lig2033@med.cornell.edu), [martin.kampmann@ucsf.edu](mailto:martin.kampmann@ucsf.edu).

43

## 44 **ABSTRACT**

45

46 Microglia are emerging as key drivers of neurological diseases. However, we lack a systematic  
47 understanding of the underlying mechanisms. Here, we present a screening platform to  
48 systematically elucidate functional consequences of genetic perturbations in human iPSC-  
49 derived microglia. We developed an efficient eight-day protocol for the generation of microglia-  
50 like cells based on the inducible expression of six transcription factors. We established inducible  
51 CRISPR interference and activation in this system and conducted three screens targeting the  
52 “druggable genome”. These screens uncovered genes controlling microglia survival, activation  
53 and phagocytosis, including neurodegeneration-associated genes. A screen with single-cell RNA  
54 sequencing as the readout revealed that these microglia adopt a spectrum of states mirroring  
55 those observed in human brains and identified regulators of these states. A disease-associated  
56 state characterized by SPP1 expression was selectively depleted by CSF1R inhibition. Thus, our  
57 platform can systematically uncover regulators of microglia states, enabling their functional  
58 characterization and therapeutic targeting.

59

60

## 61 **INTRODUCTION**

62

63 Historically, neuroscience has investigated brain function and disease through a neuron-centric  
64 lens, relegating glia to the sidelines. Neuroinflammation has typically been viewed as a  
65 secondary, reactive aspect of disease. More recently, however, key roles have emerged for glial  
66 cell types, including microglia, the innate immune cells of the brain. It is now widely accepted  
67 that microglia have a central role in brain development and homeostasis as well as in the  
68 pathogenesis of many brain disorders<sup>1</sup>. Over the last decade, human genetics have pointed to a  
69 central role for microglia in brain diseases such as Alzheimer’s Disease (AD)<sup>2</sup>, where specific  
70 disease-associated genetic variants likely act in microglia, redefining them as potential drivers of  
71 AD. To understand the molecular mechanisms underlying the role of microglia in disease and  
72 target them therapeutically, it is necessary to bridge the gap between disease-associated genetic  
73 variants and changes in microglial function.

74

75 A major challenge is that microglia adopt a large number of distinct functional states in health  
76 and disease. In homeostatic states, microglia survey their local environment, phagocytose myelin  
77 and cell debris, and monitor neuronal activity<sup>3</sup>. In disease states, microglia can play beneficial  
78 roles, but they are also responsible for an increased production of proinflammatory cytokines, an  
79 exacerbated inflammatory response and secrete toxic factors to directly or indirectly damage  
80 neurons<sup>4, 5</sup>. Eventually, microglia exhibit pathological features, such as mitochondrial and  
81 endolysosomal dysfunction, impaired phagocytosis, and increased production of reactive oxygen  
82 species (ROS)<sup>6</sup>.

83

84 Microglial states in health and disease are actively being mapped on the molecular level in mice  
85 and humans<sup>7-13</sup>. However, we do not systematically understand how these distinct microglial  
86 states contribute to brain function and disease, or the molecular mechanisms regulating these  
87 states.

88

89 A promising approach to tackle these questions is enabled by CRISPR-based functional  
90 genomics in differentiated human cell types<sup>14</sup>. Pooled CRISPR interference (CRISPRi) and  
91 CRISPR activation (CRISPRa) screens enable scalable modeling of changes in gene expression  
92 and genetic screens to uncover regulatory mechanisms. When combined with induced pluripotent  
93 stem cell (iPSC) technology, they enable the investigation of cell-type specific biology in human  
94 cells, including those derived from patients<sup>14</sup>. We recently provided a proof of principle for this  
95 strategy by establishing CRISPRi and CRISPRa platforms for genetic screens in iPSC-derived  
96 neurons<sup>15, 16</sup>. However, such screens have not previously been implemented in iPSC-derived  
97 microglia due to challenges inherent in available differentiation protocols. Pooled CRISPR  
98 screens rely on lentiviral transduction to introduce libraries of single guide RNAs (sgRNAs), but  
99 mature microglia are difficult to transduce with lentivirus. This problem could be overcome by  
100 introducing sgRNAs at the iPSC stage. However, most existing protocols are lengthy and aim to  
101 recapitulate human microglia ontogeny<sup>17-23</sup>, resulting in population bottlenecks during  
102 differentiation, which can skew the representation of the sgRNA library.

103  
104 To overcome these challenges, we developed a different approach for the generation of iPSC-  
105 derived microglia by generating a human iPSC line inducibly expressing six transcription factors  
106 that enable the generation of microglia-like cells in a rapid and efficient eight-day protocol.  
107 These induced-transcription factor microglia-like cells (iTF-Microglia) resemble other iPSC-  
108 derived microglia in their expression profiles, response to inflammatory stimuli, phagocytic  
109 capabilities, and capacity to be co-cultured with iPSC-derived neurons<sup>17-23</sup>. By integrating  
110 inducible CRISPRi/a machinery into this cell line, we developed a genetic screening system that  
111 enables robust knockdown and overexpression of endogenous genes in human microglia. Using  
112 this platform, we conducted pooled CRISPRi and CRISPRa screens for modifiers of survival,  
113 phagocytosis and inflammatory activation, which uncovered microglia-specific genes controlling  
114 these phenotypes. A screen with single-cell RNA sequencing as the readout revealed that these  
115 microglia adopt a spectrum of states mirroring those observed in human brains, and pinpointed  
116 regulators of specific states, which can enable the functional characterization and therapeutic  
117 targeting of these states.

118  
119

## 120 **RESULTS**

121

### 122 **Inducible transcription factors enable rapid and scalable production of microglia-like cells** 123 **(iTF-Microglia)**

124

125 High-throughput genetic CRISPRi/a screens are a powerful discovery tool in human iPSC-  
126 derived neurons<sup>15, 16</sup>. However, such screens have not yet been conducted in iPSC-derived  
127 microglia. One obstacle has been the fact that until very recently<sup>24</sup>, existing differentiation  
128 protocols involved a long, multi-step procedure, which recapitulates the human microglia  
129 ontogeny. We set out to create a fast, robust and scalable differentiation protocol to differentiate  
130 iPSCs to microglia-like cells for use in CRISPR screens. To this end, we developed a strategy  
131 based on direct cell fate conversion by overexpression of microglia fate-determining  
132 transcription factors.

133

134 Based on transcriptomic and developmental data<sup>25-27</sup>, we selected six transcription factors highly  
135 expressed in human microglia. PU.1 and interferon regulatory factor-8 (IRF-8) are known to be  
136 crucial for microgliogenesis<sup>28</sup>. MAFB increases during microglia development and promotes an  
137 anti-inflammatory phenotype<sup>29</sup>, while CEBP $\alpha$  and CEBP $\beta$ <sup>30</sup> and IRF-5<sup>31</sup> regulate a wide range  
138 of inflammatory mediators. We engineered an iPSC line with two integrated cassettes of three  
139 transcription factors each. Cassettes for the doxycycline-inducible expression of transgenic  
140 PU.1/CEBP $\beta$ /IRF5 and MAFB/CEBP $\alpha$ /IRF8 were integrated into the CLYBL and AAVS1 safe  
141 harbor loci, respectively, in the WTC11 iPSC line (Fig. 1a).

142  
143 We established a simple three-step protocol to differentiate these iPSCs into microglia-like cells,  
144 which we will refer to as iTF-Microglia, in only 8 days (Fig. 1b). After doxycycline induction of  
145 transcription factor expression on Day 0, media was supplemented with cytokines GM-CSF and  
146 IL-34 on Day 2 to promote differentiation and survival. On Day 4, the media was additionally  
147 supplemented with the cytokines M-CSF and TGF- $\beta$ . iTF-Microglia reached a fully ramified  
148 morphology on Day 8 and maintained excellent viability for at least another 8 days (Fig. 1b). We  
149 generally have continued doxycycline supplementation beyond Day 8; however, this is not  
150 necessary for survival (Extended Data Fig. 1a,b). We confirmed robust inducible expression of  
151 the transgenic transcription factors (Fig. 1c).

152  
153 The canonical microglia markers GPR34 and IBA1 were expressed in the iTF-Microglia at Day  
154 8 of differentiation (Fig. 1d). To confirm the cell type identity of iTF-Microglia, we conducted  
155 RNA-Seq and compared transcript levels of iPSC markers and microglia markers in Day-9 and  
156 Day-15 iTF-iMicroglia to the parental iPSCs (Fig. 1e, Supplementary Table 1). As expected, the  
157 expression of iPSC markers was drastically reduced in iTF-Microglia at Day 9 and Day 15,  
158 whereas microglia markers were induced. Some markers, such as *P2RY12*, *CSF1R*, *CYBB* and  
159 *CD14* slightly increased their expression from Day 9 to Day 15, indicating further incremental  
160 maturation from Day 9 to Day 15. While the transcriptomic signature of our microglia was  
161 distinct from primary human microglia (Fig. 1f, Extended Data Fig. 1c), it was comparable to  
162 that of several other iPSC-derived microglia protocols.

163  
164 In conclusion, our transcriptomic and immunofluorescence results indicate robust expression of  
165 microglia markers in iTF-Microglia. Importantly, our novel differentiation strategy is compatible  
166 with large-scale pooled sgRNA screens, whereas classical protocols create population  
167 bottlenecks (Extended Data Fig. 1d).

168  
169

## 170 **Functional characterization of iTF-Microglia**

171

172 Next, we asked whether iTF-Microglia recapitulated cellular functions of human microglia.  
173 Microglia are the professional phagocytes in the brain, enabling them to clear neuronal debris,  
174 prune synapses and engulf pathogens. Using live-cell imaging and flow cytometry, we found that  
175 iTF-Microglia robustly phagocytose fluorescent beads (Extended Data Fig. 2a) and rat  
176 synaptosomes labeled with the pH-sensitive fluorescent dye pHrodo (Fig. 2a, b, Extended Data  
177 Fig. 2b). As expected, phagocytosis could be attenuated by the actin polymerization inhibitor  
178 Cytochalasin D, since phagocytosis depends on actin dynamics (Fig. 2a, b, Extended Data Fig.  
179 2c).



180  
181 Microglia express pattern recognition receptors such as Toll-like receptors that mediate the  
182 inflammatory response to pathogen-associated patterns including bacterial-derived  
183 lipopolysaccharide (LPS). To test the inflammatory response of iTF-Microglia, we stimulated  
184 them with LPS for 24 h and evaluated morphological changes after staining for F-actin. LPS-  
185 stimulated iTF-Microglia were less ramified, and instead displayed the amoeboid morphology  
186 characteristic of activated microglia (Fig. 2c, Extended Data Fig. 2d). In addition to the observed  
187 morphological changes, we examined transcriptomic alterations after LPS challenge by RNA-  
188 Seq (Fig. 2d, Supplementary Table 2). As anticipated, many of the highly upregulated genes  
189 were immune response genes such as *C3*, *CXCL10*, *IL32* and *SAAI*. Moreover, several  
190 upregulated genes were members of the NF- $\kappa$ B pathway. Downregulated genes included  
191 *TREM2*, markers of homeostatic microglia, such as *P2RY13*, and members of the TGF- $\beta$   
192 signaling pathway, such as *SLC40A1*. Transcriptomic changes in response to LPS were  
193 substantially overlapping with those observed in iPSC-derived microglia we generated following  
194 an alternative, previously published<sup>22</sup> protocol (Extended Data Fig. 2e, Supplementary Table 2).

195  
196 To examine cytokine secretion of iTF-Microglia, we measured the abundance of 36 cytokines  
197 secreted in standard culture conditions or following LPS stimulation. Control buffer-treated iTF-  
198 Microglia secreted most cytokines at low levels, but higher levels of CCL2 and CXCL1,  
199 suggesting the presence of activated cells under control conditions (Fig. 2e), consistent with  
200 previous reports suggesting that even primary microglia become partially activated when  
201 cultured<sup>32</sup>. When stimulated with LPS, levels of most secreted cytokines increased; the most  
202 increased cytokine levels were IL-6 with a 14-fold increase and IL-8 and CXCL10, both  
203 increased over 4-fold (Fig. 2e).

204  
205 During human development, microglia precursors enter the developing brain and mature together  
206 with neurons into fully functional microglia. To test if neurons can promote iTF-Microglia  
207 maturation, we co-cultured iTF-Microglia with iPSC-derived glutamatergic neurons (iNeurons)  
208 in medium optimized for survival and functionality of both cell types (see Methods for details).  
209 Day 8 iTF-Microglia expressing GFP differentiated in mono-culture were co-cultured with  
210 iNeurons for one week. Remarkably, the co-cultured iTF-Microglia displayed a pronounced  
211 ramified morphology (Fig. 2f). In conclusion, we show that iTF-Microglia effectively  
212 phagocytose synaptosomes, respond to LPS and can be co-cultured with iPSC-derived neurons.

213  
214  
215 **Durable gene knockdown and overexpression by CRISPRi and CRISPRa in iTF-Microglia**

216  
217 Next, we established CRISPRi and CRISPRa in iTF-Microglia to enable robust knockdown and  
218 overexpression of endogenous genes, as well as large-scale loss- and gain-of-function genetic  
219 screens. Following the strategy, we previously established in human iPSC-derived neurons<sup>15, 16</sup>,  
220 we stably integrated constitutive CRISPRi machinery, inducible CRISPRi machinery, or  
221 inducible CRISPRa machinery into safe-harbor loci of iPSCs also engineered with the inducible  
222 microglial transcription factors (Fig. 3a). We confirmed a normal karyotype for the resulting  
223 monoclonal cell lines (Extended Data Fig. 3). Inducible CRISPRi/a systems enable flexible  
224 timing of the onset of gene perturbation in cells already expressing sgRNAs. This feature is  
225 particularly important for experiments in microglia: it enables lentiviral delivery of sgRNAs to

226 occur in iPSCs, which are much more amenable to lentiviral infection than microglia, without  
227 prematurely affecting genes that may be relevant for differentiation. In the constitutive CRISPRi  
228 line, the expression cassette contains a CAG promotor-driven dCas9-BFP-KRAB. In the  
229 inducible CRISPRi cassette, this CRISPRi machinery is flanked on both the N and the C termini  
230 with dihydrofolate reductase (DHFR) degrons. In the absence of the small molecule  
231 trimethoprim (TMP), DHFR degrons cause proteasomal degradation of fused proteins. Addition  
232 of TMP stabilizes the degron-tagged CRISPRi machinery. The inducible CRISPRa machinery  
233 consists of a DHFR-dCas9-VPH construct, which is similarly stabilized in the presence of TMP.  
234

235 To validate CRISPRi activity, we transduced iPSCs with a lentiviral construct expressing a  
236 sgRNA targeting the transferrin receptor gene (*TFRC*) or a non-targeting control (NTC) sgRNA.  
237 In cells expressing the constitutive CRISPRi machinery, knockdown of *TFRC* was robust in  
238 iPSCs and iTF-Microglia both on the protein level (Fig. 3b, Extended Data Fig. 4a) and mRNA  
239 level (Extended Data Fig. 4c,e). In cells expressing the inducible CRISPRi machinery, *TFRC*  
240 knockdown was completely dependent on the presence of TMP, and effective on the mRNA and  
241 protein levels, albeit with reduced knockdown compared to the constitutive CRISPRi system  
242 (Fig. 3c,d, Extended Data Fig. 4 b,d,f). For additional target genes we tested, we found examples  
243 of excellent around 80% knockdown with both the constitutive and the inducible system for  
244 *INPP5D* (Extended Data Fig. 4g,h), but also an example of a gene (*PICALM*) that was  
245 effectively knocked down by 90% with the constitutive CRISPRi (Extended Data Fig. 4i), but  
246 not by inducible CRISPRi (Extended Data Fig. 4j). Despite these limitations of our current  
247 inducible CRISPRi system, we decided to use it for the studies presented in this paper, since it  
248 enabled us to induce CRISPRi knockdown only upon differentiation, rather than in the iPSC  
249 state, thus reducing the likelihood of recovering phenotypes due to effects in iPSCs or on  
250 differentiation itself.  
251

252 Next, we validated the functionality of the inducible CRISPRa machinery by testing the  
253 induction of the endogenous gene *CXCR4*. We observed a robust and tightly inducible increase  
254 of *CXCR4* levels in iPSCs and iTF-Microglia on the mRNA level (Extended Data Fig. 4l,m) and  
255 the protein level (Fig. 3e, Extended Data Fig. 4k).  
256

## 257 **Identification of modifiers of microglial survival/proliferation by CRISPRi screens.**

260 Our first application of the inducible CRISPRi iTF-Microglia platform was to identify modifiers  
261 of microglia survival and proliferation in a pooled genetic screen (Fig. 4a). First, we transduced  
262 the iPSCs with our next-generation lentiviral CRISPRi sgRNA library targeting the “druggable  
263 genome”<sup>33</sup>. This library consists of sgRNAs targeting 2,325 genes encoding kinases,  
264 phosphatases, and other classes of druggable proteins with five sgRNAs per gene and 500 non-  
265 targeting control sgRNAs. After library transduction, the iPSCs were differentiated into iTF-  
266 Microglia by addition of doxycycline and TMP was added to induce CRISPRi activity. iTF-  
267 Microglia were collected before differentiation (Day 0) and on Day 15 post-induction.  
268 Frequencies of cells expressing each sgRNA were determined by next-generation sequencing  
269 (Fig. 4a, Supplementary Table 3).  
270

271 We compared the results from the iTF-Microglia survival screen to our previously published<sup>15</sup>  
272 CRISPRi survival screen in iPSC-derived neurons (Fig. 4b) and iPSCs (Extended Fig. 5a). We  
273 found that genes affecting microglial survival, neuronal survival and iPSC survival were largely  
274 distinct. Knockdown of cholesterol biogenesis enzymes and V-ATPase subunits drastically  
275 reduced neuronal but not microglial survival (Fig. 4b). Conversely, knockdown of members of  
276 the colony stimulating factor (CSF) receptor family (*CSF1R*, *CSF2RB*, *CSF2RA*) strongly  
277 reduced survival of microglia but not neurons (Fig. 4b) or iPSCs (Extended Fig. 5a), consistent  
278 with their role in the development and survival of microglia and macrophages<sup>34-37</sup>. We validated  
279 *CSF1R* essentiality in a time-course experiment (Fig. 4c). The toxicity of *CSF1R* knockdown  
280 became pronounced only in differentiated iTF-Microglia (from Day 8 onwards), consistent with  
281 the microglia-specific role of *CSF1R*.

282  
283 Interestingly, the knockdown of several genes, including *CDK8* and *TGFBR2*, increased  
284 abundance of iTF-Microglia in our screen (Fig. 4b). However, we found that *CDK8* and  
285 *TGFBR2* knockdown resulted in decreased levels of microglia marker IBA1 (Extended Data Fig.  
286 5b,c), suggesting disrupted microglial differentiation. Indeed, inhibition of TGF- $\beta$  signaling has  
287 been shown to compensate for loss of *Oct4* pluripotency signaling<sup>38</sup> and microglia have been  
288 shown to be absent in TGF- $\beta$ 1-deficient mice<sup>39</sup>. *CDK8* expression has been shown to correlate to  
289 the stem cell pluripotency state and loss of *CDK8* could cause iPSCs to differentiate into a non-  
290 microglia state<sup>40</sup>. This disruption of the microglia differentiation does not seem specific to our  
291 iTF-Microglia differentiation protocol, since knockdown of *CDK8* also decreased IBA1 levels in  
292 iPSC-derived microglia we generated using a non-transcription factor-based differentiation  
293 protocol<sup>22</sup> (Extended Data Fig. 5d,e).

294  
295 To test whether *CDK8* and *TGFBR2* knockdown would also act in differentiated microglia, in  
296 addition to their effect on differentiation, we induced their CRISPRi knockdown on Day 8  
297 (Extended Data Fig. 5f). Induction of *CDK8* and *TGFBR2* knockdown in fully differentiated  
298 iTF-Microglia did not result in proliferation, and in the case of *TGFBR2* knockdown even in a  
299 very slight decrease in survival. By contrast, knockdown of *CSF1R* in Day 8 iTF-Microglia  
300 reproduced the phenotype observed in the initial screen (Extended Data Fig. 5f).

301  
302

### 303 **Identification of modifiers of microglial activation by CRISPRi screens.**

304

305 In a second screen, we aimed to identify modifiers of inflammatory activation of microglia. For  
306 this screen, we chose cell surface levels of CD38 as a readout for microglial activation. CD38,  
307 also known as cyclic ADP ribose hydrolase, is a plasma membrane glycoprotein of all brain  
308 cells<sup>41</sup>. CD38 expression and its enzymatic activity increases after LPS and interferon-gamma  
309 treatment in primary microglia<sup>42</sup>. Likewise, we observed transcript-level upregulation of CD38  
310 in response to LPS treatment in iTF-Microglia and microglia we differentiated based on a  
311 different protocol<sup>22</sup> (Extended Data Fig. 2e). Similarly, cell-surface levels of CD38 protein  
312 increased upon LPS treatment based on flow cytometry (Extended Data Fig. 5g). CD38 plays  
313 several roles in microglial activation, including in the secretion of proinflammatory cytokines<sup>43</sup>  
314 and in activation-mediated cell death<sup>42</sup>. Altogether, these data suggest that CD38 is both a  
315 marker and an important effector for the activation of microglia and is therefore a suitable  
316 marker for a screen for inflammation modifiers.

317  
318 The screen for modifiers of microglial activation was conducted as shown in Figure 4d. Briefly,  
319 iPSCs expressing the inducible CRISPRi machinery were transduced with the pooled sgRNA  
320 library described above. The cells were then differentiated into iTF-Microglia, stained for cell  
321 surface CD38 using a fluorescently tagged antibody and subjected to FACS sorting into CD38<sup>low</sup>  
322 and CD38<sup>high</sup> populations. Frequencies of cells expressing each sgRNA were identified in these  
323 populations using next-generation sequencing (Supplementary Table 3).

324  
325 This CRISPRi screen identified several genes regulating cell surface levels of CD38.  
326 Knockdown of two transcriptional regulators, *CDK12* and *MED1*, significantly increased CD38  
327 surface levels in the screen (Fig. 4e) and in validation experiments (Fig. 4f). CDK12 is known to  
328 be involved not only in cell cycle progression but also in TNF<sup>44</sup> and noncanonical NF- $\kappa$ B<sup>45</sup>  
329 signaling. While these previous reports may suggest a pro-inflammatory role of CDK12, our  
330 findings suggest that the role of CDK12 may be more nuanced or context-dependent, and we  
331 designated it for further investigation (see below). Another class of hits whose knockdown  
332 increased CD38 levels were members of the mitochondrial Complex I (NADH:ubiquinone  
333 oxidoreductase) *NDUFA8* and *NDUFS5* (Fig. 4e). Knockdown of components of this complex  
334 have previously been shown to promote an inflammatory state in macrophages<sup>46</sup>, validating our  
335 findings.

336  
337 Taken together, our large-scale CRISPRi screens in iTF-Microglia uncovered microglia-specific  
338 survival modifiers and novel modulators of inflammatory activation, demonstrating the ability of  
339 the iTF-Microglia screening platform to identify microglia-specific biology.

340  
341

### 342 **Modifiers of synaptosome phagocytosis by microglia**

343  
344 Microglial phagocytosis is central to brain homeostasis from development through aging<sup>47</sup>.  
345 Dysfunction in efferocytosis, the phagocytosis of dead cells, debris, protein aggregates and in  
346 synaptic pruning, the phagocytic elimination of neuronal synapses by microglia, have been  
347 implicated in neurodegenerative and psychiatric diseases<sup>48-51</sup>. To uncover regulators of  
348 microglial phagocytosis, we conducted parallel CRISPRi and CRISPRa screens in iTF-Microglia  
349 transduced with sgRNA libraries targeting the “druggable genome”. After 1.5 hours of  
350 incubation with pHrodo Red-labeled synaptosomes isolated from rat brains, iTF-Microglia were  
351 sorted via FACS based on the pHrodo Red fluorescence signal (Fig. 5a), and screens were  
352 analyzed as described for the CD38 FACS-based screen.

353  
354 There was little overlap between CRISPRi and CRISPRa hits (Extended Data Fig. 6a,  
355 Supplementary Table 3), confirming our previous findings from screens in diverse biological  
356 contexts that overexpression and knockdown screens can provide complementary insights<sup>16, 52, 53</sup>.  
357 The underlying reasons include (i) that unlike overexpression screens, knockdown screens can  
358 only yield phenotypes for genes expressed in the cell type under investigation, and (ii) that  
359 knockdown of a single element of a pathway or multi-subunit complex can cause a loss-of-  
360 function phenotype, whereas overexpression of a single element is generally not sufficient to  
361 elicit a gain-of-function phenotype for an entire pathway or multi-subunit complex. A prominent  
362 exception was the actin-binding protein *PFNI*, coding mutations in which cause ALS<sup>54</sup>. *PFNI*



363 had opposing phenotypes on synaptosome phagocytosis upon CRISPRi repression and CRISPRa  
364 induction (Fig. 5b). Unexpectedly, knockdown of *CSF1R* increased phagocytosis (Fig. 5b), even  
365 though, as we had previously found (Fig. 4b) its knockdown decreased iTF-Microglia survival.  
366 Another remarkable hit was the Alzheimer's disease risk factor *INPP5D*, knockdown of which  
367 slightly increased phagocytosis. Overexpression of *CD209*, a C-type lectin receptor present on  
368 the surface of macrophages and dendritic cells, greatly increased synaptosome phagocytosis (Fig.  
369 5b). We validated these phenotypes from the primary CRISPRi screen individually in iTF-  
370 Microglia (Extended Data Fig. 6b) and in iPSC-derived microglia generated an alternative  
371 protocol<sup>22</sup> (Extended Data Fig. 6c).

372  
373 We further investigated the CRISPRa hits *PFN1* and *CD209*. We validated upregulation of both  
374 genes by qPCR (Extended Data Fig. 6e). Pattern-recognition receptor CD209 has previously  
375 been shown to regulate phagocytic capacity in macrophages<sup>55</sup>. We wondered if *CD209* was  
376 additionally a substrate-specific phagocytosis regulator. To directly test the effect of *CD209* on  
377 substrate specificity, we adapted our phagocytosis assay to simultaneously test uptake of two  
378 separate substrates, pHRodo-Red labeled synaptosomes and yellow-green (YG) fluorescently  
379 labeled beads (Fig. 5c). Using this approach, we challenged iTF-Microglia with either  
380 synaptosomes or beads alone, or a mixture of both. Consistent with the screen result,  
381 overexpression of *CD209* increased phagocytosis of synaptosomes. Interestingly, it only changed  
382 bead phagocytosis by 10% (Fig. 5c), suggesting substrate specificity. However, when  
383 challenging iTF-Microglia with a mixture of beads and synaptosomes, bead phagocytosis was 2-  
384 fold increased compared to control iTF-Microglia. This finding suggests that presence of  
385 synaptosomes might stimulate general phagocytosis via *CD209*.

386  
387 In addition to decreased synaptosome phagocytosis, we observed increased F-actin levels in  
388 iTF-Microglia as a consequence of *PFN1* overexpression induced by CRISPRa (Fig. 5d),  
389 consistent with previous finding that moderate overexpression of PFN1 induces long stress fiber-  
390 like actin cables<sup>56</sup>. This process could disturb orchestrated actin polymerization at the membrane  
391 and thus decrease phagocytosis. In addition to direct effects on the actin cytoskeleton, *PFN1*  
392 knockdown has also been reported to result in anti-inflammatory changes<sup>57</sup>. Indeed, we observed  
393 transcriptional changes in immune-related genes and AD risk genes upon *PFN1* overexpression  
394 in iTF-Microglia (Fig. 5e, Supplementary Table 4).

395  
396 In conclusion, our complementary CRISPRi and CRISPRa screens identify known as well as  
397 novel phagocytosis modulators in microglia, which validated in iPSC-derived microglia  
398 generated using an alternative protocol.

399  
400

### 401 **Single-cell transcriptomics reveal distinct states of iTF-Microglia**

402

403 Several genes had CRISPRi phenotypes in more than one of the large-scale screens that we  
404 conducted (Extended Data Fig. 6f, Supplementary Table 3). We therefore hypothesized that  
405 some hit genes were not dedicated factors required for specific microglial processes, but rather  
406 more global regulators of distinct functional states. To test this hypothesis and gain more detailed  
407 insights into the mechanisms by which genes affect microglial functions, we selected 39 hit  
408 genes of interest, most of which had phenotypes in more than one of the large-scale primary



409 screens (Extended Data Fig. 6f, Supplementary Table 3) for characterization in a CROP-seq  
410 screen, which couples CRISPRi perturbation to single-cell RNA sequencing. We introduced a  
411 library of 81 sgRNAs (two sgRNAs targeting each selected gene (only a single sgRNA was  
412 included for *DBF4* due to an error) and four non-targeting control sgRNAs; Supplementary  
413 Table 5) into iPSCs, induced iTF-Microglia differentiation and CRISPRi activity, and performed  
414 single-cell RNA sequencing of 58,302 iTF-Microglia on Day 8 (Fig. 6a, Supplementary Table  
415 6).

416  
417 Unsupervised clustering and Uniform Manifold Approximation and Projection (UMAP)  
418 dimensional reduction of the single-cell transcriptomes uncovered distinct clusters (Fig. 6b). In  
419 one cluster, a high proportion of transcripts mapped to mitochondrial transcripts, suggesting  
420 damaged or dying cells; this cluster was removed from downstream analysis (Extended Data Fig.  
421 7a). Two clusters exclusively contained cells expressing sgRNAs targeting *CDK8* or *TGFBR2*  
422 (Fig. 6b and Extended Data Fig. 7b). These cells expressed high levels of the pluripotency  
423 marker *SOX2*, but low levels of the microglia marker *CSF1R* (Extended Data Fig. 7c). Together  
424 with our previous experiments showing reduced IBA1 levels for iTF-Microglia targeting *CDK8*  
425 and *TGFBR2* (Extended Data Fig. 5b,c), these findings suggest that microglia differentiation was  
426 disrupted in those cells. We removed those clusters from further analysis and retained the  
427 remaining cluster, which was characterized by high levels of *CSF1R* expression (Extended Data  
428 Fig. 7c). Importantly, 92.4% of cells expressing NTC sgRNAs were part of the cluster with high  
429 levels of *CSF1R* expression, confirming the high efficiency of our microglial differentiation  
430 protocol for unperturbed cells.

431  
432 Unsupervised clustering and UMAP dimensional reduction of the remaining 19,834 iTF-  
433 Microglia revealed 9 transcriptionally distinct clusters (Fig. 6c, Extended Data Fig. 7d).  
434 Microglia heterogeneity in response to different environmental conditions in the brain has been  
435 extensively studied<sup>58</sup>, but we were surprised to observe a wealth of distinct transcriptional states  
436 in the cultured iTF-Microglia. Importantly, NTC sgRNAs are represented in cells in every  
437 cluster, suggesting the observed heterogeneity is an innate quality of the iTF-Microglia  
438 (Extended Data Fig. 7d).

439  
440 Principal component analysis identified two major biological axes broadly defining these states.  
441 The first principal component (PC-1) corresponded to a polarized axis of inflammatory  
442 activation: starting from a central homeostatic state (cluster 6), one direction was defined by  
443 interferon-induced gene expression, whereas the other direction was defined by induction of  
444 chemokines (Fig. 6d and Extended Data Fig. 7e). The second principal component (PC-2)  
445 captures markers of proliferation, mainly in cluster 7 (Fig. 6e and Extended Data Fig. 7f).

446  
447 To further interpret each transcriptional microglia state, we performed differential gene  
448 expression analysis across the clusters (Supplementary Table 7) and named each cluster  
449 according to characteristic transcriptomic signatures. Figure 6f highlights the top three genes  
450 selectively expressed by cells in each cluster. Clusters 1 and 2 are both defined by high  
451 expression of interferon-induced genes and the complement gene *C3*. Cluster 1 is uniquely  
452 defined by high expression of chemokine *CXCL10*. Subsets of microglia characterized by  
453 upregulation of interferon response genes have been described in mouse models of  
454 neurodegeneration<sup>8</sup>.

455  
456 Cluster 3 is defined by the high expression of *SPP1* (Fig. 6g), which encodes secreted  
457 phosphoprotein 1, also known as osteopontin, a multifunctional protein acting both as part of the  
458 extracellular matrix and as a secreted cytokine<sup>59</sup>. Importantly, SPP1 is upregulated in several  
459 disease-associated microglia states in both human patients and mouse disease models. These  
460 include disease-associated microglia (DAM)<sup>9</sup> and activated response microglia (ARM)<sup>60</sup> in AD  
461 mouse models, and late-response microglia in CK-p25 mouse models of neurodegeneration<sup>8</sup>.  
462 SPP1-positive microglia states are also enriched in multiple sclerosis (MS) patients and mouse  
463 models<sup>12</sup> and enriched in microglia in the aging human brain<sup>13</sup>. Furthermore, SPP1 is highly  
464 expressed in glioma-associated microglia in mice and humans, where high expression of SPP1 is  
465 associated with poor prognosis<sup>61</sup>. Using flow cytometry, we found that SPP1-positive microglia  
466 have a slightly increased phagocytic activity, whereas CCL13-positive microglia have  
467 substantially decreased phagocytic activity (Fig. 6h). Integration of our iTF-Microglia dataset  
468 with a recent scRNA-seq dataset containing 16,242 human microglia from control and  
469 Alzheimer's Disease patient brains<sup>7</sup> showed conservation of the SPP1-positive microglia state  
470 (Fig. 6i). The proportion of SPP1-positive microglia was substantially increased in Alzheimer's  
471 disease patients compared to controls (Fig. 6j). Notably, it remains to be determined how the  
472 SPP1+ microglia state affects the pathogenesis of different diseases, since SPP1 has been linked  
473 to both pro-inflammatory and anti-inflammatory responses<sup>59</sup>. This question has been challenging  
474 to address since we have lacked tools to manipulate the SPP1+ state of microglia *in vivo*.

475  
476 Cluster 4 is defined by expression of pro-apoptotic p53 signaling genes, and Cluster 5 by  
477 expression of metallothionines. Cluster 6 is defined by the absence of interferon response genes  
478 or chemokines, and thus we interpreted it as representing homeostatic microglia. Cluster 7 is  
479 characterized by the expression of proliferation markers such as *TOP2A* and *MKI67*. Cluster 8  
480 and 9 are characterized by the expression of high levels of chemokines such as *CCL2* and *CCL3*.  
481 Cluster 9 is uniquely defined by high expression of *CCL13* (Fig. 6g). Such chemokine signatures  
482 have recently been found to be a hallmark of human microglia not observed in mice<sup>62</sup>.

483  
484 Taken together, single-cell RNA sequencing revealed that many important features of microglia  
485 diversity observed in human brains and in disease states are recapitulated in our iTF-Microglia *in*  
486 *vitro* model.

487  
488

### 489 **CROP-seq uncovers regulators of microglial cell states**

490  
491 We next identified the differentially expressed genes (DEGs) caused by CRISPRi knockdown of  
492 each gene targeted in the CROP-Seq screen (Extended Data Fig. 8, Supplementary Table 8). As  
493 expected, knockdown of functionally related genes shared common DEG signatures. For  
494 example, knockdown of *CSF1R*, *CSF2RA* and *CSF2RB* resulted in an upregulation of genes  
495 encoding the major histocompatibility complex as well as *CD36*, *CD74* and *CD68* (Extended  
496 Data Fig. 8, Supplementary Table 8), which are markers of phagocytic microglia and could  
497 possibly explain the increased phagocytic capacity we observed in response to *CSF1R*  
498 knockdown (Fig. 5b, Extended Data Fig. 6b).

499

500 Given the surprising heterogeneity of iTF-Microglia, we investigated if CRISPRi knockdown of  
501 specific genes could control microglial cell states. Indeed, cells containing sgRNAs targeting  
502 genes such as *CSF1R*, *CDK12* and *MAPK14* were enriched or depleted from specific clusters  
503 (Fig. 7A), and more generally, knockdown of many genes specifically affected the frequency of  
504 cell states (Fig. 7b, Extended Data Fig. 9a, Supplementary Table 9).

505  
506 Knockdown of *CDK12* shifted cells into cluster 9 (CCL13<sup>+</sup>, chemokine) (Fig. 7a-c). To validate  
507 this phenotype, we used a flow-cytometry approach in which secretion of CCL13 was inhibited  
508 with the transport inhibitor GolgiPlug. CCL13 levels in were increased over 2-fold with  
509 knockdown of *CDK12* (Fig. 7d), confirming our screen results. Next, we asked if the shift into  
510 cluster 9 might also have functional consequences for the iTF-Microglia. We measured  
511 synaptosome phagocytosis in CCL13<sup>high</sup> cells (representative of the cells in cluster 9) and  
512 CCL13<sup>low</sup> cells (representative of other clusters) in *CDK12* knockdown iTF-Microglia. As  
513 observed already in our phagocytosis screen (Fig. 5b), knockdown of *CDK12* decreased  
514 synaptosome phagocytosis, both in the CCL13<sup>low</sup> and CCL13<sup>high</sup> population (Fig. 7e). *CDK12*  
515 knockdown caused transcriptional downregulation of phosphatidylserine recognition receptors in  
516 both CCL13<sup>low</sup> and CCL13<sup>high</sup> cells, which may contribute to the decreased phagocytic activity  
517 (Extended Data Fig. 9b). Phagocytosis was even further decreased in the CCL13<sup>high</sup> population  
518 (Fig. 7e), suggesting that microglia in the CCL13<sup>+</sup> state have lower phagocytic capacity, as we  
519 showed previously (Fig. 6h). Knockdown of *CDK12* also had some cluster-specific effects  
520 (Extended Data Fig. 9b), highlighting the complex effects of gene perturbation in both shifting  
521 occupancy of cells between defined functional states, but also affecting cellular pathways in both  
522 general and state-specific ways. Interestingly, *MED1* had very similar knockdown phenotypes to  
523 *CDK12*, and both genes encode factors associated with general transcription by RNA polymerase  
524 II.

525  
526 We next turned our attention to regulators of the disease-relevant SPP1-positive cluster 3.  
527 Knockdown of *MAPK14* and *CSF1R* had dramatically opposing effects, increasing and  
528 decreasing occupancy in the SPP1 cluster, respectively (Fig. 7a,b,f). Using GolgiPlug treatment  
529 to block secretion of SPP1, we validated these phenotypes by flow cytometry: knockdown of  
530 *MAPK14* increased the population of SPP1<sup>+</sup> cells more than 6-fold (Fig. 7g), whereas *CSF1R*  
531 knockdown greatly diminished the proportion of SPP1<sup>+</sup> cells (Fig. 7h).

532  
533 Based on these results of genetic perturbations, we asked if pharmacological targeting of the  
534 same hits would similarly modulate the abundance of the SPP1<sup>+</sup> state. Indeed, inhibition of  
535 *MAPK14* with Skepinon-L increased the fraction of SPP1<sup>+</sup> microglia in a time-dependent  
536 manner at nontoxic concentrations (Fig 7i,j)

537  
538 Given that pharmacological inhibition of *CSF1R* has shown beneficial effects in several  
539 neurodegenerative mouse models, and was observed by us and others to selectively affect  
540 subpopulations of microglia in mice<sup>63-65</sup>, we tested if pharmacological inhibition of *CSF1R*  
541 would reduce the proportion of SPP1<sup>+</sup> microglia. While the *CSF1R* inhibitor PLX3397 showed  
542 dose-dependent toxicity in iTF-Microglia (Fig. 7k), low concentrations of *CSF1R* inhibitor that  
543 were nontoxic or low toxic to bulk iTF-Microglia selectively depleted SPP1<sup>+</sup> iTF-Microglia  
544 (Fig. 7l). Thus, both pharmacological and genetic inhibition of *CSF1R* can decrease the  
545 proportion of SPP1<sup>+</sup> cells.

546

547 In conclusion, our CROP-seq screen enabled deep characterization of the hit genes that our  
548 primary screens identified and revealed the existence of a wealth of microglia cell states and  
549 their regulators. To enable the scientific community to further explore this large dataset, we  
550 implemented additional functionality in the CRISPRbrain data commons  
551 (<https://www.crisprbrain.org/>) we previously described<sup>16</sup>. Specifically, interactive three-  
552 dimensional UMAP representations and heatmaps enable the selective investigation of cells by  
553 expression levels of genes of interest, sgRNA identity, and cluster membership.

554

555

## 556 DISCUSSION

557

558 In this study, we described a novel platform for large-scale, multimodal CRISPRi/a-based  
559 genetic screens in human iPSC-derived microglia. We demonstrated the power of this platform  
560 in multiple large-scale screens. While CRISPR knockout strategies are commonly used for loss-  
561 of-function screens, the partial knockdown achieved by CRISPRi enables a more nuanced  
562 characterization of the function of essential genes. For example, we uncovered a selective  
563 vulnerability of microglia in the SPP1+ state to partial knockdown of the microglia-essential  
564 gene *CSF1R*. The use of human microglia (as opposed to mouse primary microglia) enabled us  
565 to recapitulate microglia features found in human but not mouse brain, such as a state  
566 characterized by a chemokine signature<sup>62</sup>. iPSC technology will also make it possible to conduct  
567 CRISPRi/a screens in patient-derived cells to identify modifiers of phenotypes linked to genetic  
568 risk variants<sup>14</sup>.

569

570 Notwithstanding, there are several areas for future optimization of our iTF-Microglia platform.  
571 Improved inducible CRISPRi/a machinery with more potent gene repression and activation in  
572 fully differentiated iTF-Microglia would enable the induction of CRISPRi/a at later stages during  
573 differentiation to avoid false-positive hits that affect microglial differentiation, such as *CDK8*  
574 and *TGFBR2* (Fig. 4b, Extended Data Fig. 5b-f).

575

576 Another goal for future technology development is further acceleration and enhancement of the  
577 microglial maturation. One potential concern about sustained expression of transgenic  
578 transcription factors is that this could promote certain microglial states over others. A protocol in  
579 which transcription factor expression is discontinued after day 8 (Extended Data Fig. 1a) can  
580 mitigate this concern. As with all currently available *in vitro* culture systems, microglia are  
581 slightly activated in monoculture and lose their unique homeostatic brain signature<sup>32</sup>. Previous  
582 research has shown that iPSC-microglia become more homeostatic in co-culture with neurons<sup>21</sup>,  
583 which is compatible with our own observation of enhanced ramification of iTF-Microglia in  
584 neuronal co-culture (Fig. 2f). Alternatively, optimizing the set of transcription factors used to  
585 generate iTF-Microglia may result in improved abundance of homeostatic microglia. CRISPRa  
586 screens in our current platform are a scalable strategy to identify additional transcription factors  
587 to promote microglial maturation and homeostasis, leading to ever more faithful models of  
588 human microglia.

589

590 While there is room for future improvements, our current platform already uncovered new  
591 insights into microglial biology. We identified several genes associated with neurodegenerative



592 diseases, including *PFNI* and *INPP5D*, as modulators of phagocytosis in microglia (Fig. 5), thus  
593 pointing to a possible cellular mechanism by which variants in these genes contribute to disease.  
594 Coding mutations in profilin 1 (*PFNI*) gene cause amyotrophic lateral sclerosis (ALS)<sup>54</sup>. *PFNI*  
595 is a small actin-binding protein that promotes formin-based actin polymerization and regulates  
596 numerous cellular functions, but how mutations in *PFNI* cause ALS is unclear. The actin  
597 cytoskeleton is known to be important for the physiological functions of microglia, including  
598 migration and phagocytosis. We observed that *PFNI* overexpression disrupts the actin  
599 cytoskeleton in iTF-Microglia with higher levels of F-actin. Recently, a study has shown that  
600 *PFNI* is also involved in microglia activation, since knockdown of *PFNI* inhibited M1  
601 proinflammatory microglial polarization and promoted anti-inflammatory M2 microglia  
602 polarization after oxygen and glucose deprivation<sup>57</sup>. Introducing the ALS-associated mutations in  
603 the *PFNI* gene in iPSCs will shed light on the impact of these specific mutations on the function  
604 of different relevant cell types, such as iPSC-derived neurons and microglia.

605  
606 Genetic variants in the *INPP5D* locus are associated with an increased susceptibility to AD<sup>66</sup> and  
607 cerebrovascular function as well as tau and A $\beta$  levels in the cerebrospinal fluid of AD patients<sup>67</sup>.  
608 *INPP5D* encodes the lipid phosphatase SHIP1, which is selectively expressed in brain microglia.  
609 SHIP1 inhibits signal transduction initiated by activation of immune cell surface receptors, such  
610 as TREM2<sup>68</sup>. Intriguingly, *INPP5D* expression increases with AD progression, predominantly in  
611 plaque-associated microglia, and correlates with plaque density<sup>69</sup>. Given the results from our  
612 phagocytosis screen, *INPP5D* overexpression might result in microglia with deficient phagocytic  
613 capacity, resulting in increased A $\beta$  deposition and neurodegeneration. Concordant with the  
614 findings from our genetic screen, a recent study found that pharmacological SHIP1/2 inhibitors  
615 promote microglial phagocytosis *in vitro* and *in vivo*<sup>70</sup>.

616  
617 Our single-cell RNA sequencing screen revealed that iTF-Microglia adopt a spectrum of states,  
618 including states mirroring those observed in human brains, such as the SPP1-positive state. Even  
619 though our protocol uses overexpression of transcription factors to generate microglia-like cells,  
620 our combination of six transcription factors does not specify a single state, but recapitulates the  
621 intrinsic plasticity of cell states that is a hallmark of microglia.

622  
623 Our CROP-Seq screen identified genes controlling the distribution of iTF-Microglia across  
624 distinct cell states. Knockdown or pharmacological inhibition of *MAPK14* strongly promoted  
625 adoption of the disease-associated SPP1-positive state. Previous work suggested a functional  
626 connection between SPP1 and MAPK14 in cancer cells, where SPP1 can activate the p38 MAPK  
627 signaling pathway, which comprises MAPK14<sup>71</sup>. MAPK14 was also recently predicted to be a  
628 unique network regulator in DAM<sup>72</sup>. However, our identification of MAPK14 as a regulator of  
629 the SPP1+ state is novel and enhances our understanding of modulators of microglia cell states.

630  
631 We found that the SPP1-positive microglia state can be selectively depleted by genetic and  
632 pharmacological inhibition of CSF1R. CSF1R inhibitors have beneficial effects in mouse models  
633 of diseases including AD<sup>73, 74</sup>, tauopathy<sup>65</sup> and MS<sup>75</sup>. Intriguingly, CSF1R inhibition reduced  
634 SPP1 expression in the MS model, while homeostatic genes such as *TMEM119* and *P2RY12*  
635 were increased<sup>75</sup>, paralleling our finding that the SPP1 microglia state is selectively vulnerable to  
636 CSF1R inhibition. Additionally, disruption of CSF1-CSF1R signaling downregulated SPP1 in  
637 the cerebellum<sup>76</sup>. Combining CSF1R depletion and single cell profiling has enabled us



638 previously to elucidate the differential effects of CSF1R inhibitors on microglia subtypes<sup>63</sup>.  
639 Following CSF1R inhibition, we found an enrichment of microglia states with elevated markers  
640 of inflammatory chemokines and proliferation and interestingly, in concordance with our  
641 findings in iTF-Microglia here, an upregulation of cell surface receptor CD74<sup>63</sup>. Others have  
642 reported compensatory upregulation of TREM2/ $\beta$ -catenin and IL-34 in microglia following  
643 conditional CSF1R KO<sup>77</sup>; however, we did not find consistent upregulation of these factors in  
644 our iTF-microglia (Supplementary Table 9). Based on our new finding that CSF1R inhibition at  
645 low doses that are nontoxic to most microglia selectively depletes the SPP1+ population in iTF-  
646 Microglia, low-dose CSF1R inhibition might also give us a tool to study the SPP1+ population in  
647 mouse disease models.

648  
649 Taken together, our results have provided pharmacological strategies to either promote or deplete  
650 SPP1+ microglia. This will make it possible to determine the role of SPP1+ microglia in  
651 different diseases, where they may play either beneficial or detrimental roles, and to manipulate  
652 this disease-associated microglial state for therapeutic benefit.

653  
654 We anticipate that the screening platform we describe here can be broadly applied to screen for  
655 other microglia-related phenotypes, and to systematically identify regulators of different  
656 microglia states. Using iPSCs derived from patients with familial or sporadic diseases will enable  
657 the identification of potential therapeutic targets that can correct cellular phenotypes. For  
658 example, the APOE  $\epsilon$ 4 variant reduces the ability of iPSC-microglia to clear A $\beta$ <sup>78</sup> and  
659 dysregulates cholesterol biogenesis<sup>79</sup>, and CRISPR screens have the potential to elucidate the  
660 underlying molecular mechanisms and uncover potential remedies. Introduction of microglia into  
661 co-cultures or brain organoids can provide a screening platform to investigate their interactions  
662 with other brain cell types, such as synaptic pruning of neurons. Finally, transplantation of iTF-  
663 Microglia into postnatal, immune-deficient, humanized mice could result in microglia with an *ex*  
664 *vivo* human microglial gene signature, including more homeostatic microglia, and enable the  
665 investigation of factors controlling the interaction of microglia with a model for diseased brain  
666 environment<sup>80-83</sup>.

667

668

## 669 **ACKNOWLEDGEMENTS**

670 We thank Ruilin Tian for discussions about CROP-Seq, Chris Bohlen for advice on synaptosome  
671 protocols, Jessica Mella, Karinna Vivanco, Capria Rinaldi, Gabriel Sturm, Yaqiao Li, Carlo  
672 Condello, and Miranda Sullivan for contributions to preliminary studies. We thank Avi Samelson  
673 for feedback on the manuscript and members of the Kampmann lab for discussions.

674 This research was supported by NIH grants DP2 GM119139 and U01 MH115747 to MK, U54  
675 NS100717 to LG and MK, R01 AG051390 to LG, F30 AG066418 to KL, F30 AG062043 to LK,  
676 and funded by the Center for Alzheimer's and Related Dementias (CARD) of the National  
677 Institutes of Health (NIH) under Award Number ZO1 AG000534-02, and funded, in part,  
678 through the Intramural Research Program of the National Institutes of Neurological Disorders  
679 and Stroke (MEW). The research was also supported by an NSF Graduate Research Fellowship  
680 to OT, Tau Consortium Investigator Awards (Rainwater Charitable Foundation) to JKI, LG and  
681 MK, a Chan Zuckerberg Initiative Ben Barres Early Career Acceleration Award to MK. MK. is a  
682 Chan Zuckerberg Biohub Investigator. Development of new features for CRISPRbrain was  
683 supported, in part, by a collaboration among the Kampmann Lab, UCSF and Data Tecnica

684 International, LLC and funding from the Center for Alzheimer's and Related Dementias,  
685 National Institutes of Health.

686  
687  
688

## 689 **AUTHOR CONTRIBUTIONS**

690 The iTF-Microglia differentiation strategy was developed and characterized by CH and LG with  
691 contributions from CC, LZ, JCO, LK, JI and MW. Additionally, ND, SS, OT, KL, JH and MK  
692 contributed to the optimization and characterization of iTF-Microglia. CRISPR-based functional  
693 genomics studies were designed, conducted and analyzed by ND, SS and MK with contributions  
694 from OT, KL, GA and JH. SS led the computational analysis of all screens and RNA-Seq  
695 experiments. SHH and FF developed new features for the CRISPRbrain data commons with  
696 critical input from SS, ND and MK and feedback from MAN and ABS. ND, SS, CH, OT and  
697 MK created the Figures. ND, SS and MK conceptualized and wrote the manuscript with input  
698 from the other authors. All authors reviewed and approved the final manuscript.

699

## 700 **COMPETING INTEREST STATEMENT**

701 MN consults for Neuron23. MN and FF participated in this work in part due to a competitively  
702 awarded consulting contract between Data Tecnica International LLC and the National Institutes  
703 of Health (USA). JKI is a cofounder of AcuraStem, Inc. and Modulo Bio, and serves on the  
704 scientific advisory board of Spinogenix. LG is a founder of Aeton Therapeutics. MK has filed a  
705 patent application related to CRISPRi and CRISPRa screening (PCT/US15/40449), serves on the  
706 scientific advisory boards of Engine Biosciences, Casma Therapeutics, and Cajal Neuroscience  
707 and is a consultant to Modulo Bio. The remaining authors declare no competing interests.

708

## 709 **METHODS**

710

711 **Human iPSC culture.** Human iPSCs (male WTC11 background, PMID 24509632) were  
712 cultured in StemFlex™ Basal Medium (Gibco; Cat. No. A33493-01) on BioLite Cell Culture  
713 Treated Dishes (Thermo Fisher Scientific; assorted Cat. No.) coated with Growth Factor  
714 Reduced, Phenol Red-Free, LDEV-Free Matrigel Basement Membrane Matrix (Corning; Cat.  
715 No. 356231) diluted 1:100 in Knockout DMEM (GIBCO/Thermo Fisher Scientific; Cat. No.  
716 10829-018). StemFlex was replaced every other day or every day once 50% confluent. When  
717 70%-80% confluent, cells were passaged by aspirating media, washing with DPBS (Gibco; Cat.  
718 No. 14190-144), incubating with StemPro Accutase Cell Dissociation Reagent (GIBCO/Thermo  
719 Fisher Scientific; Cat. No. A11105-01) at 37°C for 7 min, diluting Accutase 1:5 in StemFlex,  
720 collecting cells in conicals, centrifuging at 220g for 5 min, aspirating supernatant, resuspending  
721 cell pellet in StemFlex supplemented with 10 nM Y-27632 dihydrochloride ROCK inhibitor  
722 (Tocris; Cat. No. 125410), counting, and plating onto matrigel-coated plates at the desired  
723 number. Human iPSCs studies at the University of California, San Francisco (UCSF) were  
724 approved by the Human Gamete, Embryo and Stem Cell Research Committee.

725

726 **Human CRISPR iTF-iPS cell line generation.** The two donor plasmids for inducible  
727 expression of six codon-optimized transcription factors were constructed using the plasmid  
728 pUCM (GENEWIZ). Human iPSCs (WTC11), acquired from Dr. Bruce Conklin (Gladstone  
729 Institute, San Francisco), were engineered to express PU.1, CEBPβ, and IRF5 under a

730 doxycycline-inducible system in the CLYBL safe harbor locus and MAFB, CEBP $\alpha$ , and IRF8 in  
731 the AAVS1 safe harbor locus using TALEN-based editing as previously described<sup>15</sup>. Clones  
732 were selected using both neomycin and puromycin, thus generating the cell line we termed iTF-  
733 iPSCs. Next, iTF-iPSCs were transfected with either pC13N-dCas9-BFP-KRAB<sup>15</sup>, pRT029-  
734 CLYBL-CAG-DHFR-dCas9-BFP-KRAB-NLS-DHFR<sup>15</sup>, or pRT043-CLYBL-DDdCas9VPH-  
735 GFP<sup>16</sup> to generate constitutive CRISPRi, inducible CRISPRi, or inducible CRISPRa iTF-iPS cell  
736 lines, respectively, in the CLYBL safe harbor locus using the same TALEN-editing method.  
737 After transfection, BFP-positive (CRISPRi) or GFP-positive (CRISPRa) iTF-iPSCs were  
738 repeatedly enriched via FACS sorting (BD FACS Aria Fusion).  
739 To generate monoclonal cell lines, 5,000 polyclonal CRISPR-iTF-iPSCs were plated on 10-cm  
740 dishes to enable isolation of individual clones under direct visualization with an inverted  
741 microscope (Evos FL, Thermo Fisher Scientific) in a tissue culture hood via manual scraping.  
742 Monoclonal cell lines were tested for iTF-Microglia differentiation capability and CRISPRi/a  
743 activity.

744  
745 **Human iPSC-derived iTF-Microglia cell culture and differentiation.** iTF-iPSCs were grown  
746 in StemFlex until reaching at least 50% confluency and were grown for at least 24h without  
747 ROCK inhibitor. They were dissociated and centrifuged as described above and pelleted cells  
748 were resuspended in Day 0 differentiation medium containing the following: Essential 8™ Basal  
749 Medium (Gibco; Cat. No. A15169-01) as a base, 10 nM ROCK inhibitor, and 2  $\mu$ g/ml  
750 Doxycycline (Clontech; Cat. No. 631311). iTF-iPSCs were counted and seeded onto double  
751 coated plates (Poly-D-Lysine-precoated Bio plates (Corning, assorted Cat. No.) + Matrigel  
752 coating) with the following seeding densities: 10,000 cells/well for 96-well plate, 0.1  
753 million/well for 12-well plate, 0.15 million/well for 6-well plate, 2 million/dish for 10-cm dish,  
754 and 8 million/dish for 15-cm dish. On day 2, media was replaced with Day 2 differentiation  
755 media containing Advanced DMEM/F12 Medium (Gibco; Cat. No. 12634-010) as a base  
756 medium containing the following: 1X Antibiotic-Antimycotic (Anti-Anti) (Gibco; Cat. No.  
757 15240-062), 1X GlutaMAX™ (Gibco; Cat. No. 35050-061), 2  $\mu$ g/ml doxycycline, 100 ng/ml  
758 Human IL34 (Peprotech; Cat. No. 200-34) and 10 ng/ml Human GM-CSF (Peprotech; Cat. No.  
759 300-03). Two days later, on day 4, the medium was replaced with iTF-Microglia medium,  
760 containing Advanced DMEM/F12 as a base medium and the following: 1X Anti-Anti, 1X  
761 GlutaMAX, 2  $\mu$ g/ml doxycycline, 100 ng/ml Human IL-34 and 10 ng/ml Human GM-CSF, 50  
762 ng/ml Human M-CSF (Peprotech; Cat. No. 300-25) and 50 ng/ml Human TGFB1 (Peprotech;  
763 Cat. No. 100-21C). On Day 8, the media was replaced with fresh iTF-Microglia medium. iTF-  
764 Microglia can be cultured for at least 12 more days in iTF-Microglia medium with full medium  
765 changes every 3-4 days. Cells were assayed on day 8, day 9 or day 15 in most experiments.  
766 When differentiating the inducible CRISPRi/a iTF-Microglia, the media was supplemented with  
767 50 nM trimethoprim (MP Biomedical, LLC; Cat. No. 195527) and changed every two days to  
768 maintain strong knockdown/overexpression.  
769 For dissociation, iTF-Microglia were washed once with PBS before adding TrypLE Express  
770 (Gibco; Cat. No. 12605-028) and incubating for 10 min at 37 °C. Cells were diluted 1:3 in  
771 Advanced DMEM/F12 and spun down at 220g for 5 min before resuspending in appropriate  
772 media.

773  
774 **Doxycycline removal assay after Day 8 of differentiation**

775 10,000 iTF-iPSCs were seeded into 96-well Flat Clear Bottom White Polystyrene Poly-D-Lysine  
776 Coated Microplates (Corning; Cat. No. 3843) and differentiated into iTF-Microglia as described  
777 above. At Day 8 of the differentiation, the media of iTF-Microglia was replaced with either i)  
778 full media change of iTF-Microglia medium containing 2 µg/ml doxycycline, or ii) full media  
779 change of iTF-Microglia medium containing no doxycycline, or iii) half media changes of iTF-  
780 Microglia medium containing no doxycycline. This media-replacing paradigm was repeated  
781 every three days until Day 15. Microglia survival was assessed by performing the CellTiter Glo  
782 2.0 (Promega; Cat. No. G9242) assay according to the manufacturer's instructions.  
783 Luminescence signal was recorded with the M5 plate reader (SpectroMax).

784  
785 **Differentiation and culture of iPSC-derived microglia following the protocol by Brownjohn**  
786 **and colleagues.** Brownjohn iPSC-Microglia (Brownjohn-iMG) were differentiated from dCas9-  
787 KRAB iPSCs (AICS-0090, Allen Cell Collection) using the published protocol<sup>22</sup> with minor  
788 modifications. In brief, iPSCs (cultured in Stem Flex media with colonies at 60-80% confluency)  
789 were dissociated to single cells with Accutase, collected and plated at 10,000 cells per well in 96-  
790 well ultra-low attachment, round bottom plates (Corning; Cat. No. 7007) in 100 µl embryoid  
791 body medium (10 mM ROCK inhibitor, 50 ng/mL BMP-4 (Peprotech; Cat. No. 120-05), 20  
792 ng/mL SCF (Peprotech; Cat. No. 300-07), and 50 ng/mL VEGF (Peprotech; Cat. No. 100-20) in  
793 E8 medium), and then subjected to centrifugation at 300g for 3 min. Embryoid bodies were  
794 cultured for 4 days, with a half medium change after 2 days. On day 4, embryoid bodies were  
795 carefully collected and transferred into a 15 ml conical tube, and left to settle at the bottom. The  
796 embryoid media was aspirated and 15 to 20 embryoid bodies were plated per well in 6-well  
797 plates and cultured in 3 mL hematopoietic medium (2 mM GlutaMax, 1x Anti-Anti, 55 mM 2-  
798 mercaptoethanol (BioRad; Cat. No. 1610710), 100 ng/mL M-CSF, and 25 ng/mL Human IL-3  
799 (Peprotech; Cat. No. 200-03) in X-Vivo 15 (Lonza; Cat. No. BE02-060F). Two thirds of the  
800 media was exchanged every 3-4 days. Microglia progenitors were harvested from suspension  
801 after 14-21 days and plated onto PDL-coated plates in microglia maturation media (2 mM  
802 GlutaMax, 1x Anti-Anti, 100 ng/mL IL-34, and 10 ng/mL GM-CSF in Advanced RPMI-1640  
803 (Gibco; Cat. No. 12633012)). Microglia progenitors were further differentiated for 8 days with  
804 full medium change every 2–3 days before using them for experiments.

805  
806 **iTF-Microglia coculture with iNeurons.** iPSC-derived neurons (iNeurons) were differentiated  
807 from WTC11 iPSCs engineered to express NGN2 under a doxycycline-inducible system in the  
808 AAVS1 safe harbor locus as previously described<sup>15, 84</sup> with minor modifications as follows:  
809 iPSCs were maintained and dissociated as described above and replated on Matrigel coated  
810 dishes in N2 Pre-Differentiation Medium. After three days, hereafter Day 0, the pre-  
811 differentiated neurons were dissociated to single cells with Accutase, collected, and plated at  
812 10,000 cells per well in PDL-coated 96-well plates in BrainPhys Neuronal Medium (BrainPhys  
813 (STEMCELL Technologies; Cat. No. 05790) as the base, 0.5x N2 supplement (Thermo Fisher;  
814 Cat. No. 17502-048), 0.5x B27 Supplement (GIBCO/Thermo Fisher Scientific; Cat. No. 17504-  
815 044), 10ng/mL NT-3 (PeproTech; Cat. No. 450-03), 10ng/mL BDNF, 1mg/mL Mouse laminin  
816 (Thermo Fisher; Cat. No. 23017-015), and 2mg/mL doxycycline. On Day 3, a full media change  
817 was performed. On day 7, half the media was removed, and an equal volume of BrainPhys  
818 Neuronal Medium was added. On day 14, half the media was removed and an equal volume of  
819 BrainPhys Neuronal Medium containing Day 8 iTF-Microglia expressing Lck-mNeonGreen and  
820 supplemented with 2X the cytokines of the iTF-Microglia medium was added. 3,000 iTF-



821 Microglia were added to each well and immunostaining experiments were performed after one  
822 day.

823  
824 **Lentiviral transduction of iPSCs with sgRNA constructs.** Individual or pooled sgRNAs were  
825 introduced into CRISPRi- or CRISPRa-iPSCs via lentiviral delivery using TransIT Lenti  
826 Reagent (Mirus Bio LLC; Cat. No. MIR 6600) according to manufacturer's protocol. Cells were  
827 selected with 2 µg/ml Puromycin (Gibco; Cat. No. A11138-03) for 2 - 4 days and recovered 2 - 4  
828 days until MOI >0.9 as determined by flow cytometry of sgRNA-BFP fluorescence. sgRNA  
829 protospacer sequences are provided in Supplementary Table 10.

830  
831 **qPCR.** To quantify *TFRC*, *INPP5D* or *PICALM* knockdown or *CXCR4*, *CD209* or *PFN1*  
832 overexpression, lysed cell pellets from human iPSCs or iTF-Microglia were thawed on ice, and  
833 total RNA was extracted using the Quick-RNA Miniprep Kit (Zymo; Cat. No. R1054). cDNA  
834 was synthesized with the SensiFAST cDNA Synthesis Kit (Bioline; Cat. No. 65054). Samples  
835 were prepared for qPCR in technical triplicates in 5 µL reaction volumes using SensiFAST  
836 SYBR Lo-ROX 2X master mix (Bioline; Cat. No. BIO-94005), custom qPCR primers from  
837 Integrated DNA Technologies used at a final concentration of 0.2 µM, and cDNA diluted at 1:3.  
838 Quantitative real-time PCR was performed on an Applied Biosystems QuantStudio 6 Pro Real-  
839 Time PCR System with the following Fast 2-Step protocol: (1) 95° C for 20 s; (2) 95° C for 5 s  
840 (denaturation); (3) 60°C for 20 s (annealing/extension); (4) repeat steps 2 and 3 for a total of 40  
841 cycles; (5) 95°C for 1 s; (6) ramp 1.92°C/s from 60°C to 95°C to establish melting curve.  
842 Expression fold changes were calculated using the  $\Delta\Delta C_t$  method normalizing to housekeeping  
843 gene *GAPDH*. Primer sequences are provided in Supplementary Table 10.

844  
845 **Cell surface protein staining for flow cytometry.** Dissociated and resuspended iTF-Microglia  
846 were blocked for 15 min with 1:20 Human FC Block (BD Biosciences; Cat. No. 564220) and  
847 then stained with 1:66 PE/Cy7 anti-human CD184 (CXCR4) (BioLegend; Cat. No. 306514) for  
848 CRISPRa validation or 1:66 PE-Cy7 anti-human CD71 (TFRC) (BioLegend; Cat. No. 334112)  
849 for CRISPRi validation for 30 min in the dark. For the CD38 screen and validation experiments,  
850 iTF-Microglia were stained with 1:200 anti-hCD38 PE (R&D Systems; Cat. No. FAB2404P).  
851 Cells were washed twice with DPBS before analyzing them by flow cytometry using the BD  
852 LSRFortessa X14 (BD Biosciences). Flow cytometry data was analyzed using FlowJo (FlowJo,  
853 version 10.7.1), raw median fluorescence intensity values of CD184, CD71 and CD38 stained  
854 cells were normalized to non-stained control samples and data was plotted as fold change using  
855 Prism 8 (GraphPad, version 8.4.2).

856  
857 **Intracellular protein staining for flow cytometry.** iTF-Microglia were treated for 6 h with  
858 1:2000 GolgiPlug™ (BD; Cat. No. 555029) or DMSO as control before dissociating. Cells were  
859 fixed and permeabilized with the eBioscience Intracellular Fixation and Permeabilization Buffer  
860 Set (Invitrogen; Cat. No. 88-8824-00) according to the manufacturer's instructions. Cells were  
861 stained with 1:75 Anti-Hu Osteopontin (SPP1) eFluor 660 (eBioscience; Cat. No. 50-9096-42) or  
862 1:75 Human CCL13 488 (R&D Systems; Cat. No. IC327G) or their isotype controls Mouse IgG1  
863 Control Alexa Fluor 488 conjugated (R&D Systems; Cat. No. IC002G) and Mouse IGG1 kappa  
864 Isotype (eBioscience; Cat. No. 50-4714-82) over night at 4 °C. Cells were washed twice with  
865 DPBS before analyzing them by flow cytometry using the BD FACS Celesta™ (BD  
866 Biosciences) or the BD FACSAria Fusion. Flow cytometry data was analyzed using FlowJo, raw



867 median fluorescence intensity values of Osteopontin (SPP1) and CCL13 stained cells were  
868 normalized to isotype-control samples and data was plotted as fold change using Prism 8. The  
869 gating strategy used to determine the percentage of SPP1-positive cells is shown in  
870 Supplementary Fig. 1c).

871  
872 **Immunohistochemistry.** iTF-Microglia monocultures and co-cultures were differentiated in  
873 PDL-coated 96-well plates. They were fixed with 4% Paraformaldehyde (Electron Microscopy  
874 Sciences; Cat. No. 15710) for 10 min at room temperature. After washing with DPBS 3 times,  
875 cells were permeabilized and blocked with 5% normal goat serum (Vector Laboratories; Cat. No.  
876 S-1000-20) with 0.01% Triton X-100 (TEKnova; Cat. No. T1105) in PBS for 1 hr at room  
877 temperature. Cells were then incubated with primary antibodies diluted in blocking buffer at 4 °C  
878 overnight. After that, cells were washed with DPBS 3 times and incubated with secondary  
879 antibodies diluted in blocking buffer for 1 hr at room temperature. Cells were then washed with  
880 DPBS 3 times and stained with 10 µg/ml Hoechst 33342 (Thermo Fisher Scientific; Cat. No.  
881 H3570) for 10 min. Cells were imaged using a confocal microscope (Leica SP8) or an IN Cell  
882 Analyzer 6000 (GE; Cat. No. 28-9938-51). Primary antibodies used for immunofluorescence in  
883 this study were as follows: anti-mouse 1:150 GPR34 (R&D Systems; Cat. No. MAB4617), anti-  
884 rabbit 1:1000 IBA1 (Wako; Cat. No. 019-19741), anti-rabbit 1:200 TFRC (abcam; Cat. No.  
885 ab84036), anti-rabbit 1:1000 synaptophysin (Synaptic Systems; Cat. No. 101 004). Secondary  
886 antibodies used in this study were as follows: goat anti-rabbit IgG Alexa Fluor 555 (1:500  
887 dilution; abcam; Cat. No. ab150078), goat anti-mouse IgG Alexa Fluor 488 (1:500 dilution;  
888 abcam; Cat. No. ab150113) and goat anti-chicken IgG Alexa Fluor 647. F-actin was stained  
889 using ActinGreen™ 488 (Invitrogen; Cat. No. R37110) according to the manufacturer's  
890 protocol.

891  
892 **Synaptosome isolation and pHrodoRed labelling.** Synaptosomes were isolated from fresh  
893 Innovative Grade US Origin Rat Sprague Dawley Brain (Innovative Research, Inc.; Cat. No.  
894 IGRTSDBR) with the Syn-PER™ Synaptic Protein Extraction Reagent (Thermo Scientific™;  
895 Cat. No. 87793) according to the manufacturer's protocol with minor changes. Briefly, 10 mL of  
896 Syn-PER Reagent supplemented with 1x protease inhibitor cOmplete Mini, EDTA free (Roche;  
897 Cat. No. 11836170001) and 1x phosphatase inhibitor PhosSTOP (Roche; Cat. No. 4906845001)  
898 were added per gram of brain tissue. Dounce homogenization was performed on ice and  
899 homogenate was transferred to a conical tube and centrifuged at 1200 × g for 10 minutes at 4°C.  
900 The pellet was discarded, the supernatant was transferred to a new tube, and the centrifugation  
901 step was repeated. The supernatant was then centrifuged at 15,000 × g for 20 minutes at 4°C.  
902 The supernatant was removed and the wet pellet was weighed. The synaptosome fractions were  
903 resuspended at a concentration of 50 mg/ml. 3 µM pHrodo™ Red, succinimidyl ester (pHrodo™  
904 Red, SE) (ThermoFisher Scientific; Cat. No. P36600) was added to the synaptosome fraction and  
905 incubated for 45 min at room temperature in the dark. After diluting the solution 1:10 in DPBS,  
906 the synaptosomes were spun down at 2500 × g for 5 min. The supernatant was removed and then  
907 the synaptosomes were washed two times with DPBS. The pHrodo-labeled synaptosomes were  
908 resuspended in microglia iTF-Microglia medium at a stock concentration of 50 mg/ml and  
909 directly used for phagocytosis assays or frozen in synaptosome freezing media (5% DMSO in  
910 Advanced DMEM/F12) for later use.

911

912 **Phagocytosis assays.** Day 8 iTF-Microglia were used for all phagocytosis assays. iTF-Microglia  
913 medium was prepared with pHRedoRed-labeled synaptosomes at a concentration of 1 mg/ml or  
914 0.5 µl/ml media of Fluoresbrite Carboxylate YG 1.0 Micron Microspheres (15702-10; Cat. No.  
915 15702-10). After replacing the media with the substrate media, iTF-Microglia were incubated for  
916 1.5 h in the incubator if not otherwise stated. Cells were washed twice with DPBS, dissociated,  
917 resuspended in ice-cold DPBS, and analyzed via flow cytometry. Where indicated, actin  
918 polymerization was inhibited by pretreating cells with 5 µM Cytochalasin D (Invitrogen; Cat.  
919 No. PHZ1063) for 30 min before the addition of phagocytic substrate media. For analyzing  
920 phagocytic capabilities within microglia clusters, pHRedoRed-labeled synaptosomes at a  
921 concentration of 1 mg/ml were added to iTF-Microglia for 1.5h. Microglia were washed 3x with  
922 PBS before incubating them in iTF-Microglia media supplemented with 1:2000 GolgiPlug™  
923 (BD; Cat. No. 555029) for 4h. Cells were dissociated, fixed, and stained for CCL13 and SPP1 as  
924 described above. Flow cytometry data was analyzed using FlowJo, raw median fluorescence  
925 intensity values of phagocytosing cells were normalized to no-substrate control samples and data  
926 plotted as fold change using Prism 8.

927  
928 **Human cytokine array.** Day 8 iTF-Microglia were treated with 100 ng/ml LPS (Millipore  
929 Sigma; Cat. No. LPS25) or DPBS control. After 24 hours, the supernatant was collected and  
930 processed using the Proteome Profiler Human Cytokine Array Kit (R&D Systems; Cat. No.  
931 ARY005B), according to manufacturer's instructions. For analysis of the signals, Fiji (version  
932 2.0.0) was used to measure the integrated pixel density for each pair of duplicate dots  
933 representing a cytokine. Background signal was measured from negative control dots and then  
934 subtracted from each dot. The relative change in cytokine levels as a result of LPS-treatment was  
935 obtained by comparing corresponding cytokine signals across multiple arrays performed in  
936 tandem.

937  
938 **Live-cell imaging.** iTF-iPSCs transduced with individual sgRNAs as described above were  
939 passaged and differentiated into iTF-Microglia in the 96-well format described above. Starting  
940 on day 2 of differentiation, and continuing every two days until day 15, iTF-Microglia were  
941 stained with 10 µg/ml Hoechst 33342 for 10 min at 37 °C, washed with PBS, and imaged with  
942 the IN Cell Analyzer 6000. Using the same 96-well format as described above, Day 8 iTF-  
943 Microglia were stained for F-actin using 25 nM SiR-actin (Cytoskeleton, Inc; Cat. No. CY-  
944 SC001) probe, diluted in iTF-Microglia medium, with a 4 hour incubation at 37 °C. A full media  
945 change with iTF-Microglia medium was completed before imaging using the IN Cell Analyzer  
946 6000.

947  
948 **CellTiter Glo assay after pharmaceutical inhibition of CSF1R or MAPK14.** 10,000 iTF-  
949 iPSCs were seeded into 96-well Flat Clear Bottom White Polystyrene Poly-D-Lysine Coated  
950 Microplates (Corning; Cat. No. 3843) and differentiated into iTF-Microglia. For CSF1R  
951 inhibition, cells were treated with the CSF1R inhibitor PLX3397 at Day 8 (ApexBio; Cat. No.  
952 B5854) at indicated concentrations or DMSO control for 24h before performing the CellTiter  
953 Glo 2.0 (Promega; Cat. No. G9242) assay according to the manufacturer's instructions. For  
954 MAPK14 inhibition, cells were treated with the MAPK14 inhibitor Skepinone-L at Day 8  
955 (Selleckchem; Cat. No. 1221485831) at indicated concentrations or DMSO control for 24h  
956 before performing the CellTiter Glo 2.0 assay. Luminescence signal was recorded with the M5  
957 plate reader (SpectroMax).

958

## 959 CRISPR SCREENS

960

961 **Large-scale survival-based and FACS-based screens.** Inducible CRISPRi and CRISPRa iTF-  
962 iPSCs were infected with pooled CRISPRi or CRISPRa sgRNA libraries<sup>33</sup> targeting the  
963 druggable genome and selected for lentiviral integration with puromycin, as described above.  
964 Day 0 iTF-iPSCs, with a cell count corresponding to an average 1000x coverage per library  
965 element, were differentiated into iTF-Microglia as described above with constant TMP  
966 supplementation for dCas9 stabilization.

967 For the survival screens, Day 0 iPSCs and Day 15 iTF-Microglia were lifted with Accutase or  
968 Tryple Express, respectively. Lifted cells were harvested and subjected to sample preparation for  
969 next-generation sequencing as described below.

970 For the CD38-activation screen, Day 8 iTF-Microglia were dissociated with TrypleE and then  
971 blocked and stained with anti-PE-CD38 as described in the cell surface staining section. Cells  
972 were sorted into high and low signal population corresponding to the top 30% and the bottom  
973 30% of the CD38-PE signal distribution (gating strategy shown in Supplementary Fig. 1a).

974 For the phagocytosis FACS screen, Day 15 iTF-Microglia were incubated with PhRodo-Red  
975 synaptosomes as described in phagocytosis assay section. Cells were then dissociated with  
976 TrypleE and sorted into high and low signal population corresponding to the top 30% and the  
977 bottom 30% of the PhRodoRed signal distribution (gating strategy shown in Supplementary Fig.  
978 1b). Based on simulations, we previously found that this sorting strategy is optimal for hit  
979 detection in FACS-based screens<sup>85</sup>.

980 Cells were subjected to sample preparation for next-generation sequencing as previously  
981 described<sup>15</sup>. Briefly, for each screen sample, genomic DNA was isolated using a Macherey-  
982 Nagel Blood L kit (Macherey-Nagel; Cat. No. 740954.20). sgRNA-encoding regions were  
983 amplified and sequenced on an Illumina HiSeq-4000.

984

985 **Quant-Seq.** Cell culture medium was aspirated, cells were washed once with DPBS, and RNA  
986 lysis buffer was added directly to wells containing either Day 0 iTF-iPSCs, Day 15 iTF-  
987 Microglia +/- 50 ng/ml 24h LPS treatment, Brownjohn-iMG +/- 100 ng/ml 24h LPS treatment,  
988 or Day 15 iTF-Microglia. For assessing transcriptomic effects after *PFNI* overexpression, two  
989 different *PFNI* sgRNAs and NTC sgRNAs were transduced into inducible CRISPRa iPSCs and  
990 cells were differentiated to Day 8 iTF-Microglia. Biological triplicates for each condition  
991 (approximately 0.15 Mio cells each) were pelleted, snap frozen, and stored at -80°C. RNA was  
992 extracted using the Quick-RNA Miniprep Kit (Zymo; Cat. No. R1055). Libraries were prepared  
993 from total RNA (250-473 ng per sample) using the QuantSeq 3' mRNA-Seq Library Prep Kit for  
994 Illumina (FWD) (Lexogen; Cat. No. 015UG009V0252) following the manufacturer's  
995 instructions. Library amplification was performed with 14 total PCR cycles. mRNA-seq library  
996 concentrations (mean of  $1.13 \pm 0.66$  ng/uL) were measured with the Qubit dsDNA HS Assay Kit  
997 (Invitrogen; Cat. No. Q32851) on a Qubit 2.0 Fluorometer. Library fragment-length distributions  
998 (mean of  $287 \pm 28$  bp) were quantified with High Sensitivity D5000 Reagents (Agilent  
999 Technologies; Cat. No. 5067-5593) on the 4200 TapeStation System. The libraries were  
1000 sequenced on an Illumina NextSeq 2000 instrument with single-end reads.

1001

1002 **CROP-Seq.** A pooled sgRNA library consisting of 2 sgRNAs per targeted gene and 4 non-  
1003 targeting control sgRNAs was designed to target 39 genes which were selected hit genes from

1004 iTF-Microglia survival and FACS-based screens (Supplementary Table 5; only 1 sgRNA for  
1005 gene *DBF4* due to technical error). Briefly, top and bottom strands of sgRNA oligos were  
1006 synthesized (Integrated DNA Technologies) and annealed in an arrayed format, pooled in equal  
1007 amounts, and ligated into our optimized CROP-seq vector, as previously described<sup>15</sup>.  
1008 Inducible CRISPRi-iTF-iPSCs were infected with the pooled sgRNA library at <0.15 MOI and  
1009 then selected for lentiviral integration. Next, iTF-iPSCs were differentiated into iTF-microglia  
1010 and cultured with the addition of TMP. Day 8 iTF-Microglia were washed 3X with DPBS,  
1011 dissociated with TrypLE, and resuspended in nuclease-free water before loading onto four wells  
1012 of the 10x Chromium Controller (10x Genomics, v3.1) according to the manufacturer's protocol,  
1013 with 35,000 cells recovered per sample as the target. Sample preparation was performed using  
1014 the Chromium Next GEM Single Cell 3' Reagent Kits version 3.1 (10x Genomics, cat. no. PN-  
1015 1000121) according to the manufacturer's protocol, reserving 10-30 ng full-length cDNA to  
1016 facilitate sgRNA assignment by amplifying sgRNA-containing transcripts using hemi-nested  
1017 PCR reactions adapted from a previously published approach<sup>15, 86</sup>. cDNA fragment analysis was  
1018 performed using the 4200 TapeStation System and sgRNA enrichment libraries were separately  
1019 indexed and sequenced as spike-ins alongside the whole-transcriptome scRNA-seq libraries  
1020 using a NovaSeq 6000 using the following configuration: Read 1: 28; i7 index: 8; i5 index: 0;  
1021 Read 2: 91.

1022

## 1023 COMPUTATIONAL AND STATISTICAL ANALYSIS

1024

1025 **Primary CRISPR screen analysis.** Primary screens were analyzed using our previously  
1026 published MAGeCK-iNC bioinformatics pipeline<sup>15</sup>, available at  
1027 <https://kampmannlab.ucsf.edu/mageck-inc>. Briefly, raw sequencing reads from next-generation  
1028 sequencing were cropped and aligned to the reference using Bowtie version 0.12.9<sup>87</sup> to determine  
1029 sgRNA counts in each sample. The quality of each screen was assessed by plotting the  
1030  $\log_{10}(\text{counts})$  per sgRNA on a rank order plot using ggplot2 version 3.3.3<sup>88</sup>. Raw phenotype  
1031 scores and significance P values were calculated for target genes, as well as for 'negative-  
1032 control-quasi-genes' that were generated by random sampling with replacement of five non-  
1033 targeting control sgRNAs from all non-targeting control sgRNAs. The final phenotype score for  
1034 each gene was calculated by subtracting the raw phenotype score by the median raw phenotype  
1035 score of 'negative-control-quasi-genes' and then dividing by the standard deviation of raw  
1036 phenotype scores of 'negative-control-quasi-genes'.  
1037 A 'Gene Score' was defined as the product of phenotype score and  $-\log_{10}(\text{P value})$ . Hit genes  
1038 were determined based on the Gene Score cutoff corresponding to an empirical FDR of 10%.  
1039 Volcano plots of gene scores were generated using ggplot2 version 3.3.3<sup>88</sup>.

1040

1041 **RNA-seq analysis.** Alignment and mapping were performed using Salmon version 1.4.0<sup>89</sup>, (the -  
1042 noLengthCorrection flag was used for QuantSeq samples) and either the human reference  
1043 genome GRCh38 (Gencode, release 37), or a custom GRCh38 reference genome containing the  
1044 references for each 3TF transgene integrated in iTF-iPSCs, to obtain transcript abundance  
1045 counts. Tximport version 1.18.0<sup>90</sup> was used to obtain gene-level count estimates. Genes with  
1046 zero counts across all samples were removed from the analysis. To visualize differences in gene  
1047 expression across samples, a list of gene symbols corresponding to microglia markers, microglia  
1048 activation markers, and iPSC markers were compiled from a previous publication<sup>91</sup>; the  
1049 normalized counts of each of these genes were then standardized across samples (*i.e.* subtracting



1050 by the mean and dividing by the standard deviation) and visualized using Complex Heatmap  
1051 version 2.6.2<sup>92</sup>. To assess how iTF-Microglia compare to other iPSC-Microglia and primary  
1052 microglia from a range of previous studies<sup>17, 22, 24, 25, 93</sup>, raw fastqs obtained from the NCBI GEO  
1053 database) were subject to the same analysis pipeline stated above. Then, principal component  
1054 analysis was performed using microglia marker genes as input with DESeq2 version 1.30.1<sup>94</sup>.  
1055 For differential gene expression analysis of LPS-treated vs. PBS-treated iTF-Microglia samples  
1056 and the *PFNI* overexpression vs. NTC iTF-Microglia DESeq2 version 1.30.1<sup>94</sup> was used to  
1057 calculate the log-fold-change and p-values and perform shrinkage of log-fold-change for  
1058 downstream visualization using ggplot2 version 3.3.3<sup>88</sup>. To compare both LPS-treatment up-  
1059 regulated and down-regulated differentially expressed genes (DEGs) in iTF-Microglia and  
1060 Brownjohn-iMG, DEGs that were significant ( $p_{\text{adj}} < 0.05$ ) in at least one cell type were  
1061 visualized using VennDiagram (version 1.6.20).

1062  
1063 **CROP-seq analysis.** Alignment and gene expression quantification was performed on  
1064 scRNAseq libraries and sgRNA-enriched libraries using Cell Ranger (version 5.0.1, 10X  
1065 Genomics) with default parameters and reference genome GRCh38-3.0.0. Cellranger aggr was  
1066 used to aggregate counts belonging to the same sample across different GEM wells. The  
1067 resulting gene vs. cell barcode matrix contained 58,302 cells which had on average 41,827 reads  
1068 per cell, and a median of 3,346 genes per cell. sgRNA unique molecular identifier (UMI) counts  
1069 for each cell barcode were obtained using a previously described mapping workflow<sup>86</sup>. To  
1070 facilitate sgRNA identity assignment, a combination of demuxEM<sup>95</sup> and a z-score cut-off  
1071 method we previously described<sup>15</sup> were used such that only cells with a single sgRNA as  
1072 determined by both methods were carried forward in the analysis.

1073 The raw gene vs. barcode matrix outputted by Cell Ranger was converted into a  
1074 SingleCellExperiment (SCE) object using the read10xCounts function from the DropletUtils  
1075 package version 1.10.3<sup>96</sup> in R (version 4.0.3). sgRNA assignments were appended to the SCE  
1076 metadata and filtered to only include cells with a single sgRNA, resulting in 28,905 cells. The  
1077 SCE was converted into a Seurat object using Seurat::as.Seurat version 4.0.1<sup>97</sup>. The data was  
1078 normalized and highly variable genes were identified using Seurat::SCTransform<sup>98</sup>. For initial  
1079 data exploration, principal-component analysis was performed using Seurat::RunPCA to  
1080 determine the number of principal components to retain. UMAP dimensional reduction using  
1081 Seurat::RunUMAP and clustering using Seurat::FindNeighbors and Seurat::FindClusters were  
1082 performed on the retained principal components with resolution = 0.7.

1083 Initial data exploration revealed clusters that were not of interest due to a high proportion of  
1084 mitochondrial-encoding genes or disrupted microglia differentiation (Extended Data Fig.5A).  
1085 These clusters were removed from the downstream analysis and the remaining “microglia  
1086 cluster” population was normalized, clustered, and visualized using UMAP, as described above  
1087 with resolution = 0.25.

1088 To determine the differentially expressed genes between UMAP clusters,  
1089 Seurat::FindAllMarkers was used. Single-cell heatmaps, ridge plots, rank plots, and UMAPs  
1090 were made using Seurat::DoHeatmap, Seurat::RidgePlot, Seurat::VizDimLoadings, and  
1091 Seurat::DimPlot or Seurat::FeaturePlot, respectively.

1092 The relative proportion of cells with a given sgRNA in a given cluster compared to cells with  
1093 non-targeting control (NTC) sgRNAs in the given cluster was calculated and visualized using  
1094 Complex Heatmap version 2.6.2<sup>92</sup> (Supplemental Table 7).



1095 For each CRISPRi target gene, the population of cells with the strongest knockdown (cells with  
1096 expression of target gene less than the median expression of the target gene) was carried forward  
1097 to perform differential gene expression analysis using Seurat::FindMarkers with parameters  
1098 test.use = 't' (student's t-test), assay = "SCT", slot = "scale.data", to compare the Pearson  
1099 residuals of cells<sup>98</sup> with knockdown sgRNAs versus non-targeting control cells. Genes with an  
1100 adjusted p-value < 0.1 were deemed significant. The top 20 DEGs for each target gene which  
1101 had >50 cells comprised the set of genes used to visualize convergent pathways using Complex  
1102 Heatmap version 2.6.2<sup>92</sup>.

1103 The iTF-Microglia CROP-seq dataset was integrated with the previously published human  
1104 scRNAseq dataset (Olah-hMG)<sup>7</sup> using Seurat<sup>99</sup>. Briefly, the Olah-hMG gene vs. cell barcode  
1105 matrix and metadata were used to create a Seurat object and cells from surgery samples or with  
1106 non-microglia identities as previously determined<sup>7</sup> were removed. Normalization and  
1107 identification of highly variable genes was performed using Seurat::SCTransform with the same  
1108 parameters as the iTF-Microglia. Next, integration features (3000 features) and integration  
1109 anchors were identified for each Seurat object using Seurat::SelectIntegrationFeatures and  
1110 Seurat::FindIntegrationAnchors and subsequent integration with identified anchors was  
1111 performed using Seurat::IntegrateData. The integrated Seurat object was normalized, clustered,  
1112 and visualized using UMAP, as described above with resolution = 0.25. Gene expression was  
1113 visualized with UMAP using Seurat::FeaturePlot and the percentage of cells in the integrated  
1114 SPP1-high cluster or SPP1-low clusters of either AD brain or control brain origin was calculated  
1115 and significance was calculated on the cell counts using Fisher's exact test.

1116  
1117 **Image analysis with CellProfiler.** Pipelines and example images are compiled in supplemental  
1118 material and all analysis was performed using CellProfiler version 4.1.3. *Cell morphology*  
1119 *metrics:* Nuclei were segmented as primary objects from Hoechst images. Cell segmentations  
1120 were generated by propagating outward from nuclei objects until edges were identified in the  
1121 phalloidin images. Area and shape metrics were calculated for each cell object. *Integrated F-*  
1122 *actin intensity per cell:* for a given field of view, nuclei were segmented based on Hoechst  
1123 images and total integrated SiR-actin intensity was summed. The resulting sum was divided and  
1124 by the number of nuclei. *Longitudinal cell counts:* for a given field of view, nuclei were  
1125 segmented based on Hoechst images acquired daily. *IBA1 intensity per cell:* This metric was  
1126 determined similarly to the integrated F-actin intensity per nuclei; for a given field of view, the  
1127 total integrated intensity of the IBA1 stain was divided by the number of segmented nuclei based  
1128 on Hoechst.

### 1129 1130 **Data Availability Statement**

1131 All screen datasets and RNA-transcriptomic datasets are publicly available in the CRISPRbrain  
1132 data commons (<http://crisprbrain.org/>) (associated with Figures 1, 2, 4, 5, 6, 7 and Extended Data  
1133 Figures 1, 4, 5, 6, 7). RNA sequencing datasets reported in this paper are in the process of being  
1134 deposited on NCBI GEO. There are no restrictions on data availability.

### 1135 1136 **Code Availability Statement**

1137 The MAGeCK-iNC bioinformatics pipeline for analysis of pooled screens available at  
1138 <https://kampmannlab.ucsf.edu/mageck-inc>. The CellProfiler pipelines will be made available on  
1139 request to the corresponding authors (MK), and will also be submitted to the CellProfiler

1140 depository of published pipelines ([https://cellprofiler.org/examples/published\\_pipelines.html](https://cellprofiler.org/examples/published_pipelines.html))  
1141 upon publication.

1142

## 1143 REFERENCES

1144

1145 1. Butovsky, O. & Weiner, H.L. Microglial signatures and their role in health and disease.  
1146 *Nat Rev Neurosci* **19**, 622-635 (2018).

1147 2. Efthymiou, A.G. & Goate, A.M. Late onset Alzheimer's disease genetics implicates  
1148 microglial pathways in disease risk. *Mol Neurodegener* **12**, 43 (2017).

1149 3. Li, Q. & Barres, B.A. Microglia and macrophages in brain homeostasis and disease. *Nat*  
1150 *Rev Immunol* **18**, 225-242 (2018).

1151 4. Colonna, M. & Butovsky, O. Microglia Function in the Central Nervous System During  
1152 Health and Neurodegeneration. *Annu Rev Immunol* **35**, 441-468 (2017).

1153 5. Liddelow, S.A., *et al.* Neurotoxic reactive astrocytes are induced by activated microglia.  
1154 *Nature* **541**, 481-487 (2017).

1155 6. Rodriguez-Gomez, J.A., *et al.* Microglia: Agents of the CNS Pro-Inflammatory  
1156 Response. *Cells* **9** (2020).

1157 7. Olah, M., *et al.* Single cell RNA sequencing of human microglia uncovers a subset  
1158 associated with Alzheimer's disease. *Nat Commun* **11**, 6129 (2020).

1159 8. Mathys, H., *et al.* Temporal Tracking of Microglia Activation in Neurodegeneration at  
1160 Single-Cell Resolution. *Cell Rep* **21**, 366-380 (2017).

1161 9. Keren-Shaul, H., *et al.* A Unique Microglia Type Associated with Restricting  
1162 Development of Alzheimer's Disease. *Cell* **169**, 1276-1290.e1217 (2017).

1163 10. Srinivasan, K., *et al.* Untangling the brain's neuroinflammatory and neurodegenerative  
1164 transcriptional responses. *Nat Commun* **7**, 11295 (2016).

1165 11. Hammond, T.R., *et al.* Single-Cell RNA Sequencing of Microglia throughout the Mouse  
1166 Lifespan and in the Injured Brain Reveals Complex Cell-State Changes. *Immunity* **50**, 253-  
1167 271.e256 (2019).

1168 12. Masuda, T., *et al.* Spatial and temporal heterogeneity of mouse and human microglia at  
1169 single-cell resolution. *Nature* **566**, 388-392 (2019).

1170 13. Sankowski, R., *et al.* Mapping microglia states in the human brain through the integration  
1171 of high-dimensional techniques. *Nat Neurosci* **22**, 2098-2110 (2019).

1172 14. Kampmann, M. CRISPR-based functional genomics for neurological disease. *Nat Rev*  
1173 *Neurol* **16**, 465-480 (2020).

- 1174 15. Tian, R., *et al.* CRISPR Interference-Based Platform for Multimodal Genetic Screens in  
1175 Human iPSC-Derived Neurons. *Neuron* **104**, 239-255 e212 (2019).
- 1176 16. Tian, R., *et al.* Genome-wide CRISPRi/a screens in human neurons link lysosomal failure  
1177 to ferroptosis. *Nat Neurosci* (2021).
- 1178 17. Abud, E.M., *et al.* iPSC-Derived Human Microglia-like Cells to Study Neurological  
1179 Diseases. *Neuron* **94**, 278-293 e279 (2017).
- 1180 18. Douvaras, P., *et al.* Directed Differentiation of Human Pluripotent Stem Cells to  
1181 Microglia. *Stem cell reports* **8**, 1516-1524 (2017).
- 1182 19. Muffat, J., *et al.* Efficient derivation of microglia-like cells from human pluripotent stem  
1183 cells. *Nature medicine* **22**, 1358-1367 (2016).
- 1184 20. Pandya, H., *et al.* Differentiation of human and murine induced pluripotent stem cells to  
1185 microglia-like cells. *Nature neuroscience* **20**, 753-759 (2017).
- 1186 21. Haenseler, W., *et al.* A Highly Efficient Human Pluripotent Stem Cell Microglia Model  
1187 Displays a Neuronal-Co-culture-Specific Expression Profile and Inflammatory Response. *Stem*  
1188 *cell reports* **8**, 1727-1742 (2017).
- 1189 22. Brownjohn, P.W., *et al.* Functional Studies of Missense TREM2 Mutations in Human  
1190 Stem Cell-Derived Microglia. *Stem cell reports* **10**, 1294-1307 (2018).
- 1191 23. McQuade, A., *et al.* Development and validation of a simplified method to generate  
1192 human microglia from pluripotent stem cells. *Mol Neurodegener* **13**, 67 (2018).
- 1193 24. Chen, S.W., *et al.* Efficient conversion of human induced pluripotent stem cells into  
1194 microglia by defined transcription factors. *Stem Cell Reports* **16**, 1363-1380 (2021).
- 1195 25. Zhang, Y., *et al.* An RNA-sequencing transcriptome and splicing database of glia,  
1196 neurons, and vascular cells of the cerebral cortex. *The Journal of neuroscience : the official*  
1197 *journal of the Society for Neuroscience* **34**, 11929-11947 (2014).
- 1198 26. Bennett, M.L., *et al.* New tools for studying microglia in the mouse and human CNS.  
1199 *Proceedings of the National Academy of Sciences of the United States of America* **113**, E1738-  
1200 1746 (2016).
- 1201 27. Hickman, S.E., *et al.* The microglial sensome revealed by direct RNA sequencing. *Nature*  
1202 *neuroscience* **16**, 1896-1905 (2013).
- 1203 28. Kierdorf, K., *et al.* Microglia emerge from erythromyeloid precursors via Pu.1- and Irf8-  
1204 dependent pathways. *Nat Neurosci* **16**, 273-280 (2013).
- 1205 29. Cuevas, V.D., *et al.* MAFB Determines Human Macrophage Anti-Inflammatory  
1206 Polarization: Relevance for the Pathogenic Mechanisms Operating in Multicentric Carpotarsal  
1207 Osteolysis. *J Immunol* **198**, 2070-2081 (2017).

- 1208 30. Strohmeyer, R., Shelton, J., Lougheed, C. & Breitkopf, T. CCAAT-enhancer binding  
1209 protein- $\beta$  expression and elevation in Alzheimer's disease and microglial cell cultures. *PLoS One*  
1210 **9**, e86617 (2014).
- 1211 31. Masuda, T., *et al.* Transcription factor IRF5 drives P2X4R<sup>+</sup>-reactive microglia gating  
1212 neuropathic pain. *Nat Commun* **5**, 3771 (2014).
- 1213 32. Bohlen, C.J., *et al.* Diverse Requirements for Microglial Survival, Specification, and  
1214 Function Revealed by Defined-Medium Cultures. *Neuron* **94**, 759-773.e758 (2017).
- 1215 33. Horlbeck, M.A., *et al.* Compact and highly active next-generation libraries for CRISPR-  
1216 mediated gene repression and activation. *Elife* **5** (2016).
- 1217 34. Michaelson, M.D., *et al.* CSF-1 deficiency in mice results in abnormal brain  
1218 development. *Development* **122**, 2661-2672 (1996).
- 1219 35. Kondo, Y. & Duncan, I.D. Selective reduction in microglia density and function in the  
1220 white matter of colony-stimulating factor-1-deficient mice. *J Neurosci Res* **87**, 2686-2695  
1221 (2009).
- 1222 36. Erblich, B., Zhu, L., Etgen, A.M., Dobrenis, K. & Pollard, J.W. Absence of colony  
1223 stimulation factor-1 receptor results in loss of microglia, disrupted brain development and  
1224 olfactory deficits. *PloS one* **6**, e26317 (2011).
- 1225 37. Chitu, V., *et al.* Microglial Homeostasis Requires Balanced CSF-1/CSF-2 Receptor  
1226 Signaling. *Cell Rep* **30**, 3004-3019 e3005 (2020).
- 1227 38. Tan, F., Qian, C., Tang, K., Abd-Allah, S.M. & Jing, N. Inhibition of transforming  
1228 growth factor  $\beta$  (TGF- $\beta$ ) signaling can substitute for Oct4 protein in reprogramming and  
1229 maintain pluripotency. *J Biol Chem* **290**, 4500-4511 (2015).
- 1230 39. Butovsky, O., *et al.* Identification of a unique TGF- $\beta$ -dependent molecular and functional  
1231 signature in microglia. *Nat Neurosci* **17**, 131-143 (2014).
- 1232 40. Adler, A.S., *et al.* CDK8 maintains tumor dedifferentiation and embryonic stem cell  
1233 pluripotency. *Cancer Res* **72**, 2129-2139 (2012).
- 1234 41. Guerreiro, S., Privat, A.L., Bressac, L. & Toulorge, D. CD38 in Neurodegeneration and  
1235 Neuroinflammation. *Cells* **9** (2020).
- 1236 42. Mayo, L., *et al.* Dual role of CD38 in microglial activation and activation-induced cell  
1237 death. *J Immunol* **181**, 92-103 (2008).
- 1238 43. Wang, Y.M., *et al.* Blocking the CD38/cADPR pathway plays a double-edged role in  
1239 LPS stimulated microglia. *Neuroscience* **361**, 34-42 (2017).
- 1240 44. Tanzer, M.C., Bludau, I., Stafford, C.A., Hornung, V. & Mann, M. Phosphoproteome  
1241 profiling uncovers a key role for CDKs in TNF signaling. *Nat Commun* **12**, 6053 (2021).



- 1242 45. Henry, K.L., *et al.* CDK12-mediated transcriptional regulation of noncanonical NF- $\kappa$ B  
1243 components is essential for signaling. *Sci Signal* **11** (2018).
- 1244 46. Jin, Z., Wei, W., Yang, M., Du, Y. & Wan, Y. Mitochondrial complex I activity  
1245 suppresses inflammation and enhances bone resorption by shifting macrophage-osteoclast  
1246 polarization. *Cell Metab* **20**, 483-498 (2014).
- 1247 47. Salter, M.W. & Stevens, B. Microglia emerge as central players in brain disease. *Nat Med*  
1248 **23**, 1018-1027 (2017).
- 1249 48. Floden, A.M. & Combs, C.K. Microglia demonstrate age-dependent interaction with  
1250 amyloid-beta fibrils. *Journal of Alzheimer's disease : JAD* **25**, 279-293 (2011).
- 1251 49. Bliederhaeuser, C., *et al.* Age-dependent defects of alpha-synuclein oligomer uptake in  
1252 microglia and monocytes. *Acta Neuropathol* **131**, 379-391 (2016).
- 1253 50. Hong, S., *et al.* Complement and microglia mediate early synapse loss in Alzheimer  
1254 mouse models. *Science* **352**, 712-716 (2016).
- 1255 51. Lui, H., *et al.* Progranulin Deficiency Promotes Circuit-Specific Synaptic Pruning by  
1256 Microglia via Complement Activation. *Cell* **165**, 921-935 (2016).
- 1257 52. Gilbert, L.A., *et al.* Genome-Scale CRISPR-Mediated Control of Gene Repression and  
1258 Activation. *Cell* **159**, 647-661 (2014).
- 1259 53. Ramkumar, P., *et al.* CRISPR-based screens uncover determinants of immunotherapy  
1260 response in multiple myeloma. *Blood Adv* **4**, 2899-2911 (2020).
- 1261 54. Wu, C.H., *et al.* Mutations in the profilin 1 gene cause familial amyotrophic lateral  
1262 sclerosis. *Nature* **488**, 499-503 (2012).
- 1263 55. Schulz, D., Severin, Y., Zanotelli, V.R.T. & Bodenmiller, B. In-Depth Characterization  
1264 of Monocyte-Derived Macrophages using a Mass Cytometry-Based Phagocytosis Assay. *Sci Rep*  
1265 **9**, 1925 (2019).
- 1266 56. Zou, L., *et al.* Profilin-1 is a negative regulator of mammary carcinoma aggressiveness.  
1267 *Br J Cancer* **97**, 1361-1371 (2007).
- 1268 57. Lu, E., *et al.* Profilin 1 knockdown prevents ischemic brain damage by promoting M2  
1269 microglial polarization associated with the RhoA/ROCK pathway. *J Neurosci Res* **98**, 1198-1212  
1270 (2020).
- 1271 58. Masuda, T., Sankowski, R., Staszewski, O. & Prinz, M. Microglia Heterogeneity in the  
1272 Single-Cell Era. *Cell Rep* **30**, 1271-1281 (2020).
- 1273 59. Cappellano, G., *et al.* The Yin-Yang of osteopontin in nervous system diseases:  
1274 damage *versus* repair. *Neural Regen Res* **16**, 1131-1137 (2021).

- 1275 60. Sala Frigerio, C., *et al.* The Major Risk Factors for Alzheimer's Disease: Age, Sex, and  
1276 Genes Modulate the Microglia Response to A $\beta$  Plaques. *Cell Rep* **27**, 1293-1306.e1296 (2019).
- 1277 61. Szulzewsky, F., *et al.* Glioma-associated microglia/macrophages display an expression  
1278 profile different from M1 and M2 polarization and highly express Gpnmb and Spp1. *PLoS One*  
1279 **10**, e0116644 (2015).
- 1280 62. Geirsdottir, L., *et al.* Cross-Species Single-Cell Analysis Reveals Divergence of the  
1281 Primate Microglia Program. *Cell* **179**, 1609-1622.e1616 (2019).
- 1282 63. Zhan, L., *et al.* A MAC2-positive progenitor-like microglial population is resistant to  
1283 CSF1R inhibition in adult mouse brain. *Elife* **9** (2020).
- 1284 64. Zhan, L., *et al.* Proximal recolonization by self-renewing microglia re-establishes  
1285 microglial homeostasis in the adult mouse brain. *PLoS Biol* **17**, e3000134 (2019).
- 1286 65. Johnson, N.R., *et al.* Sex-specific life extension in tauopathy mice by CSF1R inhibition  
1287 causing selective microglial depletion and suppressed pathogenesis. *bioRxiv*,  
1288 2021.2003.2020.436288 (2021).
- 1289 66. Lambert, J.C., *et al.* Meta-analysis of 74,046 individuals identifies 11 new susceptibility  
1290 loci for Alzheimer's disease. *Nat Genet* **45**, 1452-1458 (2013).
- 1291 67. Yao, X., *et al.* Targeted genetic analysis of cerebral blood flow imaging phenotypes  
1292 implicates the INPP5D gene. *Neurobiol Aging* **81**, 213-221 (2019).
- 1293 68. Peng, Q., *et al.* TREM2- and DAP12-dependent activation of PI3K requires DAP10 and  
1294 is inhibited by SHIP1. *Sci Signal* **3**, ra38 (2010).
- 1295 69. Tsai, A.P., *et al.* INPP5D expression is associated with risk for Alzheimer's disease and  
1296 induced by plaque-associated microglia. *Neurobiol Dis* **153**, 105303 (2021).
- 1297 70. Pedicone, C., *et al.* Pan-SHIP1/2 inhibitors promote microglia effector functions essential  
1298 for CNS homeostasis. *J Cell Sci* **133** (2020).
- 1299 71. Huang, R.H., *et al.* Osteopontin Promotes Cell Migration and Invasion, and Inhibits  
1300 Apoptosis and Autophagy in Colorectal Cancer by activating the p38 MAPK Signaling Pathway.  
1301 *Cell Physiol Biochem* **41**, 1851-1864 (2017).
- 1302 72. Xu, J., *et al.* Multimodal single-cell/nucleus RNA sequencing data analysis uncovers  
1303 molecular networks between disease-associated microglia and astrocytes with implications for  
1304 drug repurposing in Alzheimer's disease. *Genome Res* (2021).
- 1305 73. Spangenberg, E., *et al.* Sustained microglial depletion with CSF1R inhibitor impairs  
1306 parenchymal plaque development in an Alzheimer's disease model. *Nat Commun* **10**, 3758  
1307 (2019).

- 1308 74. Sosna, J., *et al.* Early long-term administration of the CSF1R inhibitor PLX3397 ablates  
1309 microglia and reduces accumulation of intraneuronal amyloid, neuritic plaque deposition and  
1310 pre-fibrillar oligomers in 5XFAD mouse model of Alzheimer's disease. *Mol Neurodegener* **13**,  
1311 11 (2018).
- 1312 75. Hagan, N., *et al.* CSF1R signaling is a regulator of pathogenesis in progressive MS. *Cell*  
1313 *Death Dis* **11**, 904 (2020).
- 1314 76. Kana, V., *et al.* CSF-1 controls cerebellar microglia and is required for motor function  
1315 and social interaction. *J Exp Med* **216**, 2265-2281 (2019).
- 1316 77. Pons, V., Lévesque, P., Plante, M.M. & Rivest, S. Conditional genetic deletion of CSF1  
1317 receptor in microglia ameliorates the physiopathology of Alzheimer's disease. *Alzheimers Res*  
1318 *Ther* **13**, 8 (2021).
- 1319 78. Lin, Y.T., *et al.* APOE4 Causes Widespread Molecular and Cellular Alterations  
1320 Associated with Alzheimer's Disease Phenotypes in Human iPSC-Derived Brain Cell Types.  
1321 *Neuron* **98**, 1141-1154.e1147 (2018).
- 1322 79. TCW, J., *et al.* Cholesterol and matrisome pathways dysregulated in human  
1323 *APOE*  $\epsilon$ 4 glia. *bioRxiv*, 713362 (2019).
- 1324 80. Hasselmann, J., *et al.* Development of a Chimeric Model to Study and Manipulate  
1325 Human Microglia In Vivo. *Neuron* **103**, 1016-1033 e1010 (2019).
- 1326 81. Mancuso, R., *et al.* Stem-cell-derived human microglia transplanted in mouse brain to  
1327 study human disease. *Nature neuroscience* **22**, 2111-2116 (2019).
- 1328 82. Svoboda, D.S., *et al.* Human iPSC-derived microglia assume a primary microglia-like  
1329 state after transplantation into the neonatal mouse brain. *Proceedings of the National Academy of*  
1330 *Sciences of the United States of America* **116**, 25293-25303 (2019).
- 1331 83. Xu, R., *et al.* Human iPSC-derived mature microglia retain their identity and functionally  
1332 integrate in the chimeric mouse brain. *Nat Commun* **11**, 1577 (2020).
- 1333 84. Wang, C., *et al.* Scalable Production of iPSC-Derived Human Neurons to Identify Tau-  
1334 Lowering Compounds by High-Content Screening. *Stem cell reports* **9**, 1221-1233 (2017).
- 1335 85. Nagy, T. & Kampmann, M. CRISPulator: a discrete simulation tool for pooled genetic  
1336 screens. *BMC Bioinformatics* **18**, 347 (2017).
- 1337 86. Hill, A.J., *et al.* On the design of CRISPR-based single-cell molecular screens. *Nat*  
1338 *Methods* **15**, 271-274 (2018).
- 1339 87. Langmead, B., Trapnell, C., Pop, M. & Salzberg, S.L. Ultrafast and memory-efficient  
1340 alignment of short DNA sequences to the human genome. *Genome Biol* **10**, R25 (2009).

- 1341 88. Wickham, H. *ggplot2 : Elegant Graphics for Data Analysis*. in *Use R!*, 1 online resource  
1342 (XVI, 260 pages 232 illustrations, 140 illustrations in color (Springer International Publishing :  
1343 Imprint: Springer,, Cham, 2016).
- 1344 89. Patro, R., Duggal, G., Love, M.I., Irizarry, R.A. & Kingsford, C. Salmon provides fast  
1345 and bias-aware quantification of transcript expression. *Nat Methods* **14**, 417-419 (2017).
- 1346 90. Sonesson, C., Love, M.I. & Robinson, M.D. Differential analyses for RNA-seq: transcript-  
1347 level estimates improve gene-level inferences. *F1000Res* **4**, 1521 (2015).
- 1348 91. Hasselmann, J., *et al.* Development of a Chimeric Model to Study and Manipulate  
1349 Human Microglia In Vivo. *Neuron* **103**, 1016-1033.e1010 (2019).
- 1350 92. Gu, Z., Eils, R. & Schlesner, M. Complex heatmaps reveal patterns and correlations in  
1351 multidimensional genomic data. *Bioinformatics* **32**, 2847-2849 (2016).
- 1352 93. Guttikonda, S.R., *et al.* Fully defined human pluripotent stem cell-derived microglia and  
1353 tri-culture system model C3 production in Alzheimer's disease. *Nat Neurosci* **24**, 343-354  
1354 (2021).
- 1355 94. Love, M.I., Huber, W. & Anders, S. Moderated estimation of fold change and dispersion  
1356 for RNA-seq data with DESeq2. *Genome Biol* **15**, 550 (2014).
- 1357 95. Gaublomme, J.T., *et al.* Nuclei multiplexing with barcoded antibodies for single-nucleus  
1358 genomics. *Nat Commun* **10**, 2907 (2019).
- 1359 96. Lun, A.T.L., *et al.* EmptyDrops: distinguishing cells from empty droplets in droplet-  
1360 based single-cell RNA sequencing data. *Genome Biol* **20**, 63 (2019).
- 1361 97. Hao, Y., *et al.* Integrated analysis of multimodal single-cell data. *bioRxiv*,  
1362 2020.2010.2012.335331 (2020).
- 1363 98. Hafemeister, C. & Satija, R. Normalization and variance stabilization of single-cell RNA-  
1364 seq data using regularized negative binomial regression. *Genome Biol* **20**, 296 (2019).
- 1365 99. Stuart, T., *et al.* Comprehensive Integration of Single-Cell Data. *Cell* **177**, 1888-  
1366 1902.e1821 (2019).  
1367  
1368



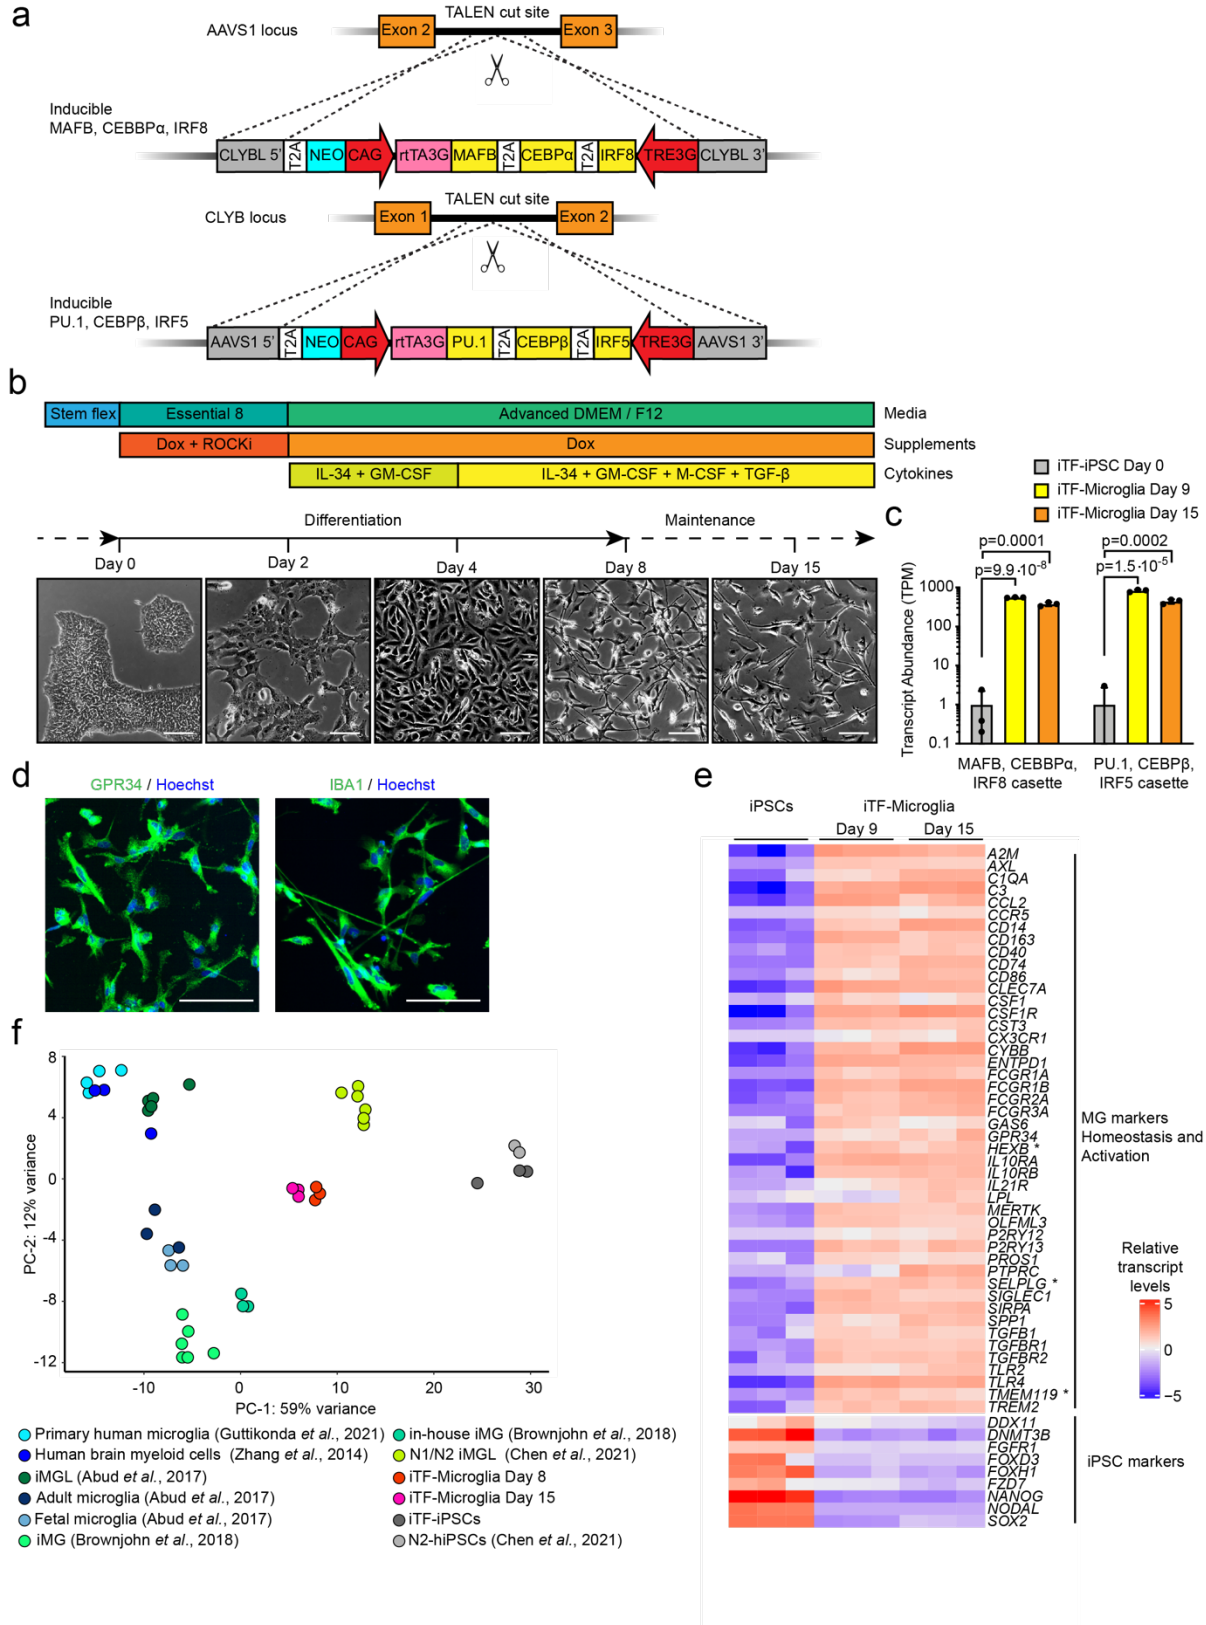

1369  
1370

Figure 1 (legend overleaf)

1371 **Figure 1: Rapid differentiation of iPSCs into microglia-like cells (iTF-Microglia) by**  
1372 **transcription factor induction. a,** Strategy for stable integration of six transcription factors  
1373 integrated in AAVS1 and CLYBL loci by TALEN-mediated integration: The doxycycline-  
1374 inducible reverse transcriptional activator (rtTA3G) is driven by the constitutive CAG promoter.  
1375 Human MAFB, CEBP $\alpha$  and IRF8 are driven by the tet response element (TRE3G) in the AAVS1  
1376 locus. Human PU.1, CEBP $\beta$  and IRF5 are driven by TRE3G in the CLYBL locus. All  
1377 transcription factors are separated from each other via T2A ribosome skipping sequences. **b,**  
1378 Overview of the differentiation process for generating iTF-Microglia. *Top:* timeline with media  
1379 and cytokines, *bottom:* representative phase-contrast images of cells on the indicated days. Scale  
1380 bar: 100  $\mu$ m. **c,** Expression of six inducible transcription factors during iTF-Microglia  
1381 differentiation. Transcript abundance (TPM) of MAFB, CEBP $\alpha$ , IRF8 cassette and the PU.1,  
1382 CEBP $\beta$ , IRF5 cassette at Day 0, Day 9 and Day 15 of differentiation. n = 3 biological replicates,  
1383 p values from two-tailed Student's t-test. **d,** Representative immunofluorescence micrographs of  
1384 iTF-Microglia on Day 8 of differentiation stained for microglia markers GPR34 and IBA1.  
1385 Nuclei were labeled by Hoechst 33342. Scale bar: 100  $\mu$ m. **e,** Expression of iPSC and microglia  
1386 marker genes in iPSCs and derived iTF- Microglia on Day 9 and Day 15 of differentiation. The  
1387 heatmap displays normalized and gene-centered transcripts per million (TPM) counts for  
1388 selected genes (rows) for 3 biological replicates of timepoints (columns). iTF-Microglia express  
1389 microglia homeostatic markers and activation markers, while losing their expression of iPSC  
1390 markers. Asterisks highlight microglia-selective markers. **f,** Principal component analysis (PCA)  
1391 on the expression of microglia marker genes of iTF-Microglia, human adult ex-vivo microglia<sup>93</sup>,  
1392 fetal and adult microglia<sup>17</sup>, human myeloid cells<sup>25</sup>, other iPSC-microglia<sup>17, 22, 24</sup> and iPSCs (this  
1393 study and ref. <sup>24</sup>). Each dot reflects an independent biological sample. Colors represent the  
1394 different cell types.  
1395

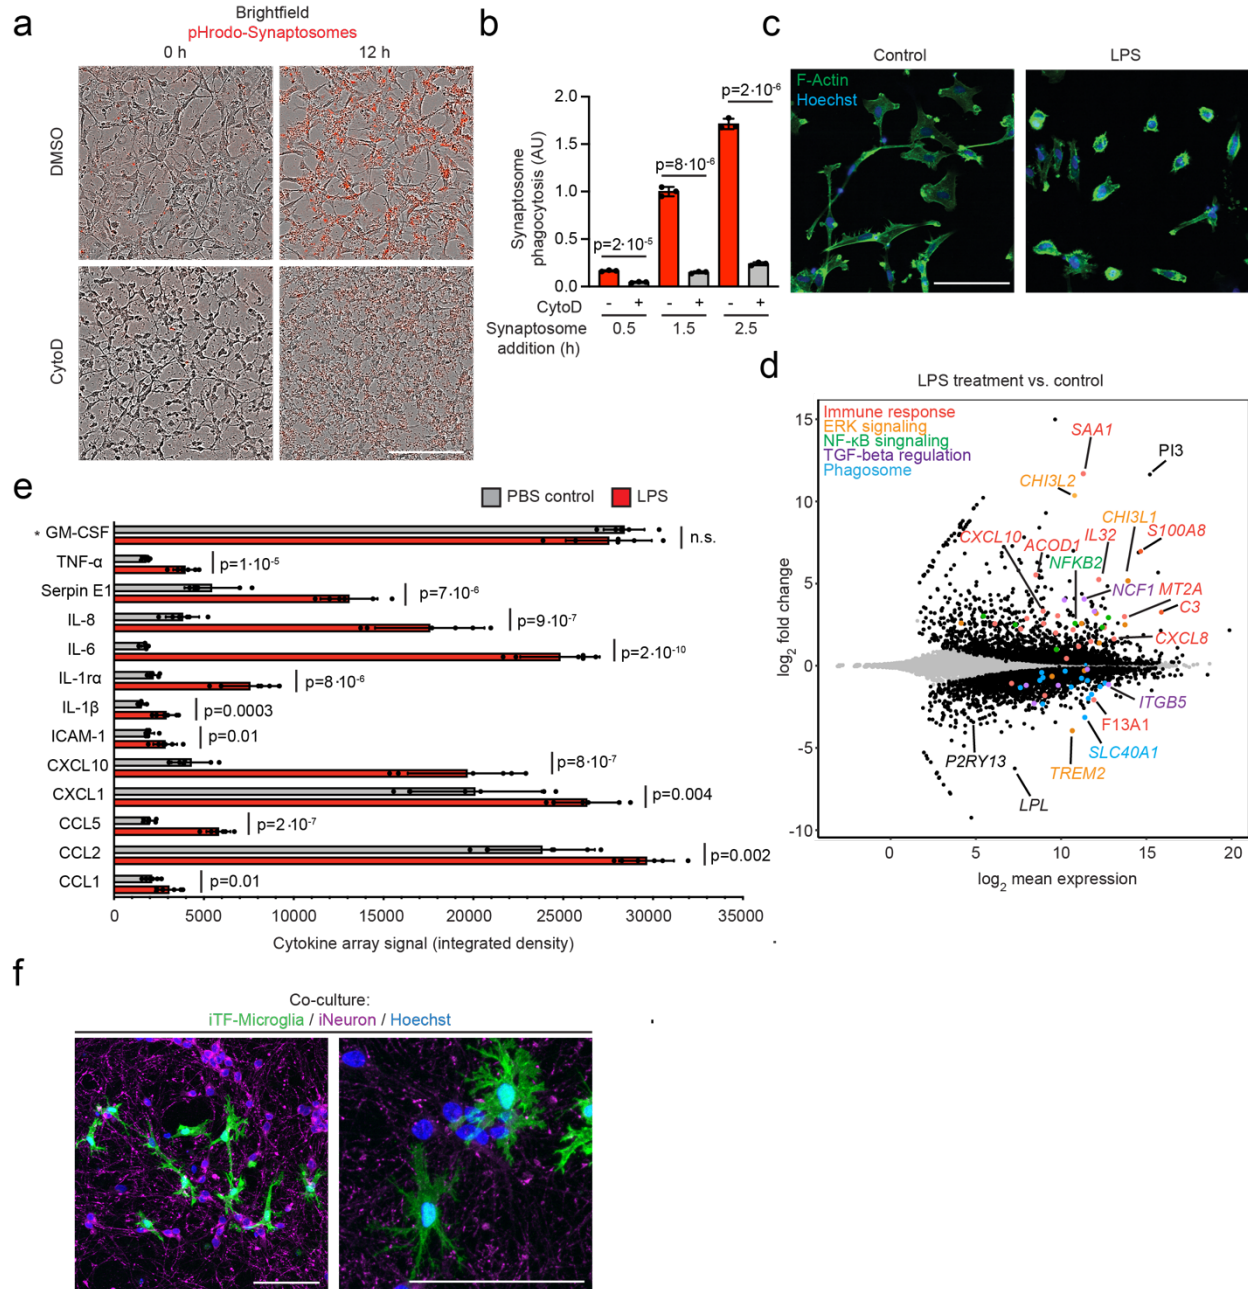

1396  
1397

1398 **Figure 2: Functional characterization of iTF-Microglia.** **a**, Phagocytosis of pHrodo-red-  
1399 labeled rat brain-derived synaptosomes by iTF-Microglia. Representative images at 0 h and 12 h  
1400 after synaptosome addition are shown. Treatment with 5  $\mu$ M actin polymerization inhibitor  
1401 Cytochalasin D decreases phagocytosis. Scale bar: 100  $\mu$ m. **b**, Phagocytosis of pHrodo-labeled  
1402 rat brain-derived synaptosomes with or without Cytochalasin D treatment was quantified by flow  
1403 cytometry at 0.5 h, 1.5 h and 2.5 h after synaptosome addition (mean  $\pm$  sd, n = three biological  
1404 replicates; p values from two-tailed Student's t-test). **c**, Morphological changes of iTF-Microglia  
1405 after LPS treatment are visualized by fluorescence microscopy. Samples were treated for 24 h  
1406 with 100 ng/ml LPS or buffer control and fixed samples were stained with AlexaFluor 488-

1407 phalloidin for F-actin (green) and with Hoechst 33342 for nuclei (blue). Scale bar: 100  $\mu\text{m}$ . **d**,  
1408 Transcriptomic changes caused by 50 ng/ml lipo-polysaccharide (LPS) treatment in Day 15 iTF-  
1409 Microglia (n = three biological replicates). Differentially expressed genes ( $p_{\text{adj}} < 0.05$ ) are  
1410 labeled in black (increase). Other colors label genes associated with specific pathways that are  
1411 discussed in the main text. **e**, Cytokines secreted by iTF-Microglia. Analysis of cytokine array  
1412 signal (integrated density of dot blots) from supernatants of cultures treated with LPS or buffer  
1413 control (mean  $\pm$  sd, n = 6 biological replicates; p values from two-tailed Student's t-test).  
1414 Asterisk: GM-CSF is a component of the culture media. **f**, Co-culture with iPSC-derived  
1415 excitatory neurons promotes ramified morphology of iTF-Microglia. Representative fluorescence  
1416 micrographs at low and high magnification of Day 9 iTF- Microglia after 24 hours in co-culture.  
1417 iTF- Microglia express membrane-localized Lck-mNeonGreen (green). Neurons are stained for  
1418 the pre-synaptic marker synaptophysin (magenta). Nuclei are stained with Hoechst 33342 (blue).  
1419 Scale bars = 100  $\mu\text{m}$ .  
1420  
1421



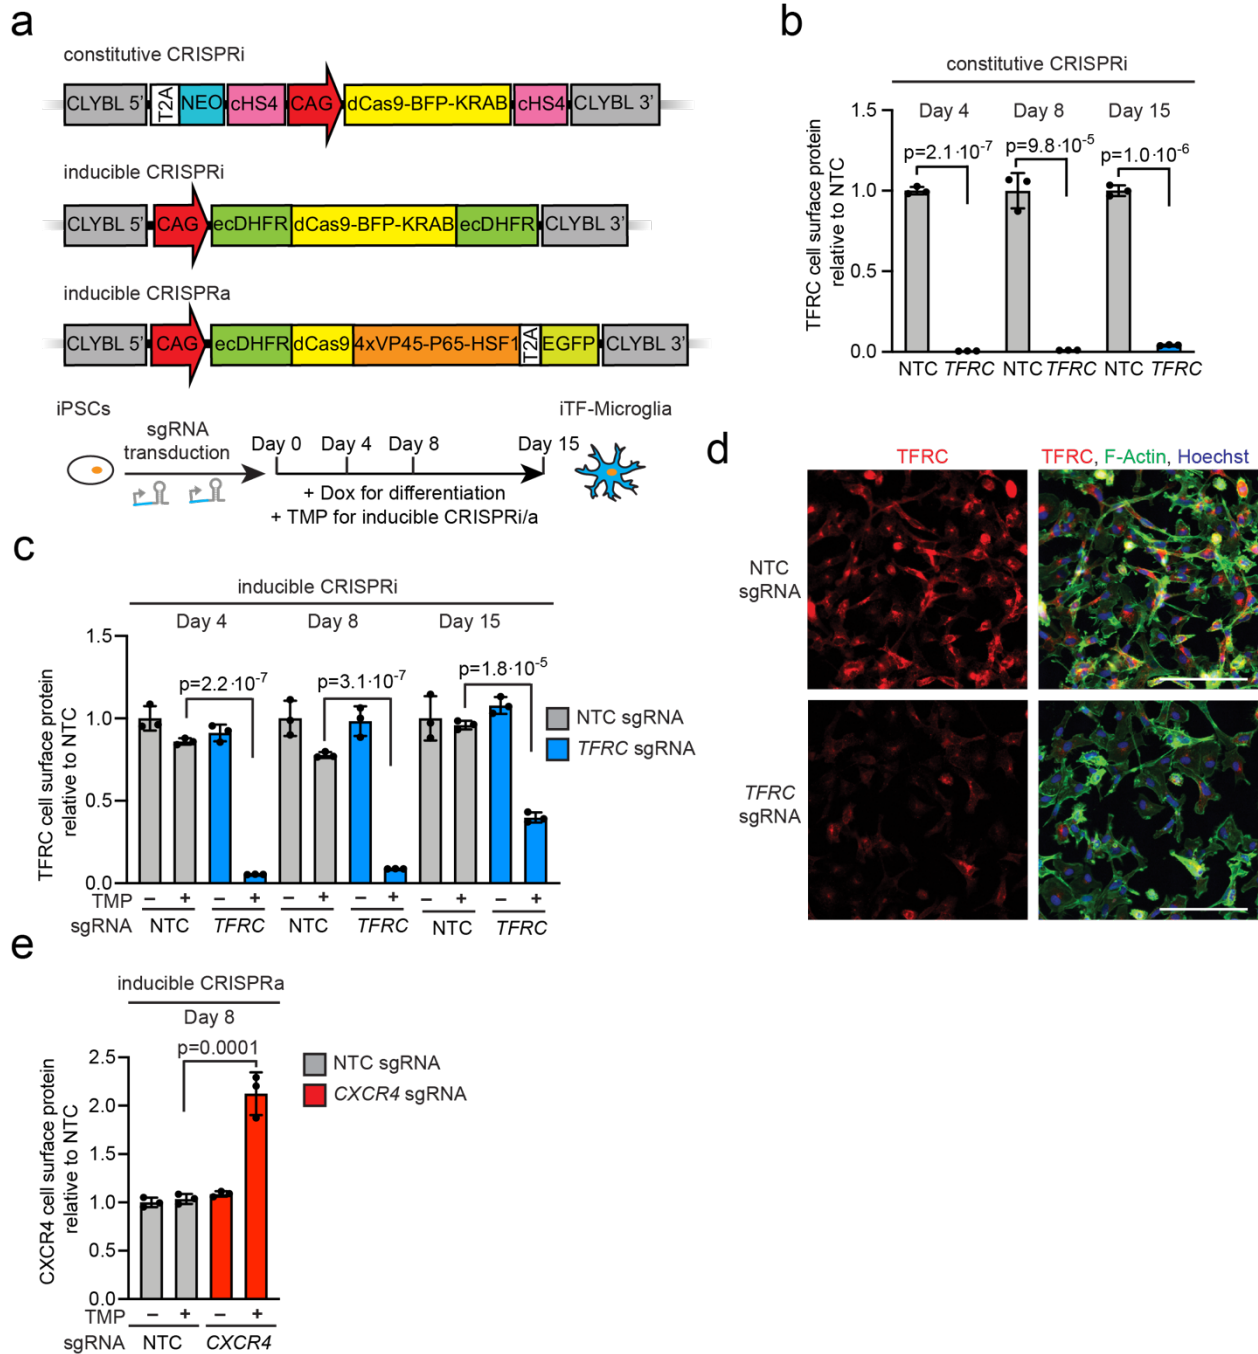

1422  
1423

1424 **Figure 3: Gene knockdown and overexpression by CRISPRi and CRISPRa in iTF-**  
 1425 **Microglia. a**, Strategies for constitutive and inducible CRISPR interference (CRISPRi)/CRISPR  
 1426 activation (CRISPRa) in iTF-Microglia. *Top*: For constitutive CRISPRi, a dCas9-BFP-KRAB  
 1427 construct (catalytically dead Cas9 (dCas9) fused to BFP and the KRAB transcriptional repressor  
 1428 domain) is expressed from the constitutive CAG promoter integrated into the CLYBL safe-  
 1429 harbor locus. *Middle*: For inducible CRISPRi, dCas9-BFP-KRAB is tagged with ecDHFR  
 1430 degress. *Bottom*: For inducible CRISPRa, CAG promoter-driven ecDHFR-dCas9-VPH was  
 1431 stably integrated into the CLYBL locus. VPH, activator domains containing 4X repeats of VP48,  
 1432 P65 and HSF1. Addition of trimethoprim (TMP) stabilizes the inducible CRISPRi/a machineries.

1433 **b,c**, Functional validation of (b) constitutive or (c) inducible CRISPRi activity via flow  
1434 cytometry of TFRC surface protein level stained iTF-Microglia expressing a TFRC-targeting  
1435 sgRNA or a non-targeting control (NTC) sgRNA at different days of differentiation (mean +/-  
1436 sd, n = 3 biological replicates; p values from two-tailed Student's t-test). (c) TMP was added to  
1437 induce CRISPRi activity where indicated. **d**, Functional validation of inducible CRISPRi activity  
1438 via TFRC immunofluorescence (IF) microscopy on Day 8. Top row, non-targeting (NTC)  
1439 sgRNA. Bottom row, sgRNA targeting *TFRC*. TFRC: red, F-actin: green, nuclei: blue. Scale bar  
1440 = 100  $\mu$ m. **e**, Functional validation of inducible CRISPRa activity via flow cytometry of CXCR4  
1441 surface protein level staining in iTF-Microglia expressing *CXCR4* sgRNA or non-targeting  
1442 control (NTC) sgRNA (mean +/- sd, n = 3 biological replicates; p values from two-tailed  
1443 Student's t-test). TMP was added to induce CRISPRa activity where indicated.  
1444

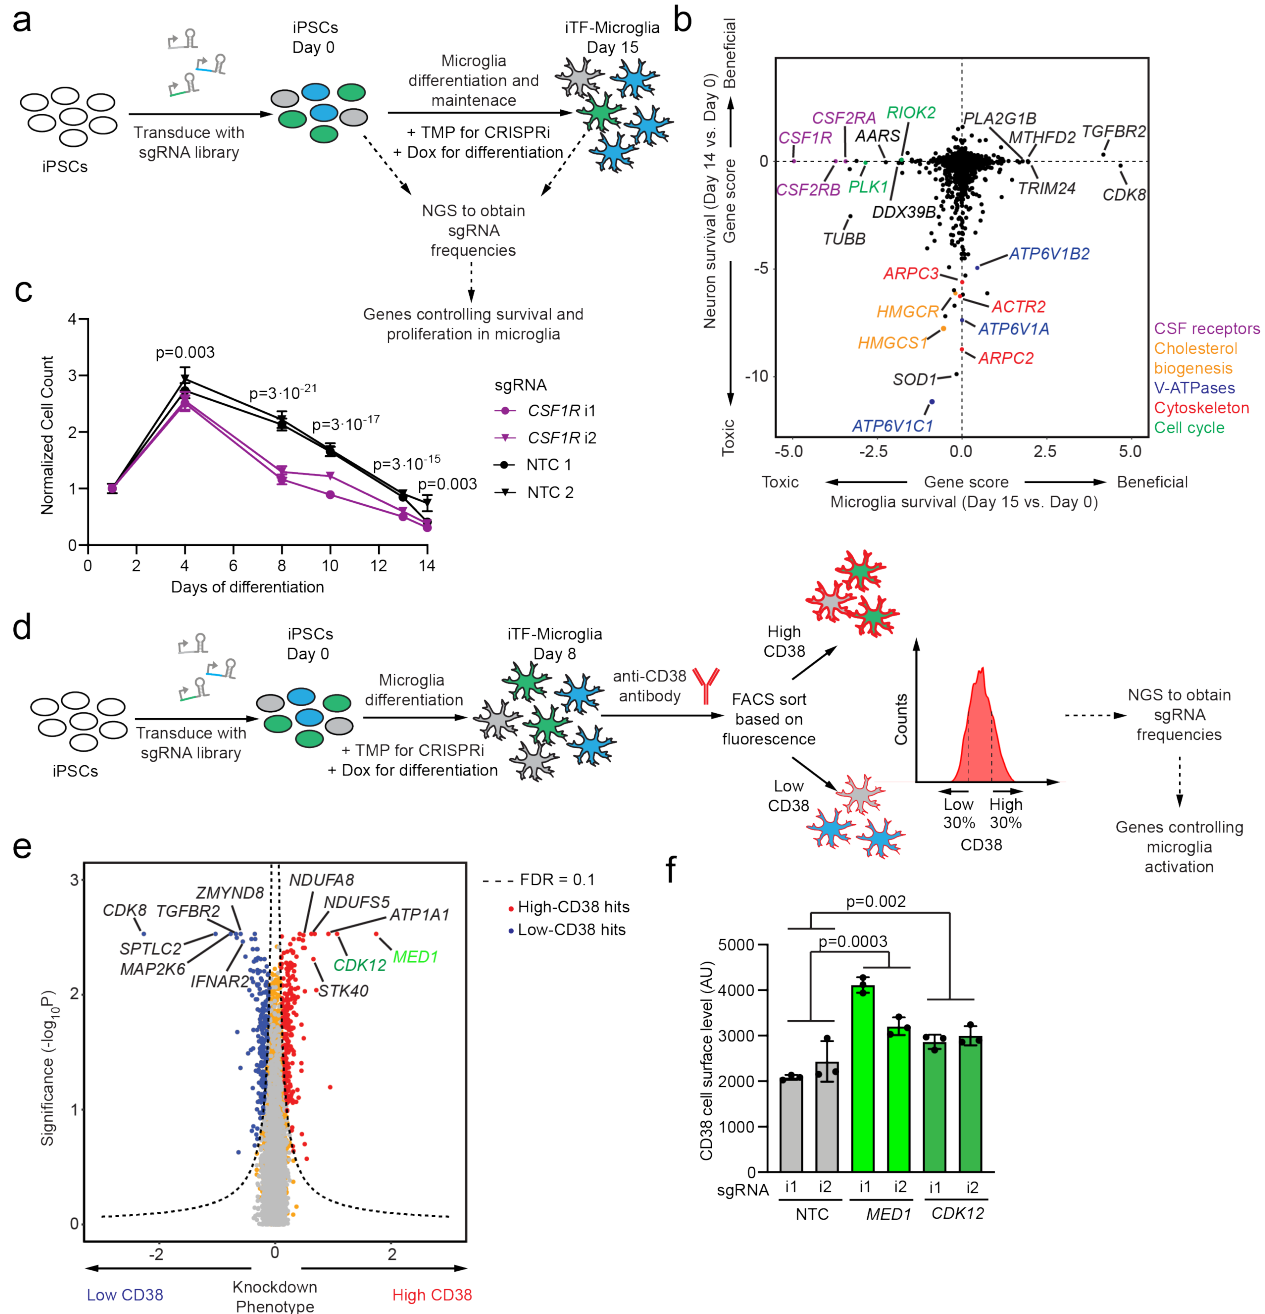

1445  
1446

**Figure 4: Identification of modifiers of survival and inflammation by CRISPRi screens.**

1447 **a**, Strategy for the CRISPRi screen to identify modifiers of survival/proliferation. iPSCs  
1448 expressing the inducible CRISPRi construct were transduced with an sgRNA library  
1449 targeting the “druggable genome”. On Day 0, doxycycline and cytokines were added to induce microglial  
1450 differentiation and TMP was added to induce CRISPRi activity. Samples of cell populations  
1451 were taken at Day 0 and at Day 15 and frequencies of the cells expressing a given sgRNA were  
1452 determined by next-generation sequencing (NGS) to calculate Gene Scores quantifying the  
1453 survival/proliferation phenotype for each gene knockdown. **b**, Comparison of Gene Scores from  
1454 CRISPRi survival screens in iTF-Microglia (this study) vs. iPSC-derived neurons<sup>15</sup>. Each dot  
1455 represents a gene; genes are color-coded by pathways. **c**, Validation of the phenotype of CSF1R

1457 knockdown. iTF-Microglia transduced with *CSF1R*-targeting or non-targeting control (NTC)  
1458 sgRNAs were imaged on different days after differentiation, and live cells were quantified based  
1459 on staining with Hoechst 33342. Data is shown as mean +/- sd, n = three wells per group, 7 fields  
1460 were imaged for each well. **d**, Strategy for a CRISPRi screen to identify modifiers of the  
1461 expression of CD38, a marker of reactive microglia. iPSCs expressing the inducible CRISPRi  
1462 construct were transduced with the druggable genome sgRNA library. On Day 0, doxycycline and  
1463 cytokines were added to induce microglial differentiation, and TMP was added to induce  
1464 CRISPRi activity. On Day 8, iTF-Microglia were stained for cell-surface levels of CD38 and  
1465 sorted by FACS into populations with low (bottom 30%) and high (top 30%) CD38 levels.  
1466 Frequencies of iTF-Microglia expressing a given sgRNA were determined in each population by  
1467 NGS. **e**, Volcano plot indicating knockdown phenotype and statistical significance (Mann-  
1468 Whitney U test) for genes targeted in the CD38 level screen. Dashed line indicates the cut-off for  
1469 hit genes (FDR = 0.1). Hit genes are shown in blue (knockdown decreases CD38 level) or red  
1470 (knockdown increases CD38 level), non-hit genes are shown in orange and “quasi-genes”  
1471 generated from random samples of non-targeting control sgRNAs are shown in grey. Hits of  
1472 interest are labeled. **f**, Validation of the phenotype of *MED1* and *CDK12* knockdown. CD38 cell  
1473 surface levels measured by flow cytometry of Day 8 iTF-Microglia targeting *MED1*, *CDK12*  
1474 compared to NTC sgRNA. n = 3 biological replicates; p values from two-tailed Student’s t-test.  
1475  
1476  
1477



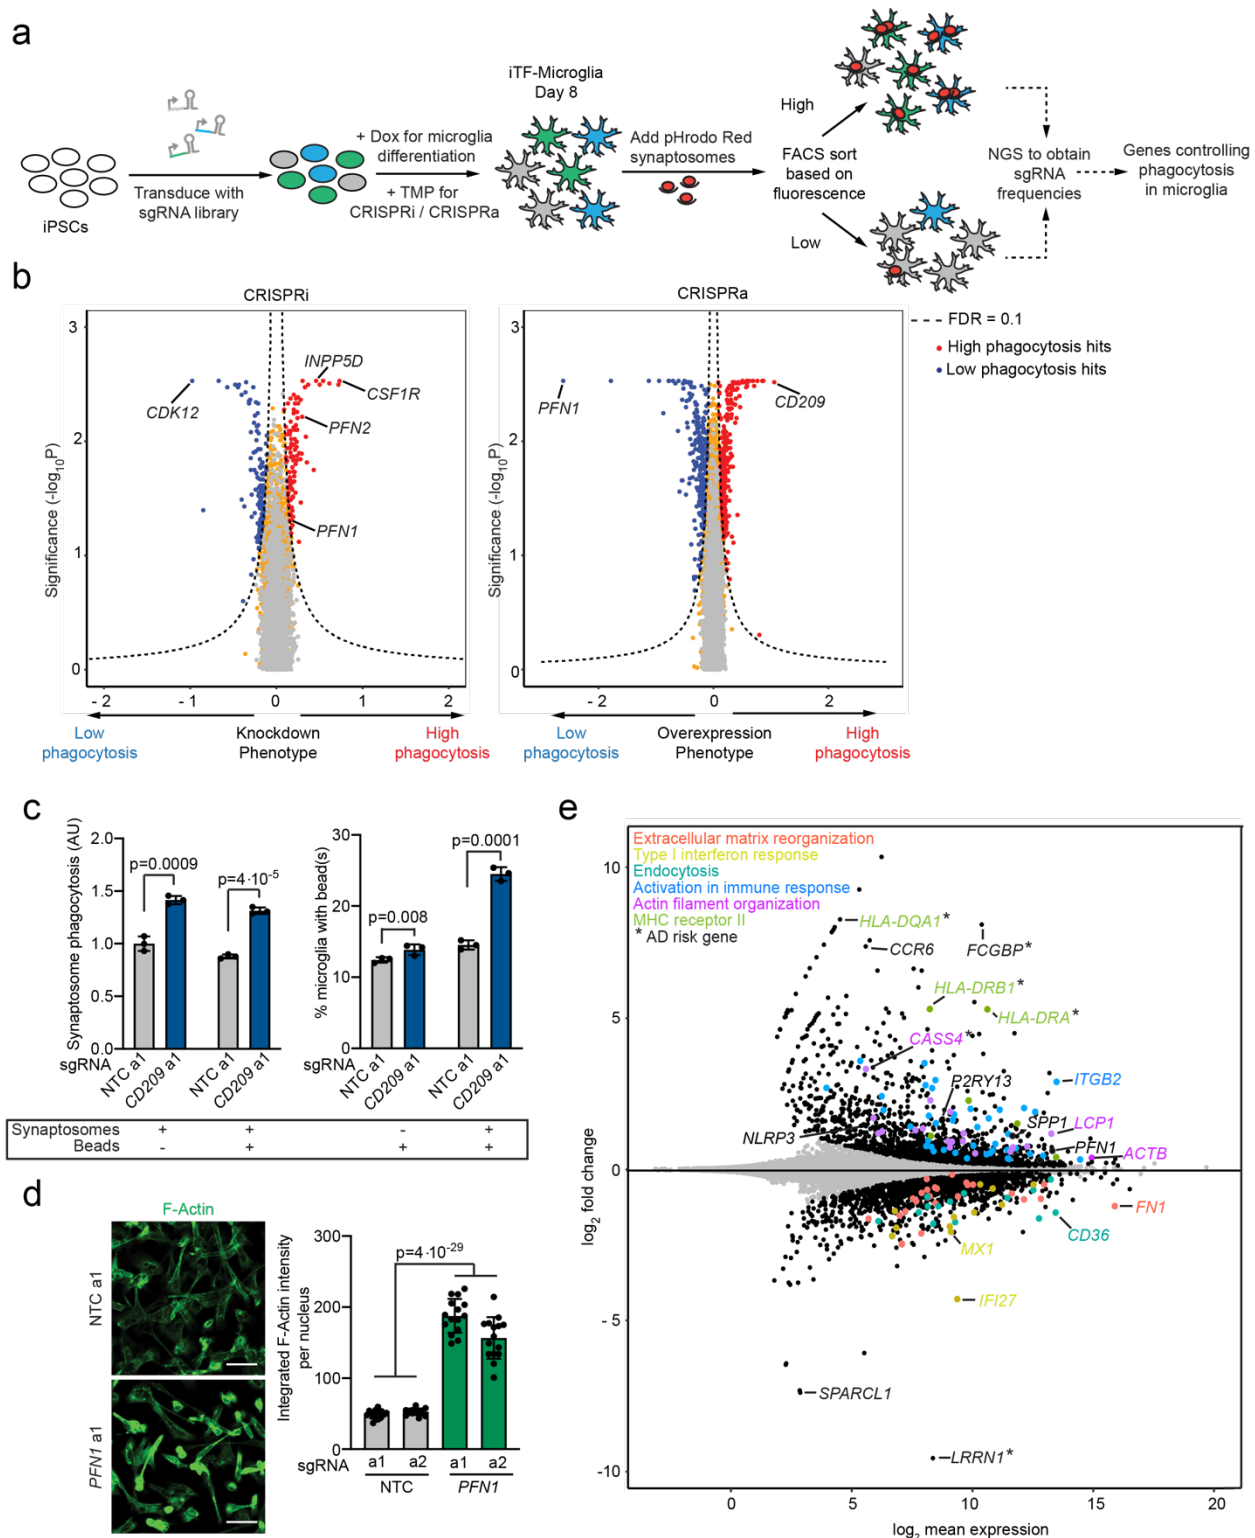

1478  
1479  
1480  
1481  
1482  
1483

**Figure 5: Identification of modifiers of phagocytosis by CRISPRi and CRISPRa screens.**  
**a**, Schematic of the screening strategy to identify modifiers of synaptosome phagocytosis. iPSCs expressing inducible CRISPRi or CRISPRa constructs were transduced with an sgRNA library targeting the druggable genome. On Day 0, doxycycline and cytokines were added to induce microglial differentiation and TMP was added to induce CRISPRi activity. On Day 8, rat

1484 synaptosomes labeled with pHrodo Red were added to the cells for 1.5 h and iTF-Microglia were  
1485 sorted based on fluorescence. Frequencies of cells expressing a given sgRNA in the low-  
1486 fluorescence and high-fluorescence populations were determined by next-generation sequencing  
1487 (NGS). **b**, Volcano blots summarizing knockdown and overexpression phenotypes and statistical  
1488 significance (Mann-Whitney U test) for genes targeted in the pooled phagocytosis screens. Left,  
1489 CRISPRi screen: right, CRISPRa screen. Dashed lines: Gene Score cutoff for hit genes (FDR =  
1490 0.1). Hit genes are shown in blue (knockdown decreases phagocytosis) or red (knockdown  
1491 increases phagocytosis), non-hit genes are shown in orange and “quasi-genes” generated from  
1492 random samples of non-targeting control sgRNAs are shown in grey. Hits of interest are labeled.  
1493 **c**, Competitive phagocytosis assay to test substrate specificity of *CD209* overexpression. Flow  
1494 cytometry measurement of phagocytosis of pHrodo-Red-labelled synaptosomes (*Left*, either  
1495 synaptosomes alone or together with beads) and green, fluorescent beads (*Right*, either beads  
1496 alone or together with synaptosomes) by iTF-Microglia expressing either non-targeting control  
1497 (NTC) sgRNAs or sgRNAs targeting *CD209*. Values represent mean +/- sd of n=3. Data was  
1498 analyzed using two-tailed Student’s t-test. **d**, Representative fluorescent images demonstrating  
1499 higher F-actin staining in CRISPRa iTF-microglia at Day 8 with *PFN1* sgRNAs compared to  
1500 non-targeting control (NTC) sgRNAs (left). Right, integrated F-actin intensity per cell of  
1501 CRISPRa iTF-Microglia at Day 8 with *PFN1* sgRNAs or non-targeting control (NTC) sgRNAs.  
1502 (mean +/- sd, n = 5 fields of view from three different wells per sgRNA. P values from two-  
1503 tailed Student’s t-test. **e**, Transcriptomic changes caused by *PFN1* overexpression in Day 8 iTF-  
1504 Microglia (n = 3 biological replicates). Differentially expressed genes ( $p_{\text{adj}} < 0.05$ ) are labelled in  
1505 black. Other colors label genes associated with specific pathways that are discussed in the main  
1506 text. Alzheimer’s disease (AD) risk genes are labelled with an asterisk.  
1507  
1508

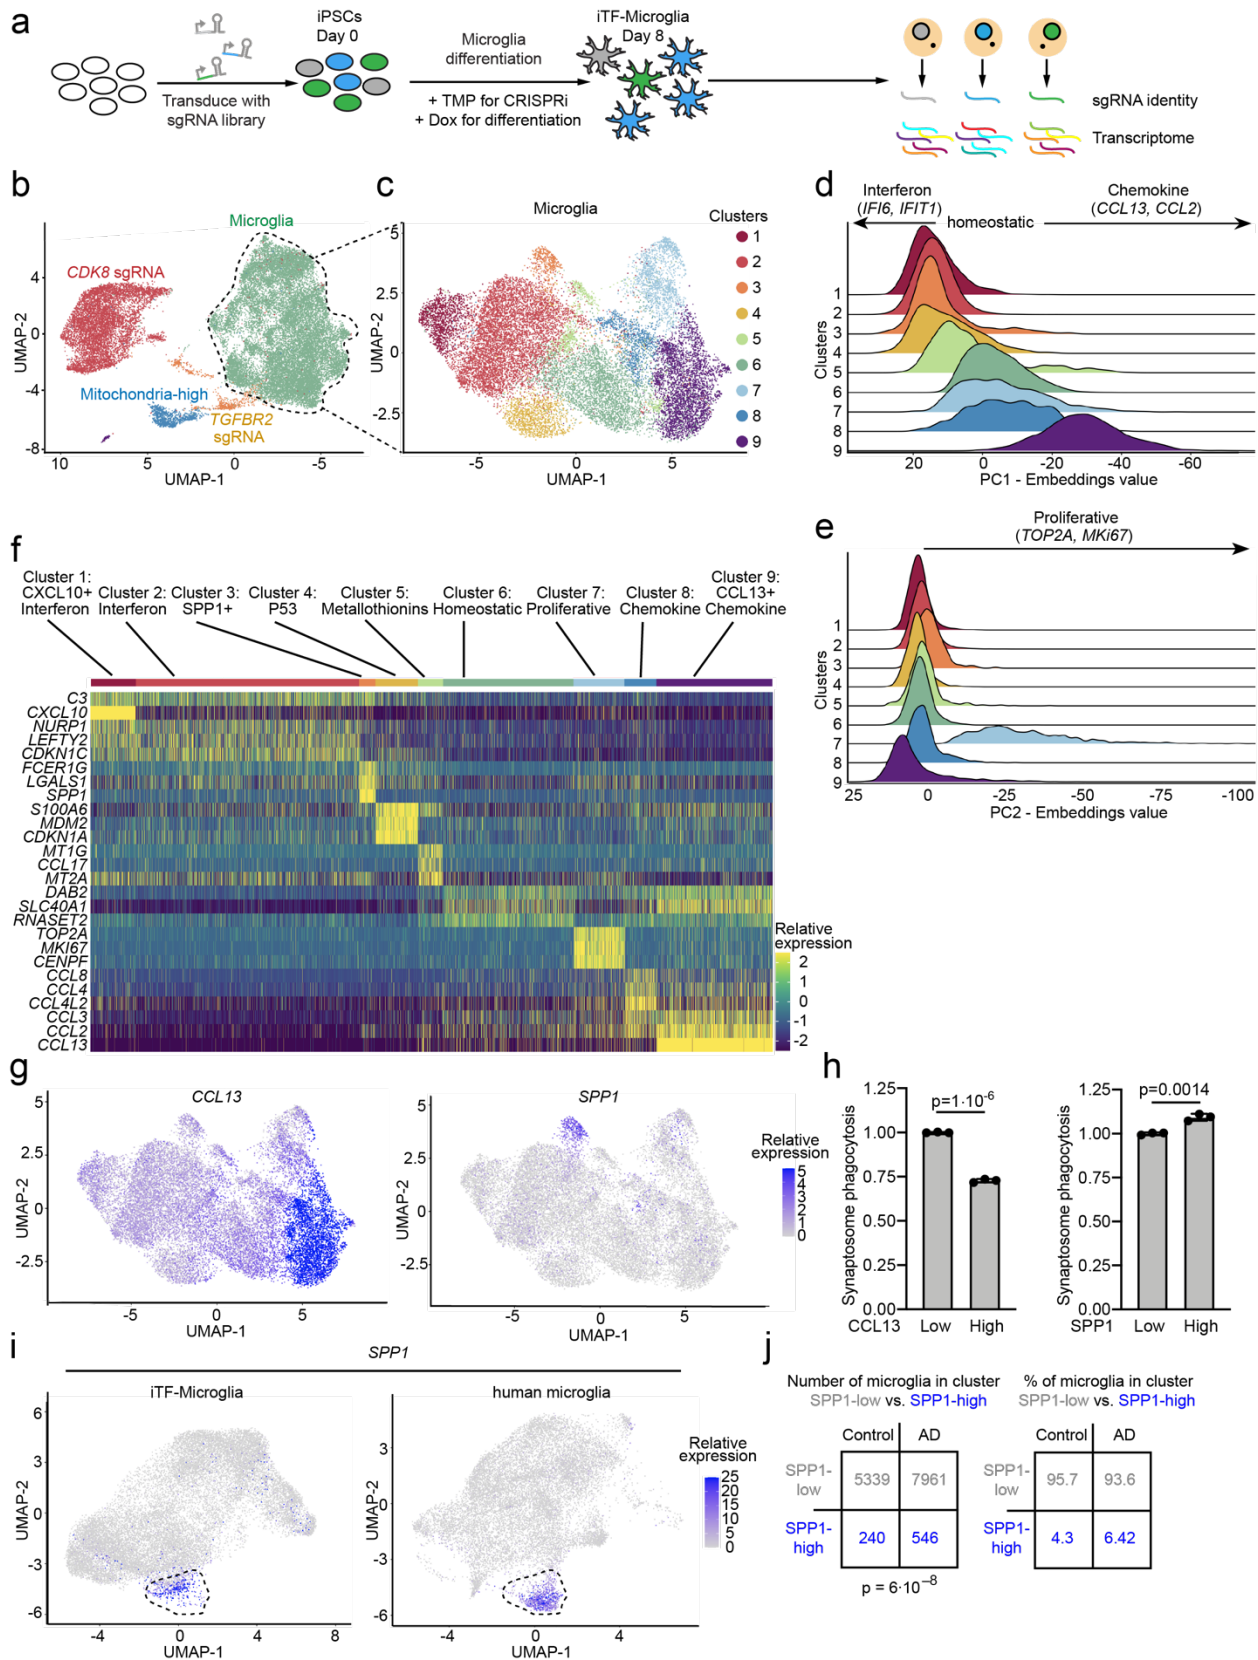

1509  
1510

**Figure 6 (legend overleaf)**

1511 **Figure 6: Single-cell RNA sequencing reveals distinct and disease-related microglia**  
1512 **subclusters. a**, Strategy for the CROP-seq screen. iPSCs expressing inducible CRISPRi  
1513 machinery were transduced with a pooled library of 81 sgRNAs CROP-seq vector pMK1334.  
1514 iPSCs are differentiated to iTF-Microglia and subjected to scRNAseq to obtain single-cell  
1515 transcriptomes and identify expressed sgRNAs. **b**, UMAP projection of the 28,905 cells in the  
1516 post-QC CROP-seq dataset. Cells are colored by sgRNA (*CDK8*-red, *TGFBR2*-orange) and cells  
1517 with a high percentage of mitochondrial transcripts (blue). Microglia are labeled in green. Each  
1518 dot represents a cell. **c**, UMAP projection depicting the 9 different clusters within the 19,834  
1519 microglia. Each dot represents a cell. The cells are color-coded based on their cluster  
1520 membership. **d-e**, Ridge plots depicting iTF-Microglia clusters along PC1 (d) and PC2 (e). PC1  
1521 spans inflammation status (Interferon activated-homeostatic-chemokine activated) while PC2  
1522 spans proliferation status. **f**, Heatmap of iTF-Microglia clusters 1-9 and the relative expression of  
1523 the top three differentially expressed genes of each cluster. **g**, UMAP projection of distinct  
1524 marker expression of *CCL13* (Left) and *SPP1* (Right). *CCL13* is a marker for cluster 9 and *SPP1*  
1525 is a marker for cluster 3. Cells are colored by the expression levels of the indicated gene. **h**,  
1526 Phagocytic activity of iTF-Microglia in different states. Flow cytometry measurement of  
1527 phagocytosis of pHrodo-Red-labelled synaptosomes (Left, Phagocytosis in *CCL13*<sup>high</sup> and  
1528 *CCL13*<sup>low</sup> iTF-Microglia) (Right, Phagocytosis in *SPP1*<sup>high</sup> and *SPP1*<sup>low</sup> iTF-Microglia). Values  
1529 represent mean +/- sd of n=3; p values from two-tailed Student's t-test. **i**, Integration of single-  
1530 cell transcriptomes of iTF-Microglia and microglia from post-mortem human brains<sup>7</sup>. In the  
1531 integrated UMAP, iTF-Microglia (Left) with high *SPP1* expression and human brain-derived  
1532 microglia with high *SPP1* expression (Right) form a cluster (dashed outline). **j**, In brains from  
1533 patients with Alzheimer's disease (AD), a higher fraction of microglia is in the *SPP1*<sup>high</sup> cluster  
1534 compared to control brains (data from Olah *et al.*<sup>7</sup>; P value from two-sided Fisher's exact test).  
1535  
1536

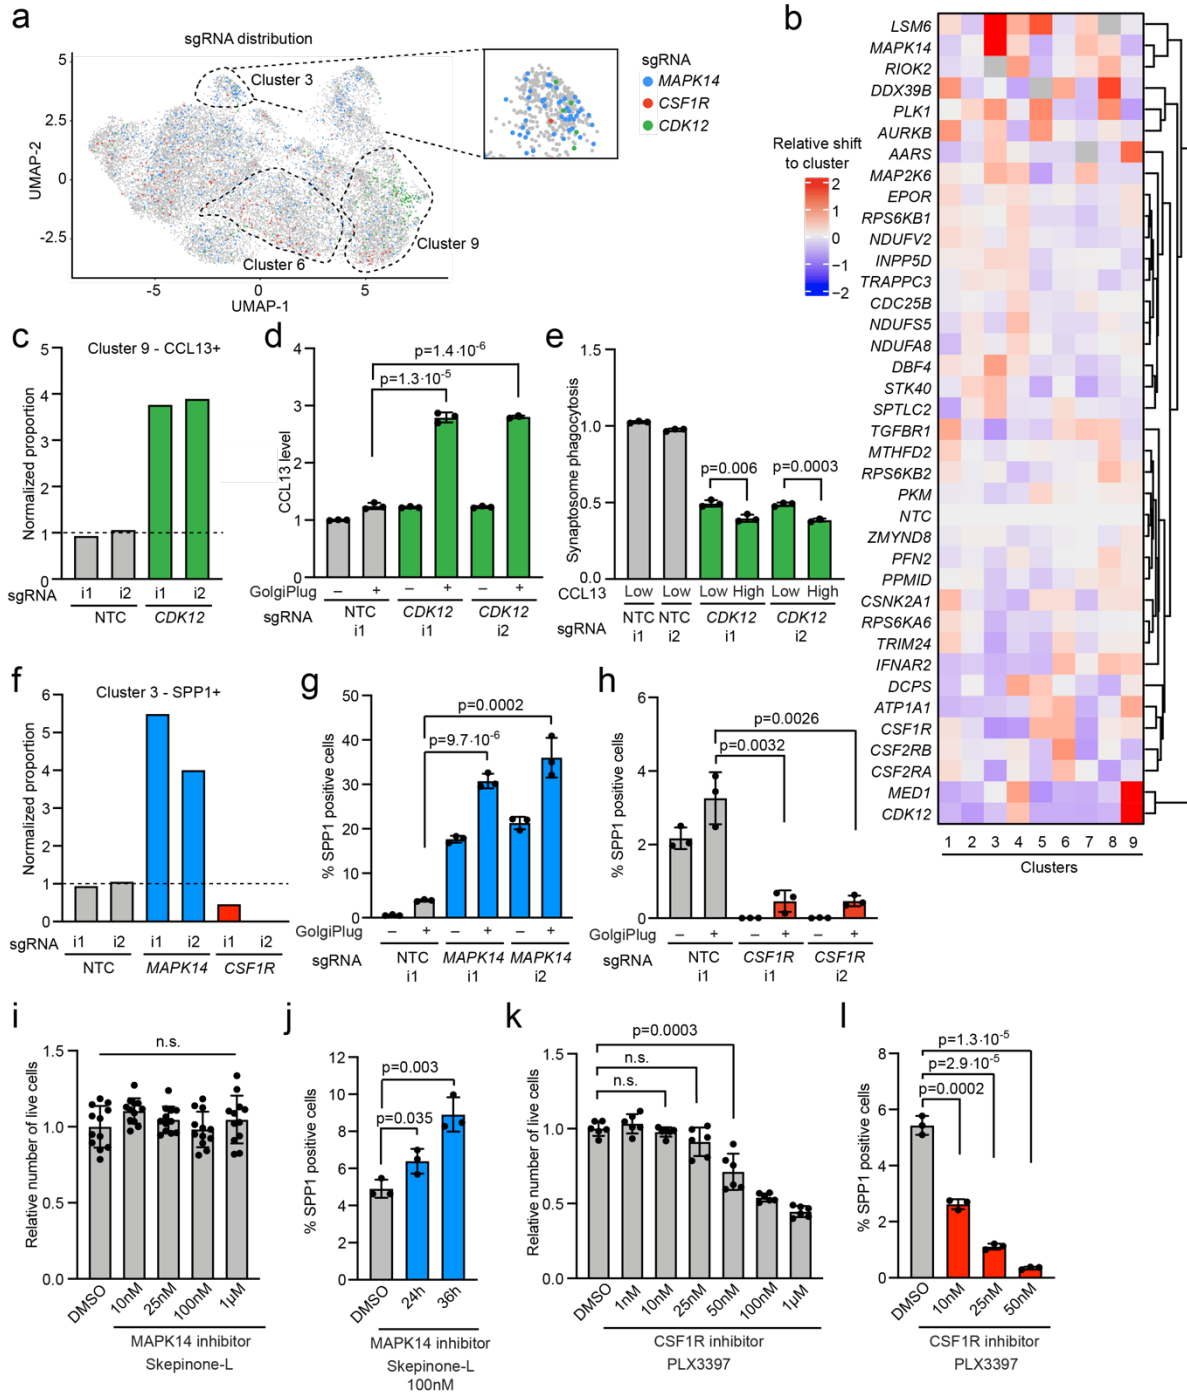

1537  
1538  
1539  
1540  
1541  
1542  
1543  
1544  
1545

**Figure 7: CROP-seq reveals changes in cluster occupancy induced by gene knockdown.**

**a**, sgRNA distribution across the iTF-Microglia clusters. UMAP projection depicts cells colored by sgRNA. Cells with sgRNAs targeting *MAPK14* (blue), *CSF1R* (red), and *CDK12* (green), are enriched in clusters 3, 6, and 9, respectively. Insert shows cluster 3. **b**, Changes in cluster distribution after CRISPRi knockdown of targeted genes in iTF-Microglia. Heatmap with hierarchical clustering of 37 target genes and non-targeting control (NTC) and their distribution in clusters 1-9. **c**, Proportion of cells in cluster 9 (CCL13+) expressing either non-targeting control (NTC) sgRNAs or sgRNAs targeting *CDK12*. **d**, Functional validation of increased



1546 CCL13 level in iTF-Microglia expressing sgRNAs targeting *CDK12* compared to cells  
1547 expressing a non-targeting control (NTC) sgRNA. CCL13 levels were measured via flow  
1548 cytometry +/- 5h of GolgiPlug treatment. Values represent mean +/- sd of n = 3 biological  
1549 replicates; p values from two-tailed Student's t-test. **e**, Decreased synaptosome phagocytosis of  
1550 iTF-Microglia expressing sgRNAs targeting *CDK12* compared to cells expressing non-targeting  
1551 control (NTC) sgRNA. Phagocytosis is further reduced in the CCL13-high population of cells  
1552 expressing sgRNAs targeting *CDK12*. Phagocytosis was measured via flow cytometry with  
1553 additional staining for CCL13. Values represent mean +/- sd of n = 3 biological replicates; p  
1554 values from two-tailed Student's t-test. **f**, Proportion of cells in cluster 3 (SPP1+) expressing  
1555 either non-targeting control (NTC) sgRNAs or sgRNAs targeting *MAPK14* or *CSF1R*. **g-h**,  
1556 Functional validation of altered percentage of SPP1 positive cells in iTF-Microglia expressing  
1557 sgRNAs targeting *MAPK14* (g) or *CSF1R* (h) compared to cells expressing a non-targeting  
1558 control (NTC) sgRNA. SPP1 was measured via flow cytometry after treating cells for 5h with  
1559 GolgiPlug. Values represent mean +/- sd of n = 3 biological replicates; p values from two-tailed  
1560 Student's t-test. **i**, Survival of iTF-Microglia after treatment with various concentrations of  
1561 *MAPK14* inhibitor Skepinone-L. Viable cells were quantified using the CellTiter-Glo assay 24h  
1562 after treatment with Skepinone-L. Values represent mean +/- sd of n = 12 biological replicates.  
1563 Data was analyzed by ANOVA. **j**, Percentage of SPP1-positive cells after 100 nM Skepinone-L  
1564 treatment. SPP1 was measured via flow cytometry after treating cells for 24 h or 36 h with  
1565 Skepinone-L and an additional 5 h with GolgiPlug. Values represent mean +/- sd of n = 3  
1566 biological replicates; p values from two-tailed Student's t-test. **k**, Survival of iTF-Microglia after  
1567 treatment with various concentrations of *CSF1R* inhibitor PLX3397. Viable cells were quantified  
1568 using the CellTiter-Glo assay, 24h after treatment with PLX3397. Values represent mean +/- sd  
1569 of n = 6 biological replicates; p values from two-tailed Student's t-test. **j**, Percentage of SPP1  
1570 positive cells after PLX3397 treatment. SPP1 was measured via flow cytometry after treating  
1571 cells for 24 h with PLX3397 and an additional 5 h with GolgiPlug. Values represent mean +/- sd  
1572 of n = 3 biological replicates; p values from two-tailed Student's t-test.  
1573

**a**

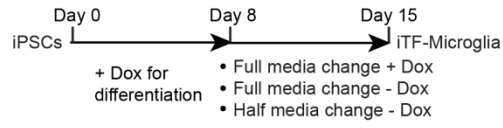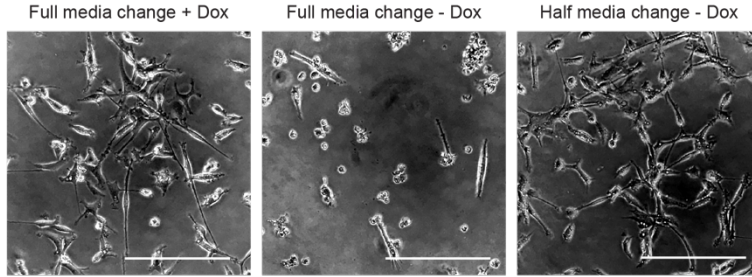

**b**

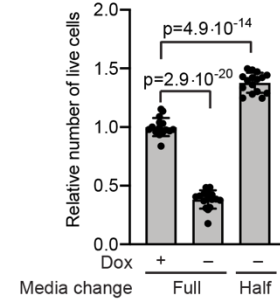

**c**

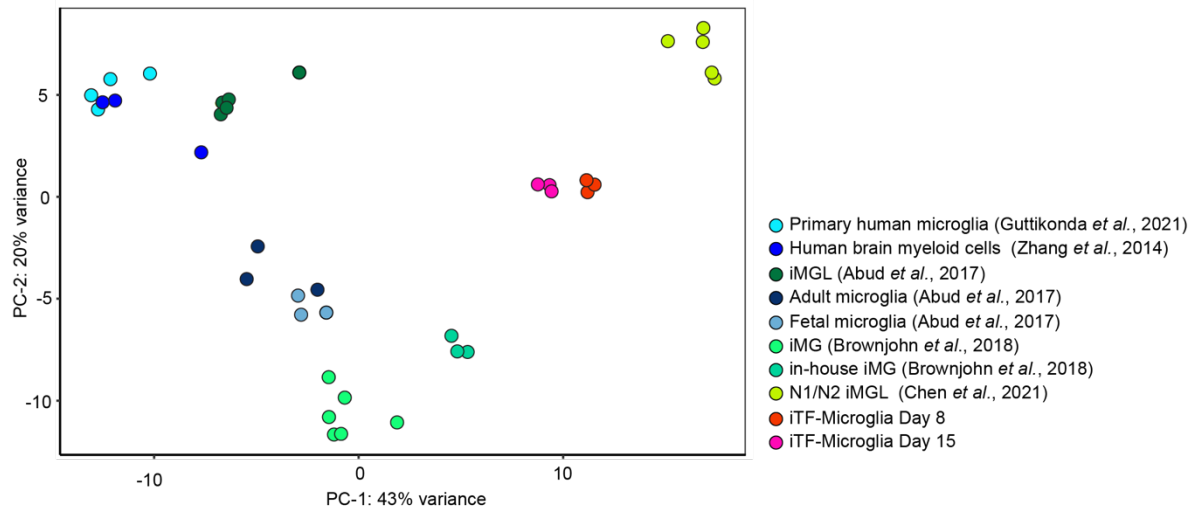

**d**

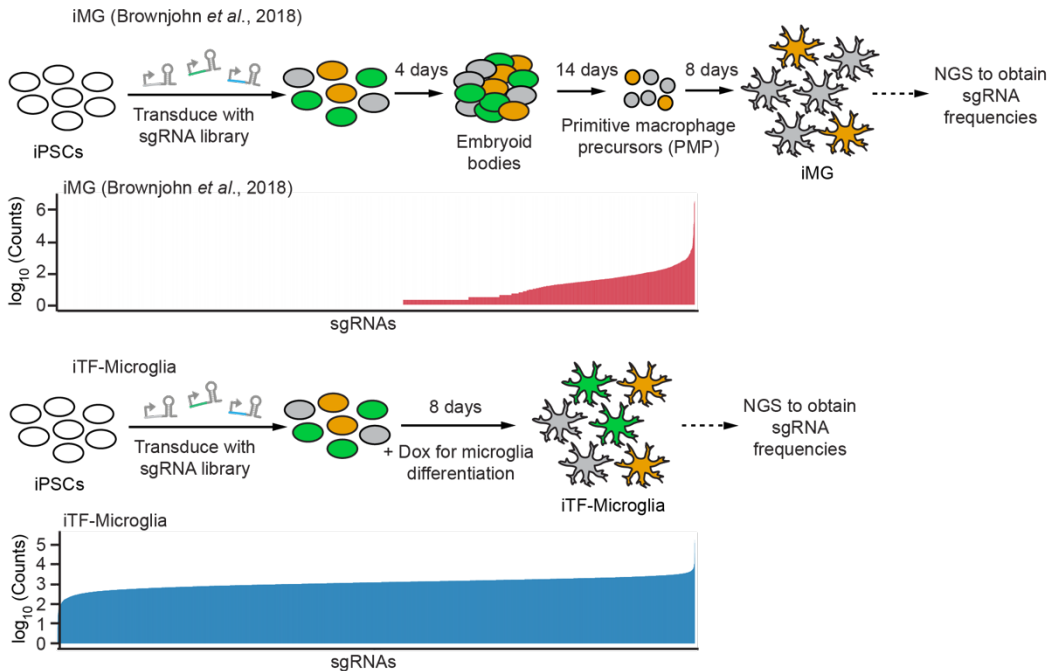

1575

1576 **Extended Data Figure 1: Impact of Doxycycline removal on iTF-Microglia survival and**  
1577 **sgRNA recovery in iPSC-derived microglia generated with different protocols. a**

1578 Comparison of iTF-Microglia viability after Day 8 with different protocols. *Top*: timeline with  
1579 different doxycycline supplementation paradigms, *bottom*: representative phase-contrast images

1580 at Day 15 with the indicated doxycycline supplementation. Scale bar: 50  $\mu\text{m}$ . **b**, Survival of

1581 iTF-Microglia at Day 15 after different doxycycline treatments indicated in a. Viable cells were  
1582 quantified using the CellTiter-Glo assay. Values represent mean  $\pm$  sd of  $n = 12$  biological

1583 replicates; p values from two-tailed Student's t-test. **c**, Principal component analysis (PCA) on

1584 the expression of microglia marker genes of iTF-Microglia, human adult *ex-vivo* microglia<sup>93</sup>,

1585 fetal and adult microglia<sup>17</sup>, human myeloid cells<sup>25</sup>, other iPSC-microglia<sup>17, 22, 24</sup>. No iPSC

1586 samples were included. Each dot reflects an independent biological sample. Colors represent the

1587 different cell types. **d**, sgRNA recovery after transduction with a pooled sgRNA library in iPSCs

1588 and differentiation with two different iPSC-Microglia protocols. Strategy for the infection of

1589 iPSCs with an sgRNA library with 13,025 elements and timepoint of sgRNA recovery in iPSC-

1590 Microglia with the actual recovered counts of sgRNAs after next-generation-sequencing (NGS)

1591 from the protocol from Brownjohn *et al.*<sup>22</sup> (*Top*) and iTF-Microglia (*Bottom*).

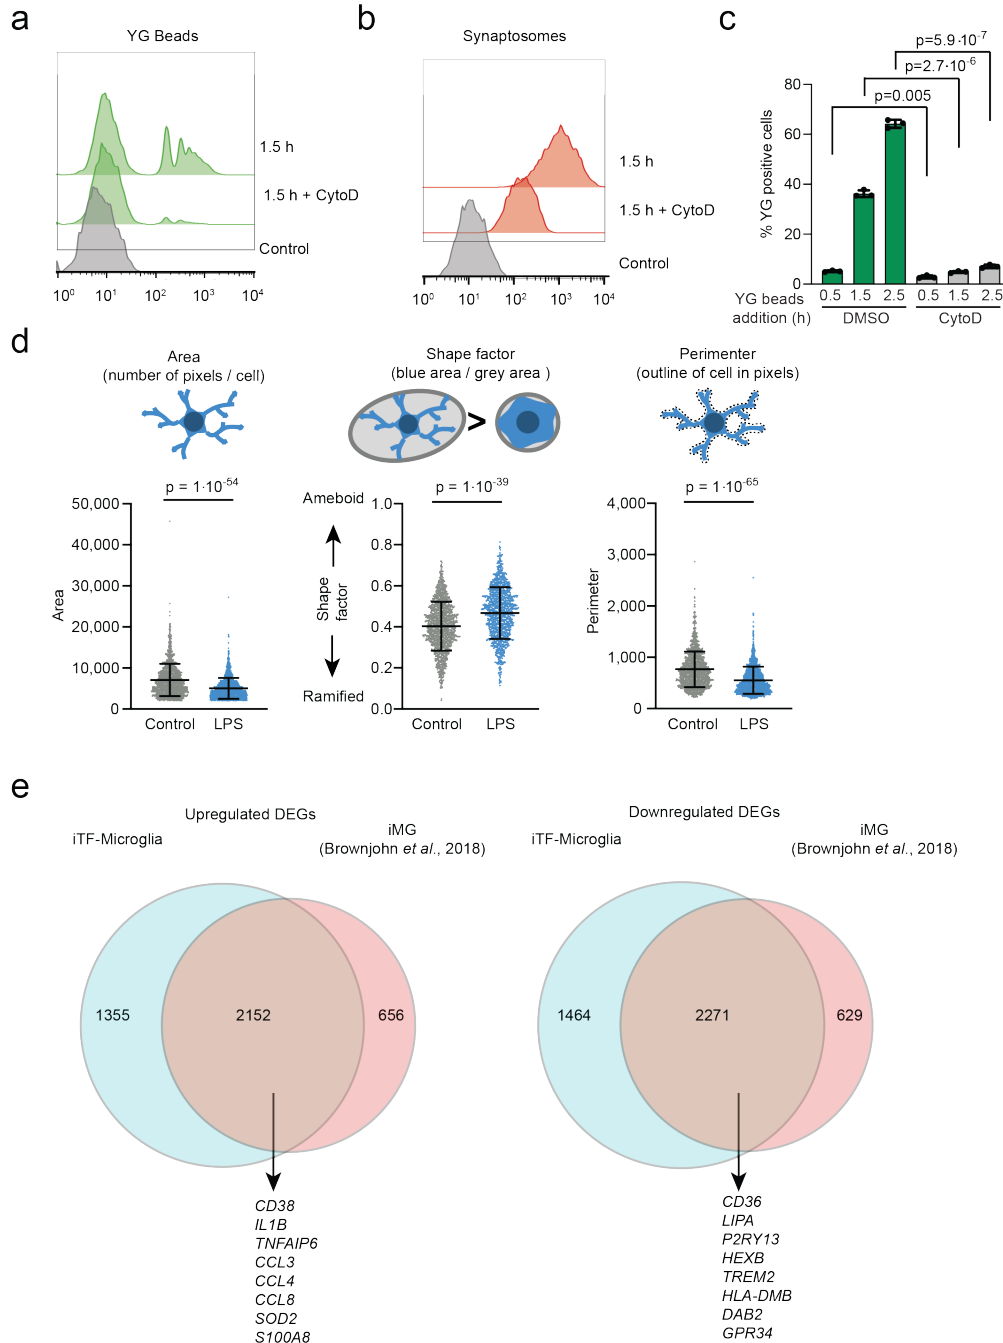

1592  
1593

1594 **Extended Data Figure 2: Phagocytosis capacity of iTF-Microglia and morphological**  
 1595 **changes after LPS treatment. a-b,** Phagocytosis of yellow-green (YG) beads (a) or pHRodo-  
 1596 Red labelled synaptosomes (b) measured by flow cytometry. Histograms of YG-beads-FITC (a)  
 1597 and Synaptosome-PE (b) after 1.5h of substrate exposure +/- 5 $\mu$ M Cytochalasin D (CytoD)  
 1598 treatment. Controls are iTF-Microglia without substrate exposure. **c,** Phagocytosis of yellow-  
 1599 green (YG) beads at different timepoints. Flow cytometric quantification of the percentage of  
 1600 YG bead-positive cells at after 0.5 h, 1.5 h and 2.5 h of incubation with beads. Addition of 5  $\mu$ M  
 1601 CytoD decreases the percentage of YG bead-positive cells. N = three individual biological  
 1602 replicates; p values from two-tailed Student's t-test. **d,** Morphological changes of iTF-Microglia

1603 after LPS treatment. Swarm plots showing the automated quantification of microglia F-actin  
1604 staining in area, shape factor and perimeter with explanation of the three parameters. N = 16  
1605 wells from 3 individual differentiations; p values from two-tailed Mann-Whitney test. **e**,  
1606 Comparison of differentially expressed genes in response to LPS treatment in iTF-Microglia  
1607 versus iPSC-derived microglia (iMG) differentiated following a previously published protocol by  
1608 Brownjohn *et al.*<sup>22</sup>.  
1609

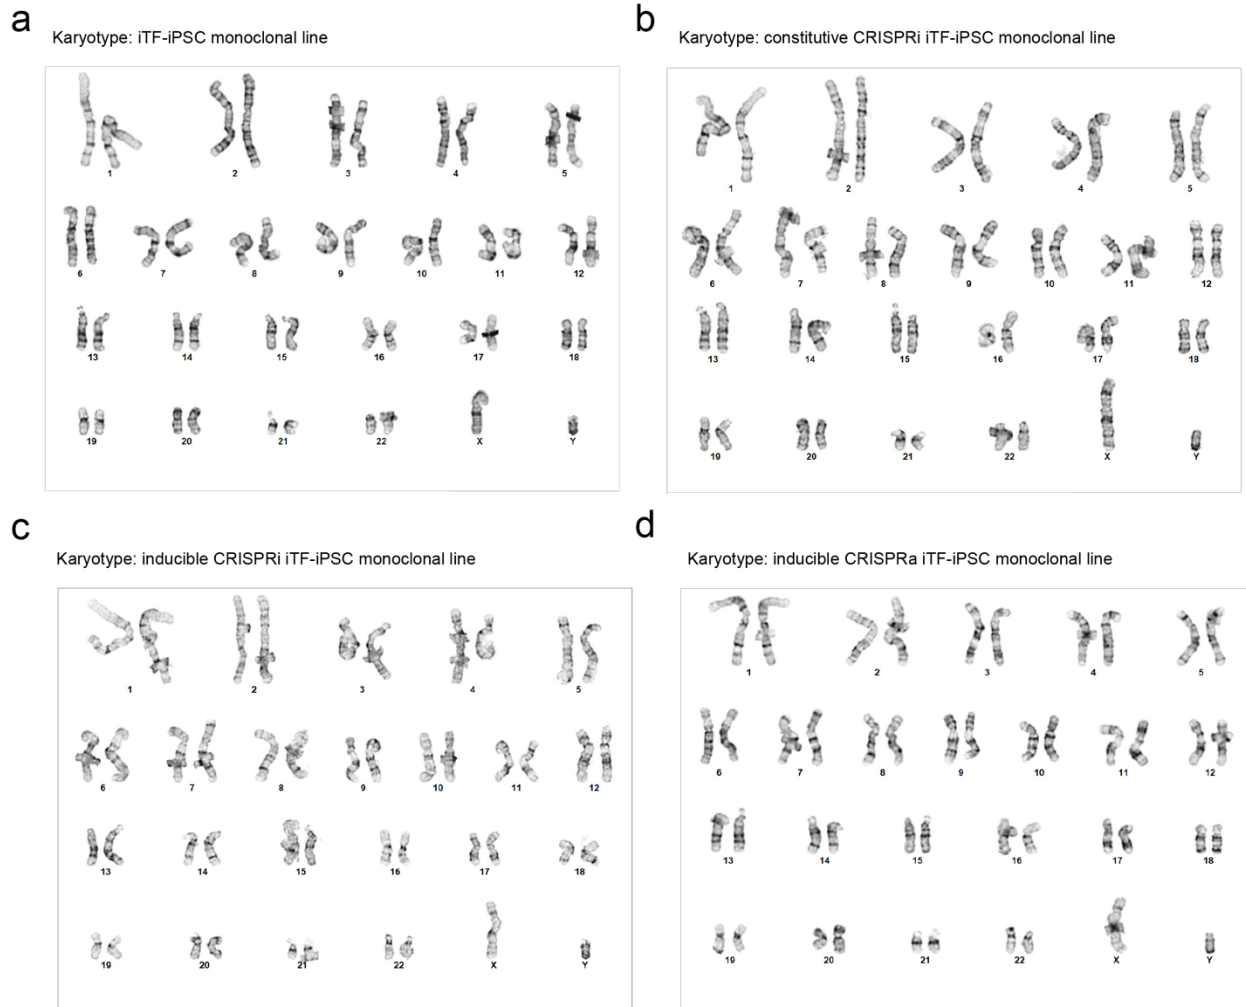

1610  
1611  
1612  
1613  
1614

**Extended Data Figure 3: Karyotyping of the monoclonal iTF-iPSC lines.** A normal karyotype was confirmed for monoclonal **a**, iTF-iPSCs, **b**, constitutive CRISPRi iTF-iPSC, **c**, inducible CRISPRi iTF-iPSC, **d**, inducible CRISPRa iTF-iPSC lines.



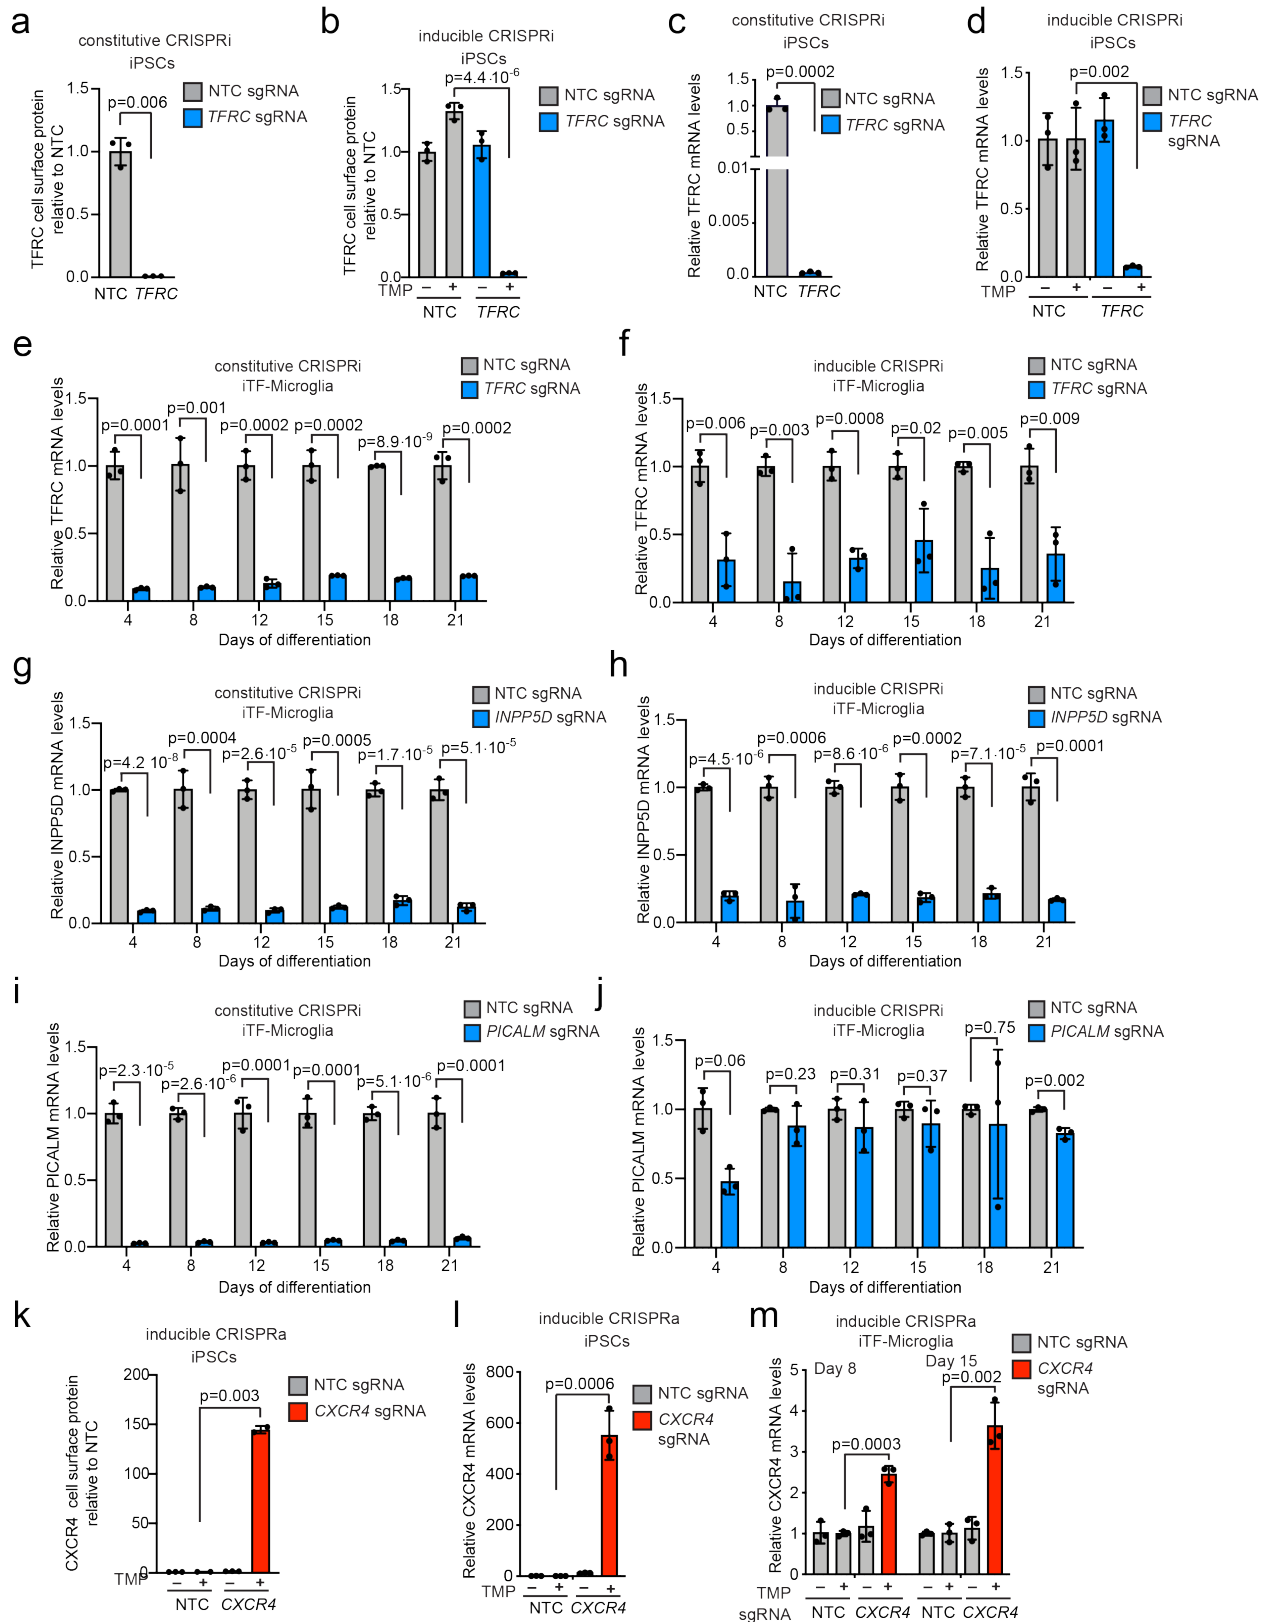

1615  
1616

Extended Data Figure 4 (legend overleaf)

1617 **Extended Data Figure 4: Functional validation of CRISPRi/a activity in iPSCs and iTF-**  
1618 **Microglia. a-b,** Functional validation of constitutive (a) or inducible (b) CRISPRi activity via  
1619 flow cytometry of TFRC surface protein level stained iPSCs expressing a TFRC-targeting  
1620 sgRNA or a non-targeting control (NTC) sgRNA (mean +/- sd, n = 3 biological replicates; p  
1621 values from two-tailed Student's t-test). TMP was added to induce CRISPRi activity where  
1622 indicated. **c-d, Knockdown of TFRC in iPSCs with (a) the constitutive and (b) the inducible**  
1623 **CRISPRi system.** qPCR quantification of the relative fold change of TFRC mRNA levels in  
1624 CRISPRi-iPSCs expressing a TFRC sgRNA as compared to a non-targeting control sgRNA in  
1625 the presence or absence of trimethoprim (TMP). (mean +/- sd, n = 3 biological replicates; p  
1626 values from two-tailed Student's t-test). TFRC levels were normalized to the housekeeping gene  
1627 GAPDH. **e-j Knockdown of three different genes in iTF-Microglia with (e,g,i) constitutive**  
1628 **CRISPRi and (f,h,j) inducible CRISPRi.** qPCR quantification of the relative fold change of  
1629 *TFRC* mRNA levels (e,f), *INPP5D* mRNA levels (g,h) or *PICALM* mRNA levels (I,j) in  
1630 CRISPRi-iTF-Microglia expressing a *TFRC* sgRNA (e,f), *INPP5D* sgRNA (g,h) or *PICALM*  
1631 sgRNA (I,j) compared to a non-targeting control sgRNA at different days of differentiation in  
1632 the presence of TMP (mean +/- sd, n = 3 biological replicates). **k,** Functional validation of  
1633 inducible CRISPRa activity via flow cytometry of CXCR4 surface protein level stained iPSCs  
1634 expressing a CXCR4-targeting sgRNA or a non-targeting control (NTC) sgRNA (mean +/- sd, n  
1635 = 3 biological replicates; p values from two-tailed Student's t-test). TMP was added to induce  
1636 CRISPRi activity where indicated. **l-m,** qPCR quantification of the relative fold change of  
1637 CXCR4 mRNA levels in inducible CRISPRa-iPSCs expressing a CXCR4 sgRNA as compared  
1638 to a non-targeting control sgRNA in the presence or absence of trimethoprim (TMP), which  
1639 stabilizes the DHFR degron. (mean +/- sd, n = 3 biological replicates; p values from two-tailed  
1640 Student's t-test). CXCR4 levels were normalized to the housekeeping gene GAPDH.  
1641  
1642

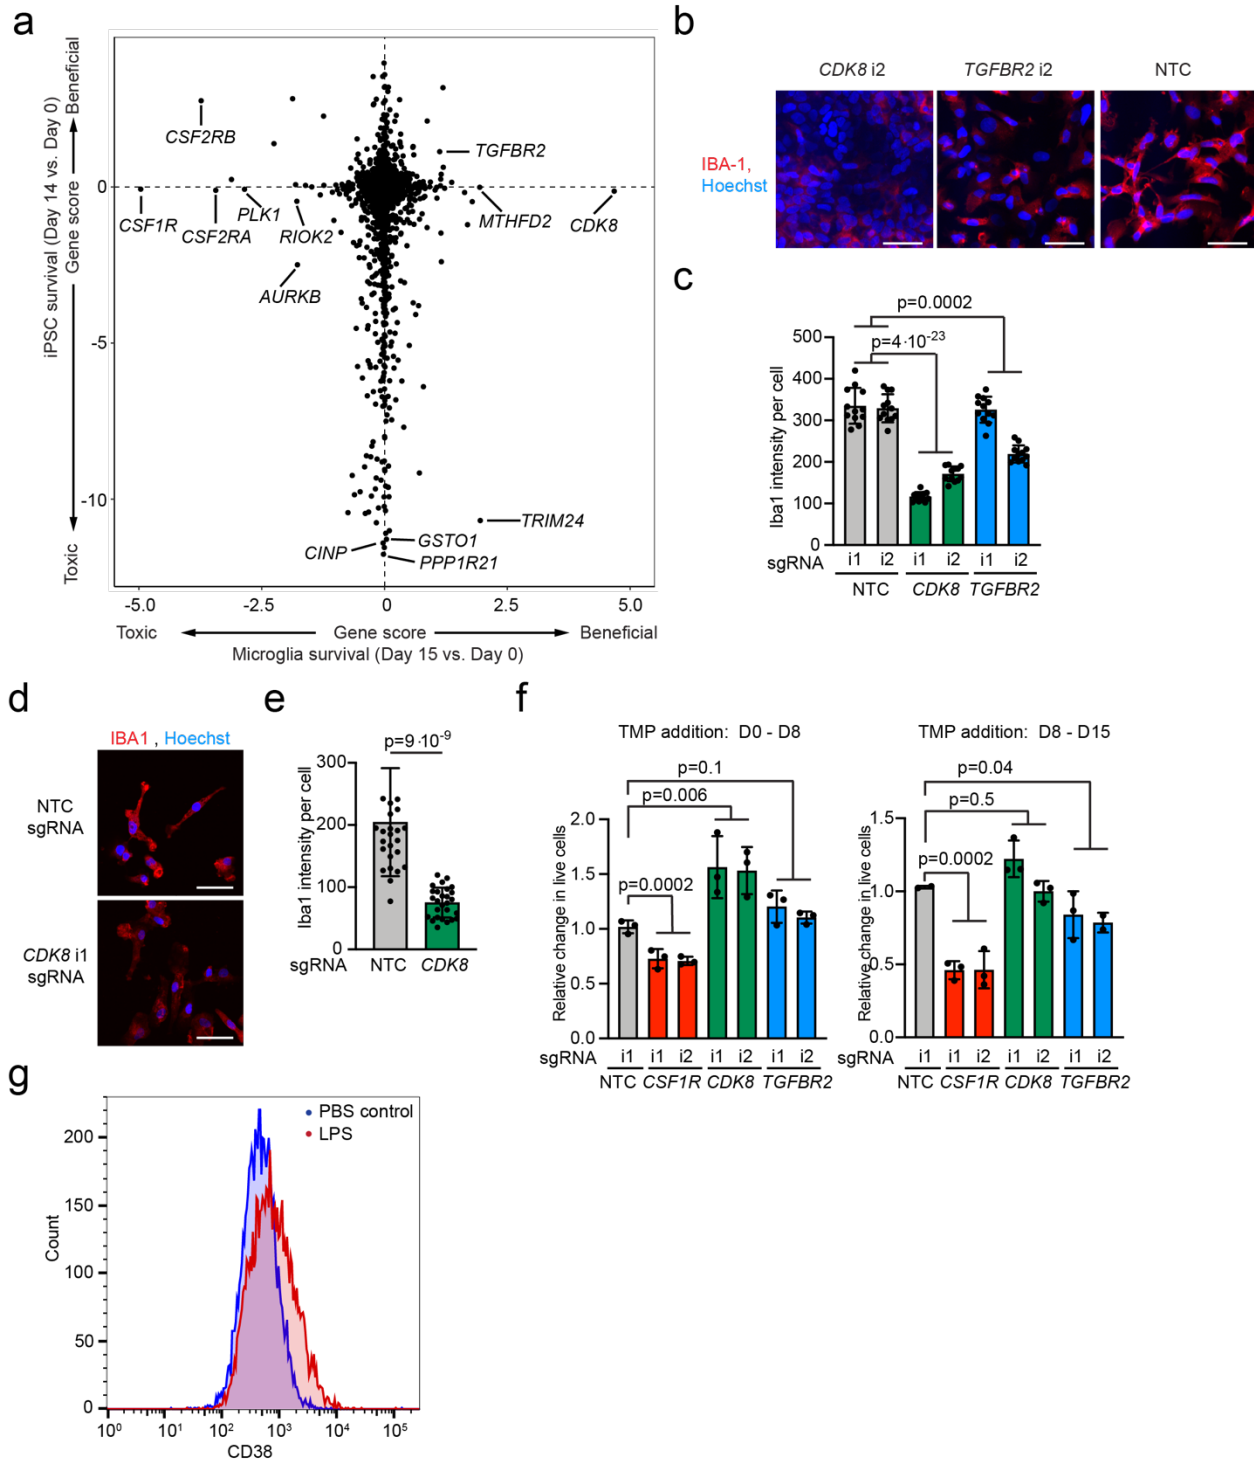

1643  
1644  
1645  
1646  
1647  
1648  
1649  
1650

**Extended Data Figure 5: Knockdown of *CDK8* and *TGFBR2* induces proliferation and decreases microglia markers in iPSC-derived microglia generated with different protocols**

**a**, Comparison of Gene Scores from CRISPRi survival/proliferation screens in iTF-Microglia (this study) vs. iPSCs<sup>15</sup>. Each dot represents a gene. **b-c**, IBA1 staining in Day 8 CRISPRi iTF-Microglia containing sgRNAs targeting *CDK8* or *TGFBR2* compared to non-targeting control (NTC) sgRNAs. **b**, Representative images. Scale bar = 50  $\mu$ m. **c**, Quantification. Mean  $\pm$ sd, n = 6 fields of view from 2 different wells per sgRNA; p values from two-tailed Student's t-test. **d-e**,

1651 IBA1 staining in Day 8 iMGs generated by the protocol from Brownjohn *et al.*, 2018 expressing  
1652 sgRNAs targeting *CDK8* compared to non-targeting control (NTC) sgRNAs. **d**, Representative  
1653 images. Scale bar = 50  $\mu$ m. **e**, Quantification. Mean +/-sd, n =9 fields of view from 3 different  
1654 wells per sgRNA; p values from two-tailed Student's t-test. **f**, Relative change in live cells of  
1655 iTF-Microglia at Day 8 (*left*) and Day 15 (*right*) containing sgRNAs targeting *CDK8*, *CSF1R* or  
1656 *TGFBR2* compared to non-targeting control sgRNAs. The inducible CRISPRi system was  
1657 stabilized with TMP from Day 0 – Day 8 (*left*) or Day 8 – Day 15 (*right*). (mean +/-sd, n = 3  
1658 biological replicates; p values from two-tailed Student's t-test. **g**, CD38 cell surface levels  
1659 measured by flow cytometry in iTF-Microglia 24 h treatment with 100 ng/mL LPS or PBS  
1660 control.  
1661  
1662

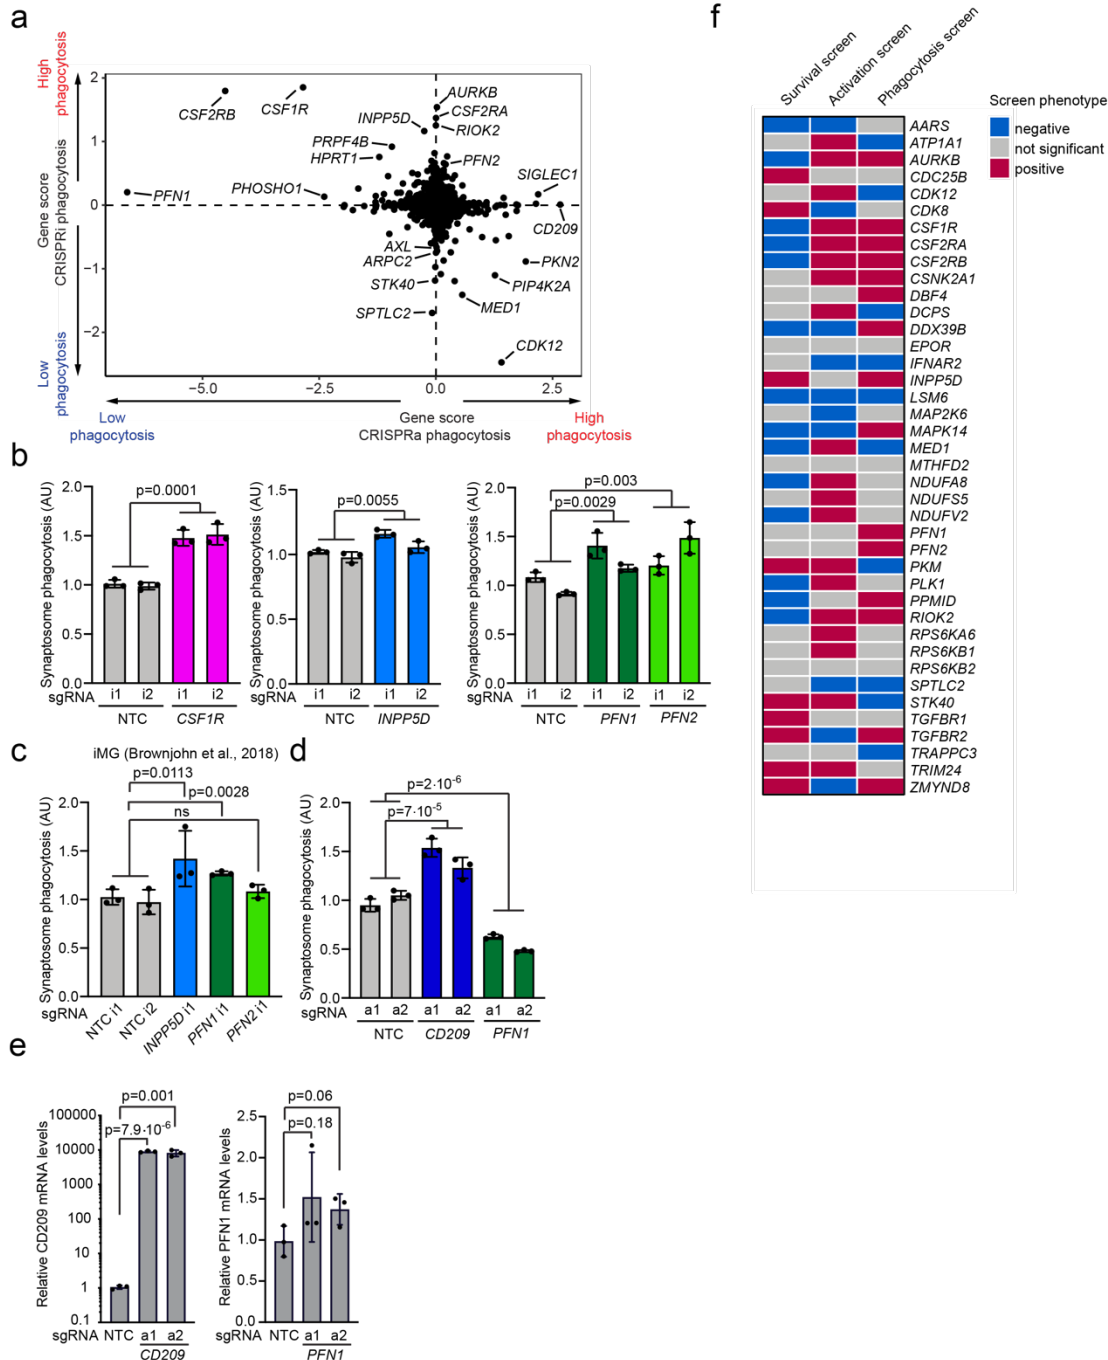

1663  
1664

1665 **Extended Data Figure 6: Validation of phagocytosis hits and overview of genes selected for**  
 1666 **the CROP-seq screen based on primary screens. a**, Comparing Gene Scores for hits from  
 1667 phagocytosis CRISPRi and CRISPRa screens. Each dot represents a gene. **b-d**, Validation of  
 1668 (b,c) CRISPRi hits and (d) CRISPRa hits in (b,d) iTF-Microglia or (c) iPSC-derived microglia  
 1669 differentiated using an alternative protocol by Brownjohn *et al.*<sup>22</sup> Phagocytosis of pHrodo-  
 1670 labelled synaptosomes by cells expressing either non-targeting control (NTC) sgRNAs or  
 1671 sgRNAs targeting *CSF1R*, *INPP5D*, *PFN1* and *PFN2* was quantified by flow cytometry. Values  
 1672 represent mean +/- sd of n = 3 biological replicates; p values from two-tailed Student's t-test. **e**,



1673 Overexpression of CD209 (*left*) and PFN1 (*right*) with the inducible CRISPRa system in iTF-  
1674 Microglia. QPCR quantification of the relative fold change of CD209 and PFN1 mRNA levels in  
1675 iTF-Microglia expressing CD209 and PFN1 sgRNA as compared to a non-targeting control  
1676 sgRNA in the presence of TMP (mean +/- sd, n = 3 biological replicates; p values from two-  
1677 tailed Student's t-test). CD209 and PFN1 levels were normalized to the housekeeping gene  
1678 GAPDH. **f**, Binary heatmap of genes selected for the CROP-seq screen and their knockdown  
1679 phenotype in the CRISPRi survival, phagocytosis and inflammation screens. Red: KD increases  
1680 phenotype (positive hit). Blue: KD decreases phenotype (negative hit). Grey: not a significant  
1681 hit,  $p > 0.1$ .  
1682

1683

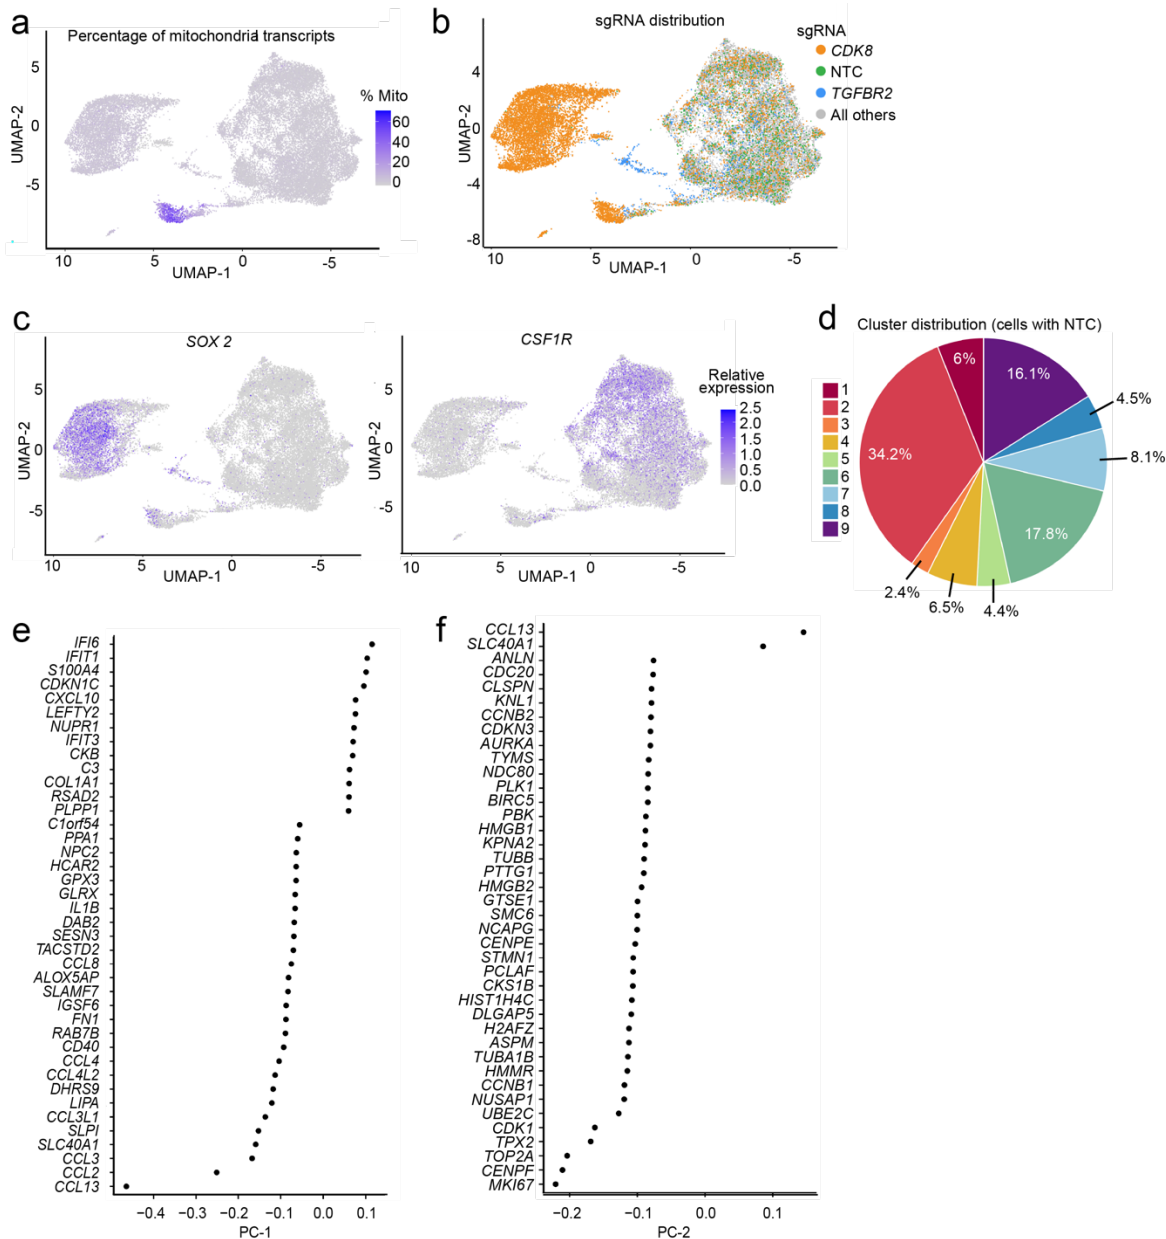

1684

1685

1686

1687

1688

1689

1690

1691

1692

1693

**Extended Data Figure 7: Characterization of microglia cluster signatures.** a-c, UMAP projection representing single-cell transcriptomes, with cells colored based on (a) the percentage of mitochondrial transcripts, (b) the expressed sgRNAs, with sgRNAs targeting *CDK8* in orange, sgRNAs targeting *TGFB2* in blue, non-targeting control sgRNAs (NTC) in green, and all other sgRNAs in grey, or (c) expression levels of *SOX2* (Left) or *CSF1R* (Right). d, Distribution of iTF-Microglia expressing non-targeting (NTC) sgRNAs across the 9 clusters described in Figure 6. e-f, the top 40 genes with the highest embedding values for (e) the first principal component (PC-1) and (f) the second principal component (PC-2), displayed in ranking order.

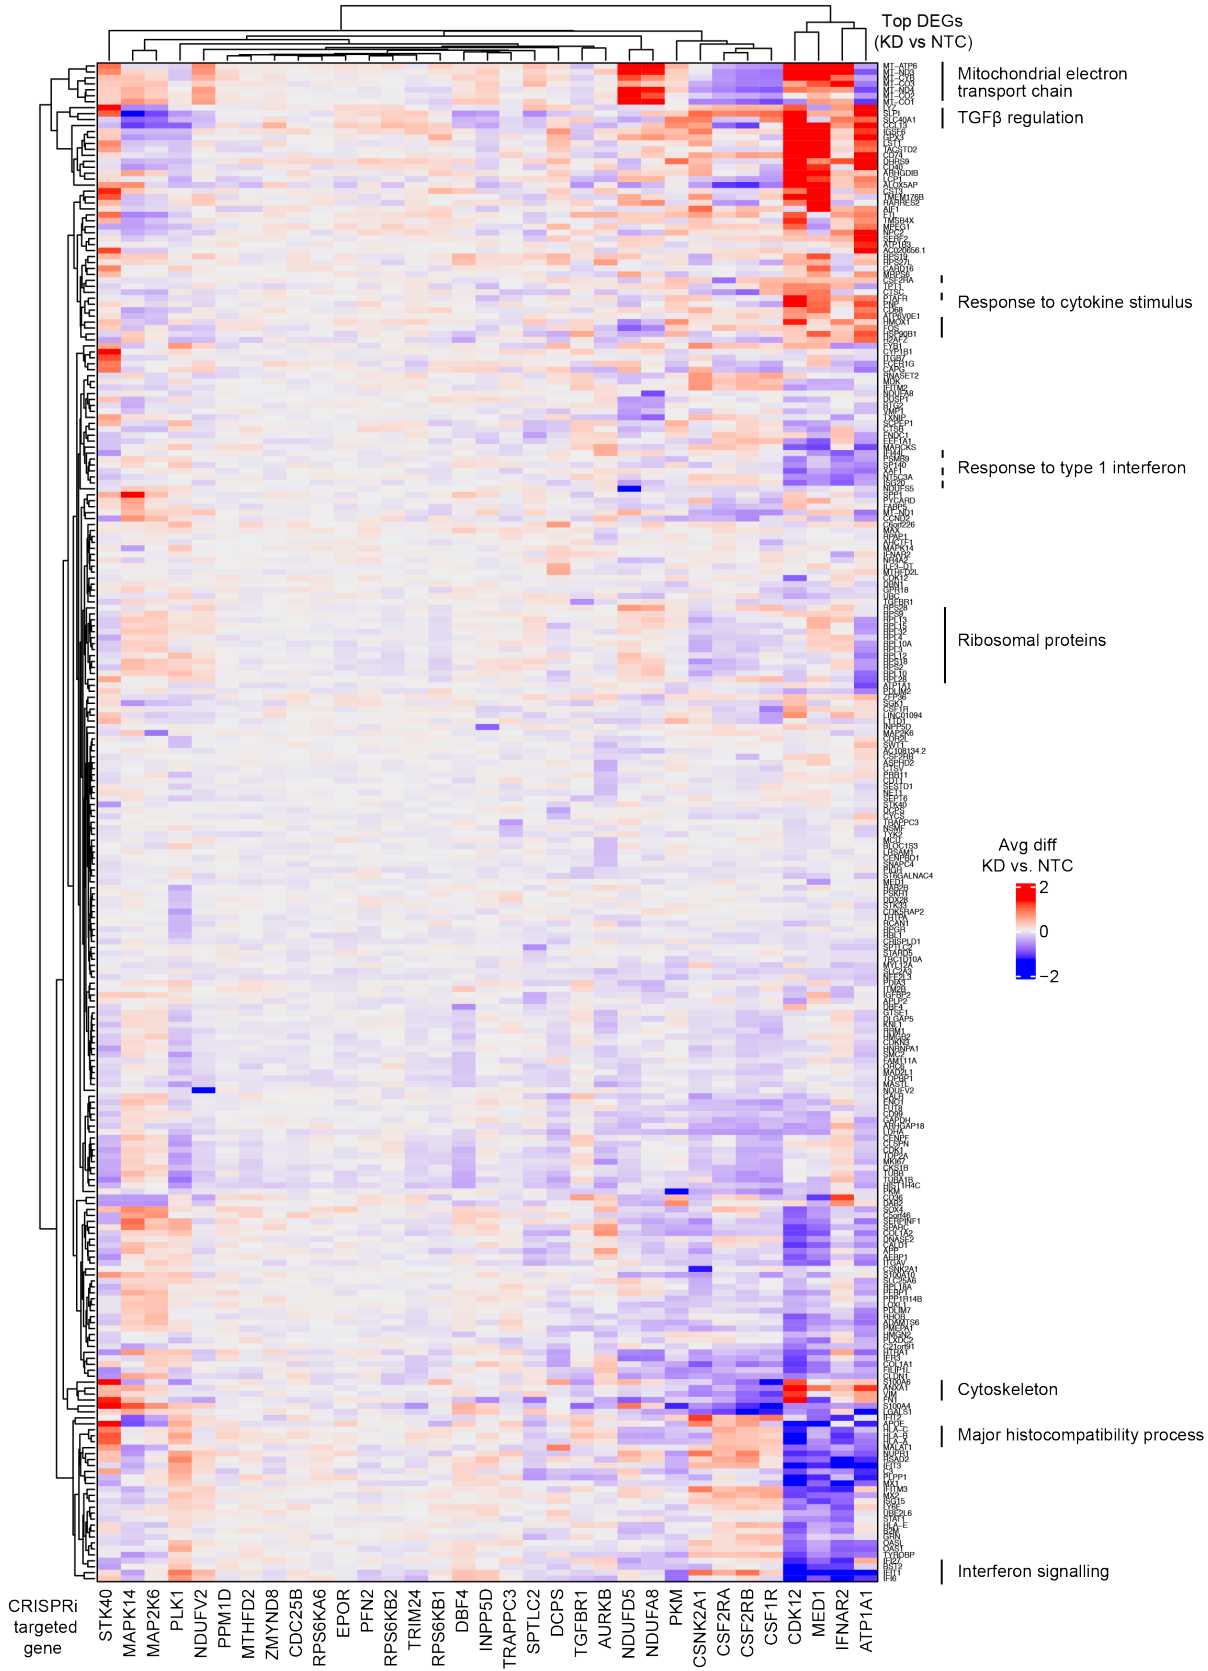

1694

1695

**Extended Data Figure 8 (legend overleaf).**

1696 **Extended Data Figure 8: CROP-seq reveals transcriptomic changes in iTF-Microglia**  
1697 **induced by gene knockdown.** Changes in gene expression in response to CRISPRi knockdown  
1698 of genes of interest in iTF-Microglia. Each column represents one CRISPRi-targeted gene. For  
1699 each CRISPRi-targeted gene, cells with the strongest knockdown were selected and the top 20  
1700 differentially expressed genes in comparison to non-targeting control (NTC) sgRNA containing  
1701 cells were selected. The merged set of these genes is represented by the rows. Rows and columns  
1702 were clustered hierarchically based on Pearson correlation. Functionally related clusters of  
1703 differentially expressed genes are labeled.  
1704  
1705  
1706

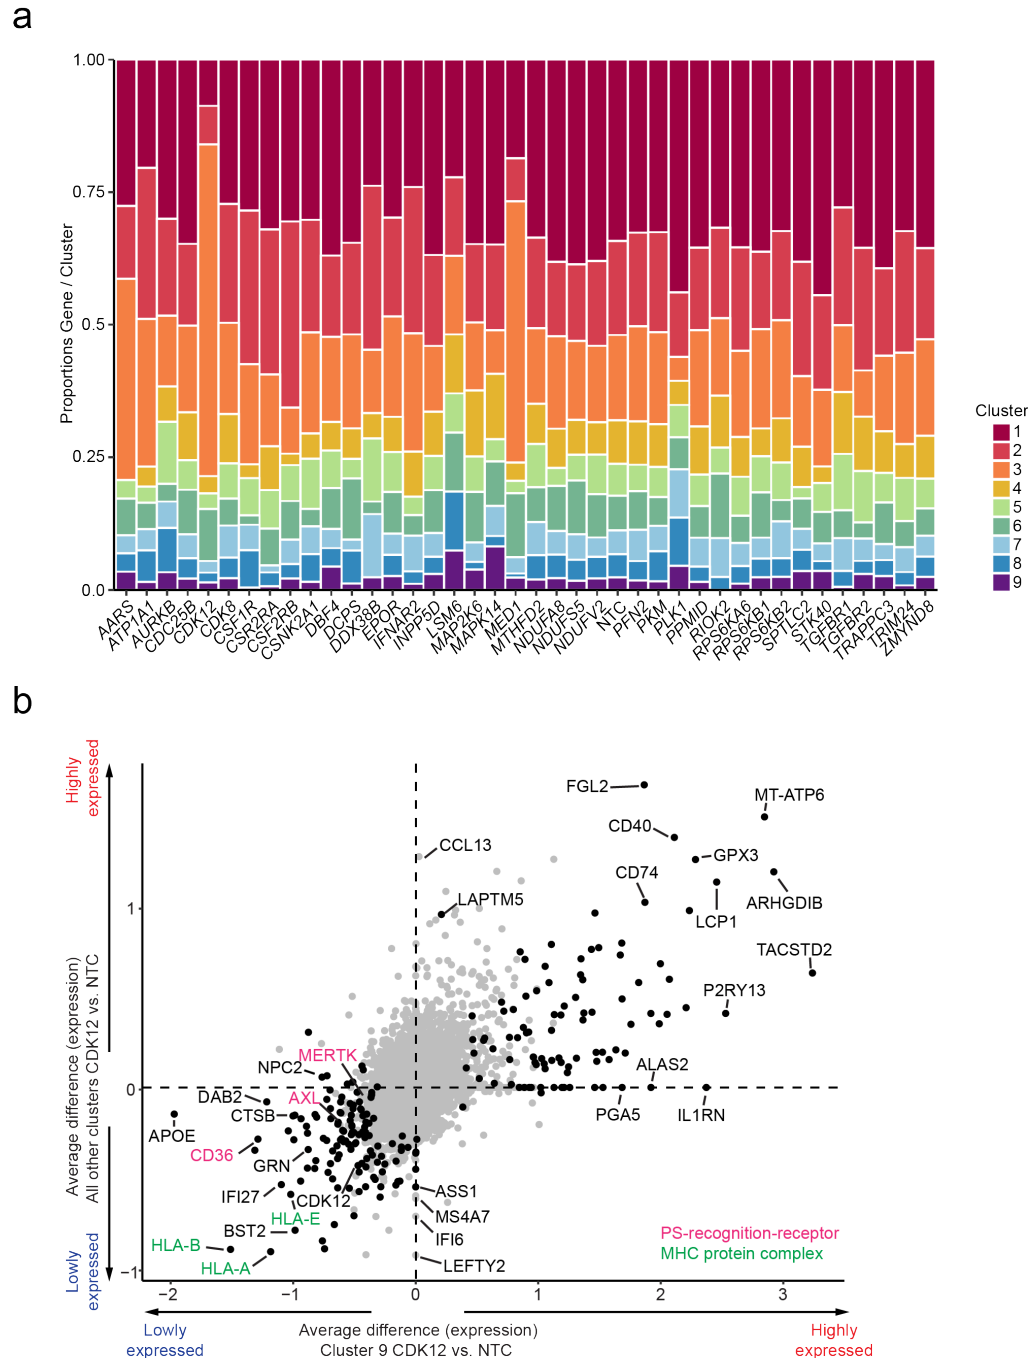

1707  
 1708 **Extended Data Figure 9: Transcriptomic changes in iTF-Microglia induced by *CDK12***  
 1709 **knockdown in cluster 9 and in all other clusters. a,** Changes in cluster distribution after  
 1710 CRISPRi knockdown of targeted genes in iTF-Microglia. Distribution of cells according to the  
 1711 37 targeted genes and non-targeting control (NTC) in clusters 1-9. **b,** Average differences of  
 1712 gene expression induced by *CDK12* knockdown in cluster 9 compared to those in all other  
 1713 clusters. Genes encoding phosphatidylserine (PS) recognition receptors are labeled in magenta  
 1714 and Genes encoding MHC complex components are labeled in green.  
 1715



1716 **SUPPLEMENTARY TABLE LEGENDS**

1717

1718 **Supplementary Table 1. RNA-Seq Normalized Counts, Related to Figure 1.** Gene-level  
1719 counts per sample normalized to library size (transcript per million). Samples, in triplicate,  
1720 include Day 0 iTF-iPSCs, Day 9 iTF-Microglia (PBS-treated and LPS-treated), Day 15 iTF-  
1721 Microglia, and Day 9 Brownjohn-iMG (PBS-treated and LPS-treated). Columns are: Ensembl  
1722 gene ID (ensembl\_id), gene, all samples.

1723

1724 **Supplementary Table 2. RNA-Seq LPS Differentially Expressed Genes, Related to Figure**  
1725 **2.** Differentially expressed genes from comparing expression levels of LPS-treated cells to PBS-  
1726 treated cells in Day 15 iTF-Microglia (first tab) and Brownjohn-iMG (second tab). Columns are:  
1727 Ensembl gene ID (ensembl id), differentially expressed gene (gene), average expression over all  
1728 samples (base mean), effect size estimate PBS vs. LPS ( $\log_2$  fold change),  $\log_2$  fold change  
1729 standard error, p value, and adjusted p value. Tab 1 is iTF-Microglia, tab 2 is Brownjohn-iMG.

1730

1731 **Supplementary Table 3. Primary Screen Phenotypes, Related to Figures 4, 5, and Extended**  
1732 **Data Figure 6.** Phenotypes from survival and FACS-based screens (survival, activation, and  
1733 phagocytosis) are listed for all genes targeted in the H1 library. Columns are: targeted  
1734 transcription start site (index), targeted gene (gene), knockdown phenotype, p value, and the  
1735 gene score (product of phenotype  $-\log_{10}$ (p value)).

1736 **Supplementary Table 4. RNA-Seq, Differentially Expressed Genes as a result of *PFNI***  
1737 **overexpression in iTF-Microglia, Related to Figure 5.** Differentially expressed genes of Day 8  
1738 iTF-Microglia overexpressing two different *PFNI* sgRNAs compared to non-targeting control  
1739 sgRNA (NTC).

1740

1741 **Supplementary Table 5. CROP-seq Pooled sgRNA Library, Related to Figures 6 and 7.**  
1742 Sequences for sgRNAs in CROP-seq pooled sgRNA library. Columns are: gene targeted for  
1743 CRISPRi knockdown (target.gene), sgRNA short name as used in the paper (sgRNA.name), and  
1744 sgRNA protospacer sequence (sgRNA.sequence).

1745

1746 **Supplementary Table 6. Overview of CROP-seq results, Related to Figures 6 and 7.**

1747

1748 **Supplementary Table 7. CROP-seq Cluster Differentially Expressed Genes, Related to**  
1749 **Figure 6.** Differentially expressed genes (DEGs) for each UMAP cluster (1-9) compared to all  
1750 other cluster, only positive values included. Columns are: gene, cluster, average  $\log_2$  fold  
1751 change, p value, adjusted p value

1752

1753 **Supplementary Table 8. CROP-seq Target Gene Cluster Proportions, Related to Figure 7.**  
1754 Relative proportions of cells in clusters (rows) with a sgRNA targeting a given gene (columns)  
1755 normalized to non-targeting control proportions (NTC).

1756

1757 **Supplementary Table 9. CROP-seq Knockdown versus Control Differentially Expressed**  
1758 **Genes, Related to Extended Data Figure 9.** Differentially expressed genes, calculated using  
1759 Student's T-test between cell with CRISPRi knockdown and non-targeting control (NTC)  
1760 sgRNAs. Columns are: gene targeted for CRISPRi knockdown (TargetGene), differentially

1761 expressed gene (Gene), log<sub>2</sub> counts per million, log<sub>2</sub>-fold change, p value, false discovery rate  
1762 (FDR).

1763

1764 **Supplementary Table 10. Individual sgRNA sequences and primers.** qPCR and CROP-seq  
1765 sgRNA enrichment primers, as well as individually cloned sgRNAs are listed. Columns are:  
1766 name of sgRNA or primer (Name), section of sequence (sequence), sequence 5' to 3', use in this  
1767 study (use).

1768

1769
